# Supplementary material for: The mechanism of [3+2] annulations between indole-2-formaldehydes and isatins mediated by N-hetrocyclic carbenes: a DFT study
Source: Royal Society of Chemistry journal article supplement (doi:10.1039/d2nj04442k), 2022-01-01
Supplement: d2nj04442k1.pdf [file d2nj04442k1.pdf]

Electronic Supplementary Material (ESI) for New Journal of Chemistry.

*Supporting Information*

**Mechanism of [3+2] Annulations between Indole-2-formaldehydes and Isatins  
Mediated by N-Heterocyclic Carbene: A DFT Study**

**Yan Li\*, Mingchao Zhang, Lina Geng, Zhiqiang Zhang\***

*School of Chemical Engineering, University of Science and Technology Liaoning,  
Anshan 114051, P. R. China*

***Corresponding person: Yan Li, Zhiqiang Zhang***

***E-mail: [yanli@ustl.edu.cn](mailto:yanli@ustl.edu.cn)***

***[zzq@ustl.edu.com](mailto:zzq@ustl.edu.com)***

***Telephone: 86-412-5929627***

***Fax: 86-412-5929627***

## Content

|                                                                                        |     |
|----------------------------------------------------------------------------------------|-----|
| <b>Computational Details</b> .....                                                     | S2  |
| <b>Table S1</b> Different computational levels.....                                    | S4  |
| <b>Table S2</b> Relative energies (kcal/mol) at different computational levels.....    | S5  |
| <b>Table S3</b> Relative energy barriers of the stereoselective transition states..... | S6  |
| Possible pathways for the oxidation process.....                                       | S7  |
| <b>Fig. S1</b> Generation of the <b>NHC</b> .....                                      | S9  |
| <b>Fig. S2</b> Free energy profiles and optimized structures of step 1 .....           | S10 |
| <b>Fig. S3</b> Possible pathways for the formation of <b>M2</b> .....                  | S11 |
| <b>Fig. S4</b> Conformational search of <b>TS5</b> .....                               | S12 |
| <b>Cartesian Coordinates</b> .....                                                     | S13 |

## Computational Details

### 1. Distortion-interaction model

In the distortion–interaction model, each transition state is divided into two parts (*i.e.* M4-and R2-part), followed by single point energy calculations at the IEF-PCM(THF)/M06-2X-D3/6-311++G(2df,2pd) level of theory. The distortion energies of M4 (R2), denoted as  $\Delta E_{\text{dist}}(\text{M4})$  ( $\Delta E_{\text{dist}}(\text{R2})$ ), is defined as the energy difference between the distorted and the corresponding optimized M4 (R2), *i.e.*  $E_{\text{dist}}(\text{M4/R2}) = E_{(\text{M4/R2})} - E_{(\text{M4/R2\_in TS5})}$ . The total distortion energy  $E_{\text{dist\_total}}$  can be obtained through  $E_{\text{dist\_total}} = E_{\text{dist\_M4}} + E_{\text{dist\_R2}}$ . The activation energy ( $\Delta E_{\text{act}}$ ) can be written as  $\Delta E_{\text{act}} = \Delta E_{\text{dist}} - \Delta E_{\text{int}}$ .

### 2. Global reactivity indexes (GRI) analysis

To disclose the role of the NHC, we performed the global reactivity index (GRI) analyses. The molecular global electrophilicity character is described with the electrophilicity index  $\omega$ , which can be calculated from the expression  $\omega = (\mu^2/2\eta)$  (eV), in which  $\mu$  and  $\eta$  are the electronic chemical potential and the chemical hardness, respectively. The values of  $\mu$  and  $\eta$  can be calculated from the following expressions  $\mu \approx (E_{\text{H}} + E_{\text{L}})/2$  and  $\eta \approx (E_{\text{H}} - E_{\text{L}})$ , in which  $E_{\text{H}}$  is and  $E_{\text{L}}$  are the one-electron energies of the frontier molecular orbital HOMO and LUMO, respectively. Within the Kohn–Sham scheme, Domingo and coworkers introduce relative nucleophilicity index  $N$ , defined as  $N = E_{\text{H}}(\text{Nu}) - E_{\text{H}}(\text{TCE})$ . This nucleophilicity scale takes tetracyanoethylene (TCE) as a reference.

### 3. Calculation of enantiomeric excess (ee)

The extent of enantioselectivity, in terms of enantiomeric excess (ee %), was calculated by using the Boltzmann distribution of diastereomeric transition states with the following equations:

$$\frac{[R]}{[S]} = \frac{\exp(-G_{[R]}^\ddagger)}{\exp(-G_{[S]}^\ddagger)} = \exp(\Delta G^\ddagger / RT) \quad (1)$$

$$ee = \frac{[R]-[S]}{[R]+[S]} \times 100\% = \frac{\frac{[R]}{[S]} - 1}{\frac{[R]}{[S]} + 1} \times 100\% \quad (2)$$

Where  $G^\ddagger$  is the Gibbs free energy barrier of the competing diastereomeric transition state and  $\Delta G^\ddagger$  is the Gibbs free energy difference between the two diastereomeric transition states.

**Table S1.** Different computational levels.

| <b>Level</b> | <b>Optimization</b>        | <b>Single point Energy</b>        | <b>Solvation model</b> |
|--------------|----------------------------|-----------------------------------|------------------------|
| <b>L1</b>    | M062X/6-31G(d,p)           | M062X-D3/6-311++G(2df,2pd)        | IEFPCM                 |
| <b>L2</b>    | M062X/6-31G(d,p)           | M062X-D3/6-311++G(2df,2pd)        | SMD                    |
| <b>L3</b>    | $\omega$ B97X-D/6-31G(d,p) | $\omega$ B97X-D/6-311++G(2df,2pd) | IEFPCM                 |
| <b>L4</b>    | B3LYP-D3/6-31G(d,p)        | B3LYP-D3/6-311++G(2df,2pd)        | IEFPCM                 |
| <b>L5</b>    | M062X/6-31G(d,p)           | M062X-D3/6-311++G(d,p)            | IEFPCM                 |
| <b>L6</b>    | M062X/6-31G(d,p)           | M062X/6-311++G(2df,2pd)           | IEFPCM                 |

**Table S2** Relative energies (kcal/mol) at different computational levels.

| <b>Species</b> | <b>L1</b> | <b>L2</b> | <b>L3</b> | <b>L4</b> | <b>L5</b> | <b>L6</b> |
|----------------|-----------|-----------|-----------|-----------|-----------|-----------|
| <b>TS5(S)</b>  | 0.0       | 0.0       | 0.0       | 0.0       | 0.0       | 0.0       |
| <b>TS5(R)</b>  | 6.8       | 6.1       | 7.1       | 8.2       | 6.9       | 6.8       |

**Table S3** Relative energy barriers (kcal/mol)  $\Delta\Delta G = \Delta G(\text{TS5}(\text{R})) - \Delta G(\text{TS5}(\text{S}))$  of the NHC-catalyzed reaction.

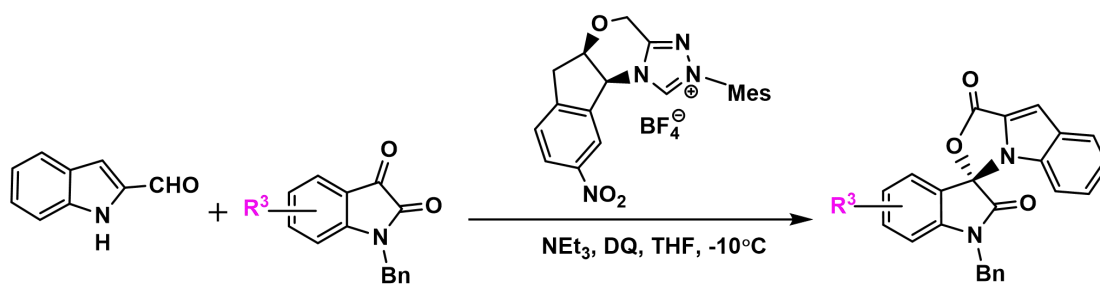

| entry | $\text{R}^3$ | $\Delta\Delta G$<br>(kcal/mol) | <i>ee</i> % in<br>experiment |
|-------|--------------|--------------------------------|------------------------------|
| 1     | 5-MeO        | 7.9                            | 91                           |
| 2     | 5-Me         | 7.7                            | 89                           |
| 3     | 5-F          | 9.2                            | 95                           |
| 4     | 5-Br         | 8.5                            | 91                           |
| 5     | 4-Br         | 9.4                            | 98                           |

### Possible pathways for the oxidation process (M2 → M3).

For the transformation of M2 to M3, we have investigated four possible pathways including HTO (hydride transfer to the oxygen), HTC (hydride transfer to the carbon), SET-HAT (single electron transfer-hydrogen atom transfer), and HAT-SET (hydrogen atom transfer-single electron transfer) pathways (Scheme S1). As presented in Scheme S2, four possible HTC pathways corresponding to the hydride H5 transfers from the O4 atom to four different types of carbon atoms (C2, C3, C4 and C5) of DQ have been investigated. The energy barriers are calculated to be 49.5 ( $TS3^{HCT\_C2}$ ), 20.4 ( $TS3^{HCT}$ ), 31.4 ( $TS3^{HCT\_C4}$ ) and 18.4 ( $TS3^{HCT}$ ), which are much higher than the HTO pathway ( $TS3$ , 7.1 kcal/mol). Therefore, the HCT pathways can be ruled out.

In addition, the energy barrier of SET-HAT pathway (16.0 kcal/mol) is much higher than the HCT pathways (7.1 kcal/mol), thus can be ruled out.

For HAT-SET pathway, the HAT process is exothermic, indicating this process can be take place very easily. However, the SET process needs to absorb 9.2 kcal/mol energy, which is higher than the energy barrier of  $TS3$  (7.1 kcal/mol). Therefore, the HAT-SET pathway can be neglected. Taken together, the HTO pathway (shown in Fig. 1) is the most energetically pathway among the four possibilities.

### Scheme S1. Possible pathways for the oxidation process.

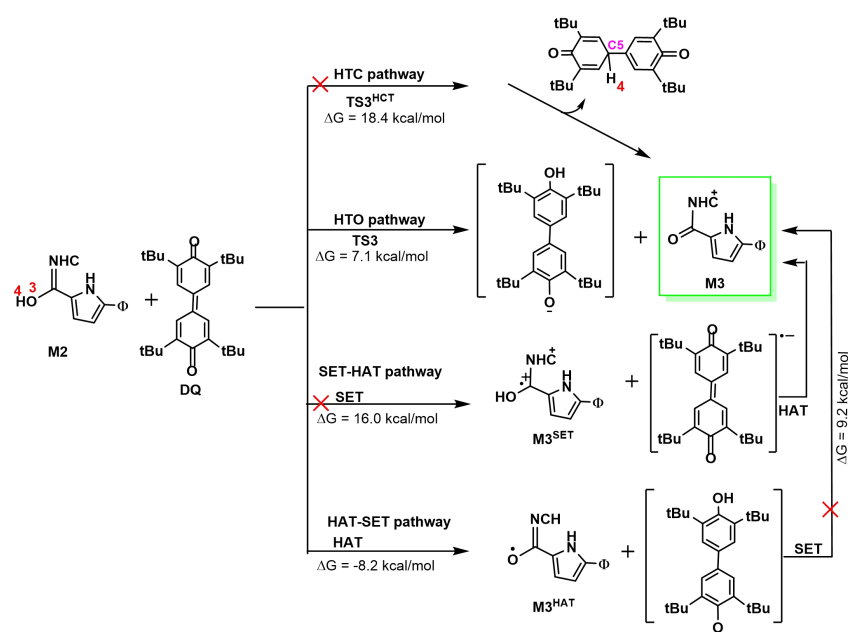



Scheme S2. Other possible HCT pathways.

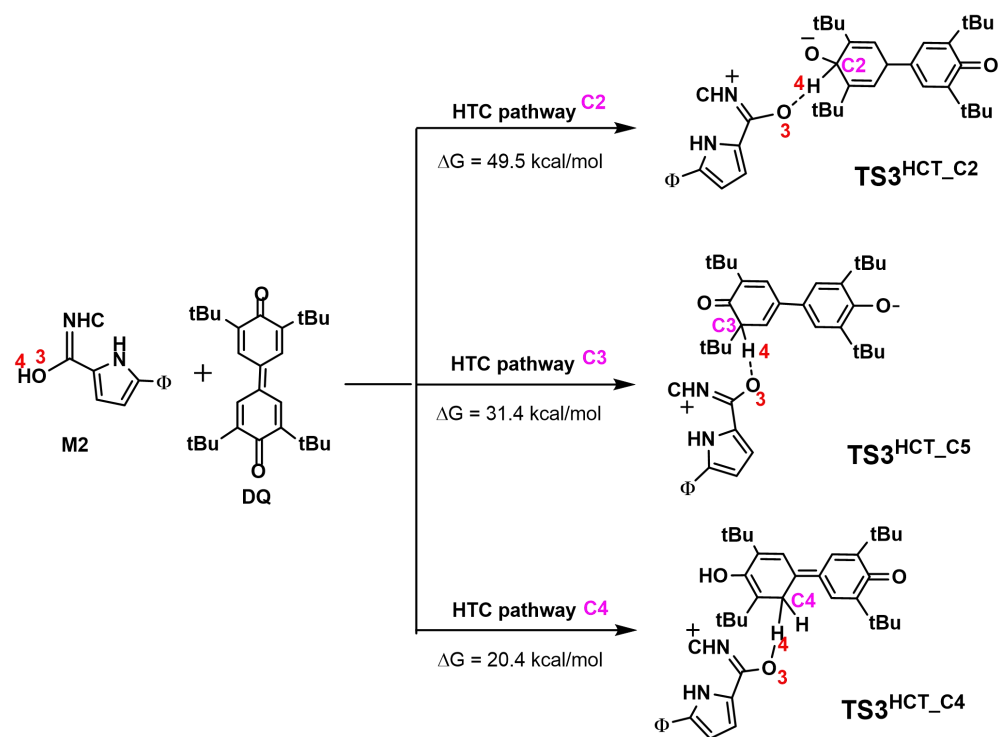

**Fig. S1** The deprotonation of pre-NHC by base  $\text{NEt}_3$  to generate NHC.

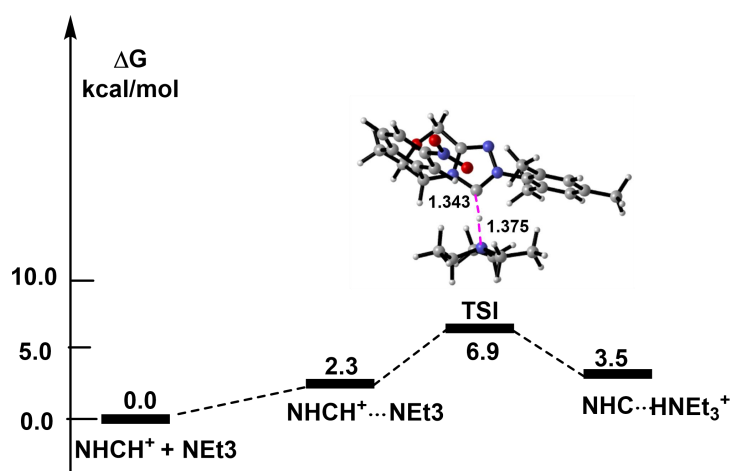

**Fig. S2** Free energy (kcal/mol) profiles for step 1.

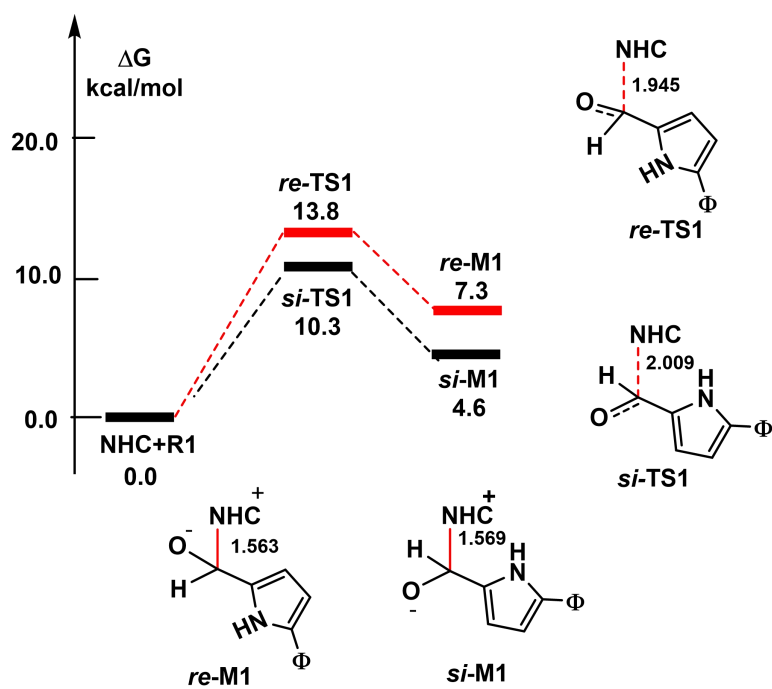

**Fig. S3** Possible pathways for the formation of **M2**. Energies are given in kcal/mol.

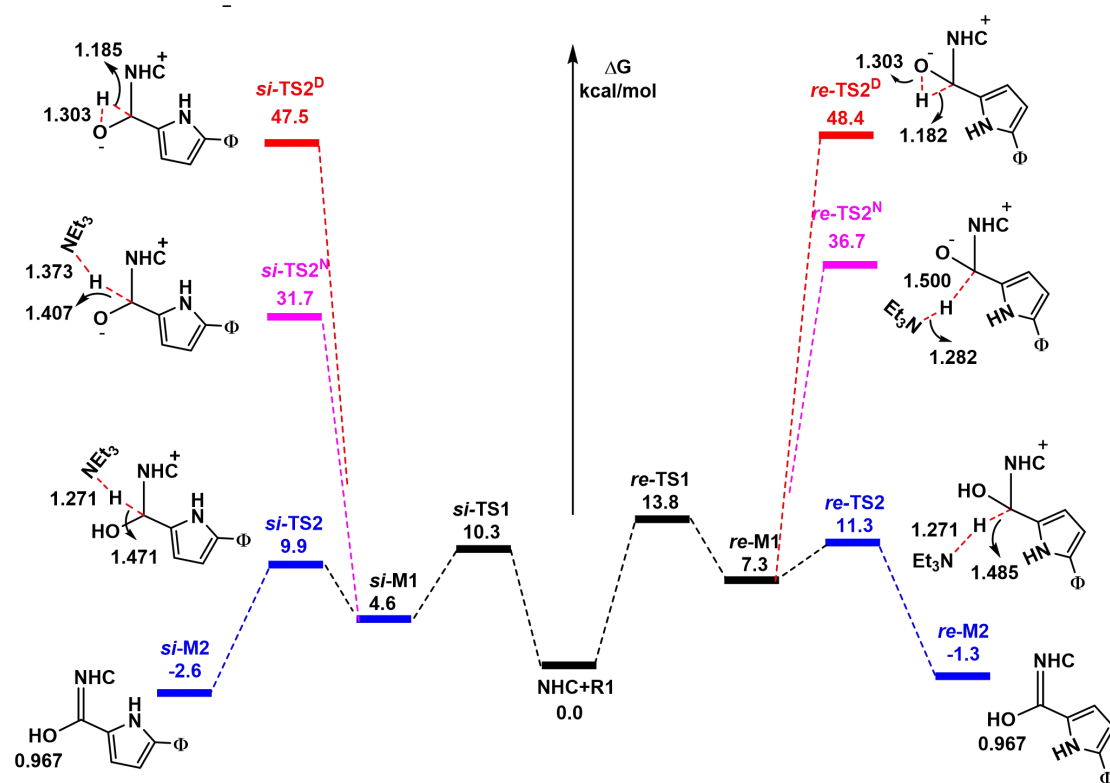

**Fig. S4** Conformational search of **TS5**.

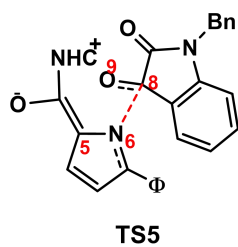

**Table S4. Energies of different conformations of the stereoselective transition states.**

| species        | Dihedral angle<br>C5-C6-N8-O9 | Free energies<br>(a.u.) | relative energies<br>(kcal/mol) |
|----------------|-------------------------------|-------------------------|---------------------------------|
| <b>TS5R</b>    | 6.42                          | -2515.4192092           | 0.0                             |
| <b>TS5R'</b>   | -53.14                        | -2515.4112696           | 5.0                             |
| <b>TS5R''</b>  | 139.18                        | -2515.3992312           | 12.5                            |
| <b>TS5R'''</b> | -62.68                        | -2515.4131211           | 3.9                             |
| <b>TS5S</b>    | 17.23                         | -2515.4083092           | 6.8                             |
| <b>TS5S'</b>   | 54.81                         | -2515.4069197           | 7.7                             |
| <b>TS5S''</b>  | 141.95                        | -2515.3968339           | 14.0                            |
| <b>TS5S'''</b> | -150.02                       | -2515.4041551           | 9.4                             |

## Coordinates

### NHC

|   |             |             |             |
|---|-------------|-------------|-------------|
| C | -1.57720000 | -1.28610300 | -0.26344600 |
| C | -3.32070900 | -2.59395400 | 0.34098500  |
| C | -3.57573400 | -0.20983600 | 0.84228900  |
| H | -2.88718500 | 0.56688900  | 1.18157700  |
| N | -2.52887400 | -3.40723400 | -0.28305100 |
| N | -1.47864700 | -2.57887400 | -0.64353600 |
| N | -2.78229600 | -1.33579900 | 0.38935900  |
| C | -4.63328400 | -2.81159300 | 1.02002600  |
| H | -4.75361400 | -3.85354500 | 1.31576600  |
| H | -5.46496100 | -2.53547600 | 0.35536100  |
| C | -4.57584400 | -0.62340100 | 1.98310800  |
| O | -4.63052300 | -2.02431700 | 2.19980900  |
| C | -5.79974400 | 0.37483400  | 0.13105500  |
| C | -4.46986300 | 0.28360600  | -0.27327300 |
| C | -4.07991700 | 0.55933500  | -1.57453000 |
| C | -5.07898300 | 0.95303100  | -2.45428000 |
| C | -6.41646500 | 1.07510900  | -2.08196300 |
| C | -6.78160200 | 0.77980600  | -0.77332900 |
| C | -5.94905800 | -0.02941900 | 1.57426300  |
| H | -3.04968500 | 0.45744600  | -1.89881400 |
| H | -7.14793300 | 1.38272400  | -2.81837400 |
| H | -7.82093200 | 0.85175300  | -0.47121200 |
| H | -6.74244800 | -0.76682700 | 1.72924000  |
| H | -6.19023800 | 0.83893600  | 2.19523500  |
| C | -0.41759300 | -3.12819900 | -1.43050200 |
| C | -0.30541800 | -2.74058000 | -2.76940700 |
| C | 0.45516900  | -4.04705700 | -0.84002200 |
| C | 0.72994200  | -3.29817700 | -3.52034800 |
| C | 1.47114400  | -4.58053700 | -1.63133600 |
| C | 1.62567200  | -4.21552600 | -2.96998600 |
| H | 0.83285500  | -3.01314800 | -4.56469000 |
| H | 2.16054100  | -5.29631600 | -1.18971600 |
| C | 0.29735900  | -4.43795700 | 0.60526900  |
| H | -0.60523500 | -5.03765500 | 0.75221100  |
| H | 0.19983500  | -3.55081800 | 1.23830400  |
| H | 1.15876600  | -5.01618600 | 0.94362100  |
| C | 2.75292700  | -4.78135400 | -3.79529200 |
| H | 3.00136100  | -5.79768500 | -3.48095500 |
| H | 3.65609600  | -4.17227500 | -3.68568000 |
| H | 2.49465100  | -4.80066000 | -4.85643500 |
| C | -1.26333200 | -1.75164200 | -3.38136100 |
| H | -2.29908800 | -1.98435400 | -3.11530600 |

|           |             |             |             |
|-----------|-------------|-------------|-------------|
| H         | -1.17486500 | -1.75404300 | -4.46916000 |
| H         | -1.05942900 | -0.73898300 | -3.02114900 |
| H         | -4.24014300 | -0.21753700 | 2.93724500  |
| N         | -4.70838600 | 1.23248600  | -3.84631400 |
| O         | -5.58015500 | 1.62542700  | -4.60212500 |
| O         | -3.54744700 | 1.05327500  | -4.17290000 |
| <b>R1</b> |             |             |             |
| C         | -0.23307600 | 1.06972500  | -0.44478600 |
| C         | -1.54671800 | 1.20311000  | 0.08001900  |
| C         | -1.97061800 | 2.46233200  | 0.55174700  |
| C         | -1.09477400 | 3.52531600  | 0.48891000  |
| C         | 0.20939300  | 3.36878500  | -0.03869400 |
| C         | 0.65869100  | 2.15180100  | -0.50995800 |
| C         | -1.23299800 | -0.92950700 | -0.56595900 |
| C         | -2.16102300 | -0.07980500 | -0.00851600 |
| H         | -2.96999900 | 2.58582600  | 0.95705800  |
| H         | -1.40444500 | 4.50126200  | 0.84760900  |
| H         | 0.87124600  | 4.22819300  | -0.07220800 |
| H         | 1.65794900  | 2.03291000  | -0.91527200 |
| N         | -0.06927700 | -0.23174600 | -0.82869100 |
| H         | 0.76794400  | -0.62292900 | -1.23486600 |
| H         | -3.15880600 | -0.36218700 | 0.29382000  |
| C         | -1.36094400 | -2.35306400 | -0.86912700 |
| H         | -0.46785000 | -2.82842700 | -1.32076600 |
| O         | -2.36876400 | -2.99417500 | -0.64852900 |
| <b>R2</b> |             |             |             |
| C         | -0.26248700 | 1.07002200  | -0.44039400 |
| C         | -1.54960400 | 1.24362100  | 0.09197800  |
| C         | -1.97153700 | 2.47714400  | 0.56634100  |
| C         | -1.08170100 | 3.54832600  | 0.50221000  |
| C         | 0.19751800  | 3.36374000  | -0.02745900 |
| C         | 0.63385300  | 2.12426600  | -0.50773800 |
| C         | -1.17881400 | -1.02297000 | -0.61915600 |
| C         | -2.22660400 | -0.05788400 | 0.02152700  |
| H         | -2.97066900 | 2.59102400  | 0.97442200  |
| H         | -1.37876900 | 4.52576900  | 0.86417300  |
| H         | 0.88002800  | 4.20658900  | -0.06731200 |
| H         | 1.63440800  | 1.99619500  | -0.90515700 |
| N         | -0.06601900 | -0.25825000 | -0.86292100 |
| O         | -1.32503600 | -2.20186200 | -0.84740300 |
| C         | 1.15562800  | -0.76479100 | -1.45992300 |
| H         | 1.39956800  | -0.16560700 | -2.34379100 |
| H         | 0.92004700  | -1.77926100 | -1.79514800 |
| C         | 2.32062200  | -0.77487100 | -0.49234200 |

|   |             |             |             |
|---|-------------|-------------|-------------|
| C | 3.56474800  | -0.28064300 | -0.88176700 |
| C | 2.16361900  | -1.29822800 | 0.79297200  |
| C | 4.64383500  | -0.31235000 | -0.00026300 |
| H | 3.69014900  | 0.13328100  | -1.87934300 |
| C | 3.23867300  | -1.32765000 | 1.67495900  |
| H | 1.19506100  | -1.68465200 | 1.10084700  |
| C | 4.48209500  | -0.83490900 | 1.27968300  |
| H | 5.60744400  | 0.07637200  | -0.31342700 |
| H | 3.10767900  | -1.73712500 | 2.67140200  |
| H | 5.32011700  | -0.85690600 | 1.96866100  |
| O | -3.33338100 | -0.39801200 | 0.35808800  |

**NEt<sub>3</sub>**

|   |             |             |             |
|---|-------------|-------------|-------------|
| N | -0.00044900 | -0.00049400 | -0.17731600 |
| C | -1.10400600 | 0.84414900  | 0.28186700  |
| C | -1.04083500 | 2.27575600  | -0.24149500 |
| H | -1.15798700 | 0.85203200  | 1.38911800  |
| H | -2.03469600 | 0.39649100  | -0.07477500 |
| H | -1.99897900 | 2.77278500  | -0.07124200 |
| H | -0.27082600 | 2.87275000  | 0.25169900  |
| H | -0.84069300 | 2.27298100  | -1.31683100 |
| C | -0.17993100 | -1.37804600 | 0.28326000  |
| C | -1.44990300 | -2.04099900 | -0.24119400 |
| H | -0.16162000 | -1.42715300 | 1.39061200  |
| H | 0.67400000  | -1.96024500 | -0.07119600 |
| H | -1.40239000 | -3.11843800 | -0.06519000 |
| H | -2.35346800 | -1.66975800 | 0.24699800  |
| H | -1.54384900 | -1.87206200 | -1.31778300 |
| C | 1.28269300  | 0.53310500  | 0.28197600  |
| C | 2.49139300  | -0.23407500 | -0.24513400 |
| H | 1.31766400  | 0.57260300  | 1.38931500  |
| H | 1.35890200  | 1.56406000  | -0.07164300 |
| H | 3.40073900  | 0.34586800  | -0.06943600 |
| H | 2.62263900  | -1.20285400 | 0.24150400  |
| H | 2.39057200  | -0.39823800 | -1.32185500 |

**HNEt<sub>3</sub><sup>+</sup>**

|   |             |             |             |
|---|-------------|-------------|-------------|
| N | -0.00078800 | -0.00144400 | -0.20292800 |
| C | -0.07836800 | 1.43949900  | 0.24005300  |
| C | 1.13335400  | 2.26199000  | -0.16052300 |
| H | -0.21663700 | 1.41344600  | 1.32382600  |
| H | -0.97907300 | 1.84791600  | -0.21570700 |
| H | 0.90032300  | 3.31151000  | 0.02617400  |
| H | 2.02216100  | 2.01200700  | 0.41920500  |
| H | 1.35620700  | 2.15661200  | -1.22590600 |
| C | -1.20856900 | -0.78656800 | 0.24764900  |



|           |             |             |             |
|-----------|-------------|-------------|-------------|
| C         | -2.52566200 | -0.14891600 | -0.15832800 |
| H         | -1.11551400 | -0.88489100 | 1.33237300  |
| H         | -1.11306500 | -1.77366100 | -0.20245500 |
| H         | -3.31957600 | -0.87442100 | 0.02584100  |
| H         | -2.75526200 | 0.74746000  | 0.41820200  |
| H         | -2.54019400 | 0.09459500  | -1.22455000 |
| C         | 1.28500000  | -0.65374000 | 0.24363800  |
| C         | 1.39500300  | -2.11202100 | -0.16390700 |
| H         | 1.32624600  | -0.52577700 | 1.32827800  |
| H         | 2.09138200  | -0.07660500 | -0.20652300 |
| H         | 2.41618700  | -2.43876600 | 0.03882400  |
| H         | 0.72220400  | -2.75987000 | 0.39828600  |
| H         | 1.21178300  | -2.24265800 | -1.23388100 |
| H         | -0.00449700 | -0.00444000 | -1.22987000 |
| <b>DQ</b> |             |             |             |
| C         | -2.80856700 | 1.28200600  | -0.00297800 |
| C         | -1.45945600 | 1.23519800  | 0.03357600  |
| C         | -0.69348900 | 0.00002000  | 0.01190100  |
| C         | -1.45945800 | -1.23515600 | 0.03363100  |
| C         | -2.80856900 | -1.28196300 | -0.00292100 |
| C         | -3.56965500 | 0.00002000  | -0.08946300 |
| H         | -0.91807200 | 2.16744100  | 0.09051500  |
| H         | -0.91807600 | -2.16739700 | 0.09061200  |
| C         | 0.69347000  | 0.00001800  | -0.01199500 |
| C         | 1.45943800  | -1.23516100 | -0.03367200 |
| C         | 1.45944100  | 1.23519300  | -0.03372600 |
| C         | 2.80854800  | -1.28197000 | 0.00290100  |
| H         | 0.91805300  | -2.16740200 | -0.09063100 |
| C         | 2.80855100  | 1.28199900  | 0.00284500  |
| H         | 0.91806000  | 2.16743400  | -0.09072500 |
| C         | 3.56963500  | 0.00001500  | 0.08941000  |
| O         | 4.78991500  | 0.00001700  | 0.22173900  |
| O         | -4.78993900 | 0.00001900  | -0.22175100 |
| C         | 3.58585400  | -2.59771300 | -0.02875600 |
| C         | 4.55427600  | -2.60437200 | -1.22727000 |
| C         | 4.37260600  | -2.77527800 | 1.28383000  |
| C         | 2.64843000  | -3.80158300 | -0.17949400 |
| H         | 4.00441100  | -2.48412500 | -2.16641600 |
| H         | 5.29346500  | -1.80764000 | -1.14664700 |
| H         | 5.07889400  | -3.56478500 | -1.26325500 |
| H         | 3.69142400  | -2.78332300 | 2.14077600  |
| H         | 4.90056600  | -3.73447900 | 1.26162100  |
| H         | 5.10281500  | -1.97842400 | 1.42094300  |
| H         | 3.24718300  | -4.71591100 | -0.21419100 |

|                        |              |              |              |
|------------------------|--------------|--------------|--------------|
| H                      | 1. 95772300  | -3. 88983300 | 0. 66561300  |
| H                      | 2. 06451200  | -3. 74895000 | -1. 10431400 |
| C                      | 3. 58586100  | 2. 59773800  | -0. 02886900 |
| C                      | 4. 37260600  | 2. 77536300  | 1. 28371400  |
| C                      | 4. 55429100  | 2. 60433900  | -1. 22737800 |
| C                      | 2. 64844200  | 3. 80160400  | -0. 17967100 |
| H                      | 3. 69141800  | 2. 78345400  | 2. 14065500  |
| H                      | 5. 10280800  | 1. 97851100  | 1. 42087000  |
| H                      | 4. 90057100  | 3. 73456000  | 1. 26146100  |
| H                      | 4. 00443200  | 2. 48404500  | -2. 16652100 |
| H                      | 5. 07890800  | 3. 56475100  | -1. 26340600 |
| H                      | 5. 29348100  | 1. 80761200  | -1. 14671200 |
| H                      | 3. 24719700  | 4. 71592900  | -0. 21440700 |
| H                      | 2. 06453000  | 3. 74892800  | -1. 10449200 |
| H                      | 1. 95772800  | 3. 88989600  | 0. 66542700  |
| C                      | -3. 58587100 | 2. 59775100  | 0. 02867200  |
| C                      | -4. 55431000 | 2. 60441300  | 1. 22717200  |
| C                      | -2. 64844500 | 3. 80161800  | 0. 17942500  |
| C                      | -4. 37260400 | 2. 77531700  | -1. 28392500 |
| H                      | -5. 29351800 | 1. 80769900  | 1. 14652600  |
| H                      | -4. 00446000 | 2. 48413700  | 2. 16632400  |
| H                      | -5. 07890700 | 3. 56483700  | 1. 26316500  |
| H                      | -1. 95774000 | 3. 88987800  | -0. 66568300 |
| H                      | -3. 24719600 | 4. 71594600  | 0. 21413600  |
| H                      | -2. 06452400 | 3. 74897000  | 1. 10424200  |
| H                      | -4. 90056600 | 3. 73451800  | -1. 26172100 |
| H                      | -3. 69141100 | 2. 78336500  | -2. 14086200 |
| H                      | -5. 10280800 | 1. 97846200  | -1. 42104900 |
| C                      | -3. 58587500 | -2. 59770500 | 0. 02878700  |
| C                      | -4. 55430400 | -2. 60431700 | 1. 22729600  |
| C                      | -4. 37261900 | -2. 77532300 | -1. 28379700 |
| C                      | -2. 64845200 | -3. 80156900 | 0. 17958100  |
| H                      | -4. 00444700 | -2. 48400600 | 2. 16643800  |
| H                      | -5. 29351000 | -1. 80760500 | 1. 14662500  |
| H                      | -5. 07890300 | -3. 56473800 | 1. 26333100  |
| H                      | -3. 69143300 | -2. 78340100 | -2. 14073900 |
| H                      | -4. 90057700 | -3. 73452500 | -1. 26155200 |
| H                      | -5. 10282800 | -1. 97847600 | -1. 42094400 |
| H                      | -3. 24720500 | -4. 71589500 | 0. 21432100  |
| H                      | -1. 95774400 | -3. 88985900 | -0. 66552200 |
| H                      | -2. 06453300 | -3. 74889200 | 1. 10439800  |
| <b>DQH<sup>-</sup></b> |              |              |              |
| H                      | -2. 99768600 | 3. 20904600  | 12. 87291000 |
| C                      | -2. 88312000 | 2. 01102000  | 10. 72712100 |

|   |             |             |             |
|---|-------------|-------------|-------------|
| C | -2.91072700 | 1.12040000  | 9.65189600  |
| C | -3.30726100 | -0.21449900 | 9.77807300  |
| C | -3.70113200 | -0.64368000 | 11.05141200 |
| C | -3.71952300 | 0.19430900  | 12.16577600 |
| C | -3.30122400 | 1.52788400  | 11.98351000 |
| H | -2.63268100 | 1.47214100  | 8.66621800  |
| H | -3.97890400 | -1.68421900 | 11.16714300 |
| C | -3.30060600 | -1.13417900 | 8.62070900  |
| C | -4.21990700 | -2.18777100 | 8.50959400  |
| C | -2.36769800 | -0.99410300 | 7.58279300  |
| C | -4.22869200 | -3.07849400 | 7.44515400  |
| H | -4.97456700 | -2.28202400 | 9.28607600  |
| C | -2.31654000 | -1.84285800 | 6.48647000  |
| H | -1.63491600 | -0.19633400 | 7.66888100  |
| C | -3.24842200 | -2.95084100 | 6.38154700  |
| O | -3.32305100 | 2.33412400  | 13.09874400 |
| O | -3.21065600 | -3.77047900 | 5.40025800  |
| C | -4.16147400 | -0.32509500 | 13.54394100 |
| C | -3.00934300 | -0.20565200 | 14.55886100 |
| C | -5.38977300 | 0.46027600  | 14.03981200 |
| C | -4.56358500 | -1.80573200 | 13.49048100 |
| H | -2.14887900 | -0.79481900 | 14.22514500 |
| H | -2.69239900 | 0.82885000  | 14.69018200 |
| H | -3.33156900 | -0.59773700 | 15.53013100 |
| H | -6.21823800 | 0.35167800  | 13.33215800 |
| H | -5.71682900 | 0.06307600  | 15.00744400 |
| H | -5.16997400 | 1.52132800  | 14.15642000 |
| H | -4.87950200 | -2.12403000 | 14.48880200 |
| H | -5.39877000 | -1.97712800 | 12.80404200 |
| H | -3.72849100 | -2.44365500 | 13.18494400 |
| C | -2.41879100 | 3.46670100  | 10.53149100 |
| C | -3.55845400 | 4.45777500  | 10.85397400 |
| C | -1.15883400 | 3.75318700  | 11.37832900 |
| C | -2.01606000 | 3.74686100  | 9.07582500  |
| H | -4.39019900 | 4.29509800  | 10.16243300 |
| H | -3.96957200 | 4.37205300  | 11.86335800 |
| H | -3.20456900 | 5.48607300  | 10.72787000 |
| H | -0.34007900 | 3.10975600  | 11.04367800 |
| H | -0.85106300 | 4.79551600  | 11.24692900 |
| H | -1.27502400 | 3.57740400  | 12.45123400 |
| H | -1.68299500 | 4.78586400  | 8.99248200  |
| H | -1.19277700 | 3.10265100  | 8.75378100  |
| H | -2.85567900 | 3.60705000  | 8.38923600  |
| C | -1.27848300 | -1.63984100 | 5.37598200  |

|   |             |             |            |
|---|-------------|-------------|------------|
| C | -1.99697100 | -1.42117400 | 4.03186300 |
| C | -0.38155100 | -0.42091100 | 5.62287100 |
| C | -0.36670100 | -2.87502200 | 5.27409500 |
| H | -2.65154300 | -2.26775000 | 3.82274500 |
| H | -2.59900800 | -0.50616400 | 4.06972700 |
| H | -1.26633300 | -1.31316400 | 3.22021600 |
| H | 0.19936500  | -0.52224000 | 6.54602900 |
| H | 0.32595300  | -0.31695200 | 4.79280800 |
| H | -0.96297300 | 0.50553200  | 5.68633900 |
| H | 0.35946500  | -2.75039200 | 4.46067800 |
| H | 0.19085400  | -3.01100700 | 6.20775500 |
| H | -0.97113500 | -3.76298600 | 5.08946900 |
| C | -5.26642400 | -4.20478000 | 7.36234700 |
| C | -6.08550000 | -4.06902400 | 6.06619000 |
| C | -4.55544500 | -5.56960500 | 7.37744200 |
| C | -6.25373300 | -4.18495200 | 8.53515600 |
| H | -6.64639900 | -3.12755800 | 6.07118000 |
| H | -5.41656100 | -4.07966100 | 5.20537900 |
| H | -6.80627000 | -4.89222500 | 5.98132800 |
| H | -4.02301600 | -5.70753900 | 8.32517700 |
| H | -5.28585100 | -6.38269300 | 7.27762700 |
| H | -3.84009500 | -5.62192700 | 6.55669700 |
| H | -6.97019500 | -5.00586400 | 8.41993200 |
| H | -5.74783900 | -4.31590000 | 9.49798100 |
| H | -6.82103600 | -3.24861900 | 8.57253900 |

**re-TS1**

|   |             |             |            |
|---|-------------|-------------|------------|
| C | -4.52742200 | -6.61944000 | 1.11489700 |
| C | -5.69986900 | -8.26168800 | 2.04380700 |
| C | -5.45050700 | -6.18490300 | 3.40679100 |
| H | -4.51384900 | -5.71311900 | 3.71333400 |
| N | -5.43343700 | -8.69153700 | 0.84750900 |
| N | -4.71430600 | -7.65457800 | 0.29245900 |
| N | -5.15754800 | -7.02344600 | 2.24640200 |
| C | -6.48111200 | -8.89776400 | 3.14757200 |
| H | -6.35120200 | -9.97999800 | 3.13377100 |
| H | -7.55009700 | -8.67552100 | 3.02614700 |
| C | -6.08473000 | -7.02517400 | 4.57293700 |
| O | -5.98229400 | -8.42325700 | 4.38312200 |
| C | -7.70321300 | -5.39968300 | 3.75279300 |
| C | -6.52955200 | -5.19984000 | 3.03102500 |
| C | -6.46340400 | -4.28313700 | 1.99609300 |
| C | -7.61097800 | -3.56417300 | 1.70820500 |
| C | -8.79374000 | -3.70898600 | 2.43042500 |
| C | -8.83772400 | -4.63728100 | 3.46530100 |

|   |             |             |             |
|---|-------------|-------------|-------------|
| C | -7.54128600 | -6.51266000 | 4.75351100  |
| H | -5.56129600 | -4.14322200 | 1.41705200  |
| H | -9.66003600 | -3.11709500 | 2.16210200  |
| H | -9.75768500 | -4.78084100 | 4.02181100  |
| H | -8.26574300 | -7.31563400 | 4.58414100  |
| H | -7.70007500 | -6.15964400 | 5.77583600  |
| C | -4.29951600 | -7.74978200 | -1.08111500 |
| C | -5.12837000 | -7.20740600 | -2.06167600 |
| C | -3.07949000 | -8.36745300 | -1.36617200 |
| C | -4.69848200 | -7.29699800 | -3.38706800 |
| C | -2.69809300 | -8.44007800 | -2.70204400 |
| C | -3.49229600 | -7.90738100 | -3.72221200 |
| H | -5.31553900 | -6.86327700 | -4.16991200 |
| H | -1.74726200 | -8.90531000 | -2.95321600 |
| C | -2.20514800 | -8.86384800 | -0.24721600 |
| H | -2.72336600 | -9.61959000 | 0.35189400  |
| H | -1.94450200 | -8.03215100 | 0.42009900  |
| H | -1.28772600 | -9.30456600 | -0.64183500 |
| C | -3.03805300 | -7.98763700 | -5.15629900 |
| H | -3.02572800 | -9.02447200 | -5.50713000 |
| H | -2.02512000 | -7.58844500 | -5.26193500 |
| H | -3.69610900 | -7.41075600 | -5.80961500 |
| C | -6.42746300 | -6.53832000 | -1.69871000 |
| H | -7.05469900 | -7.19671200 | -1.08959200 |
| H | -6.98220800 | -6.26335200 | -2.59732800 |
| H | -6.24921600 | -5.62697400 | -1.11644500 |
| H | -5.50840400 | -6.83579300 | 5.47830300  |
| N | -7.57292000 | -2.64829700 | 0.56579400  |
| O | -8.51286500 | -1.89654500 | 0.40132700  |
| O | -6.59731700 | -2.69630700 | -0.17310700 |
| C | -3.59896300 | -4.24524800 | -2.23976200 |
| C | -2.34972400 | -4.88939000 | -2.42591500 |
| C | -1.82450400 | -4.98128900 | -3.72435400 |
| C | -2.54740400 | -4.45310000 | -4.78116900 |
| C | -3.78948700 | -3.81996000 | -4.57007000 |
| C | -4.33004700 | -3.70109800 | -3.29958700 |
| C | -2.91263300 | -5.01920100 | -0.24876200 |
| C | -1.93190000 | -5.36050200 | -1.13706900 |
| H | -0.87241200 | -5.47609900 | -3.89599200 |
| H | -2.15655400 | -4.52938300 | -5.79117300 |
| H | -4.33186800 | -3.41693500 | -5.41976000 |
| H | -5.28809300 | -3.21883000 | -3.12892000 |
| N | -3.90979100 | -4.32366300 | -0.90372700 |
| H | -4.72876500 | -3.90302900 | -0.48500000 |

|               |              |              |             |
|---------------|--------------|--------------|-------------|
| H             | -1.04889000  | -5.93174900  | -0.89014100 |
| C             | -3.02110200  | -5.39191800  | 1.19804300  |
| H             | -3.56642200  | -4.61375500  | 1.78042000  |
| O             | -2.09990600  | -6.03746100  | 1.75282500  |
| <b>si-TS1</b> |              |              |             |
| C             | -4.74320000  | -6.90185400  | 0.80066800  |
| C             | -6.54976600  | -8.16271700  | 1.09193800  |
| C             | -6.47005200  | -6.17227800  | 2.53762100  |
| H             | -5.65007200  | -5.62091600  | 2.99774800  |
| N             | -5.88776900  | -8.77193900  | 0.15683300  |
| N             | -4.78130300  | -7.96850600  | -0.00756000 |
| N             | -5.88688900  | -7.03966200  | 1.51399500  |
| C             | -7.78604300  | -8.55051400  | 1.83200900  |
| H             | -8.01355600  | -9.60446100  | 1.67471600  |
| H             | -8.64634900  | -7.94725900  | 1.51008200  |
| C             | -7.28908100  | -7.01172200  | 3.58756100  |
| O             | -7.49693400  | -8.36350000  | 3.20666500  |
| C             | -8.69274800  | -5.27172100  | 2.63355800  |
| C             | -7.48471900  | -5.22516600  | 1.94086800  |
| C             | -7.30004800  | -4.39016100  | 0.84867800  |
| C             | -8.38507900  | -3.60546000  | 0.47852400  |
| C             | -9.60757300  | -3.62528600  | 1.14823800  |
| C             | -9.76279700  | -4.46881200  | 2.24077700  |
| C             | -8.62257000  | -6.24776900  | 3.77719300  |
| H             | -6.35480300  | -4.34817600  | 0.31725400  |
| H             | -10.41253400 | -2.98719800  | 0.80644500  |
| H             | -10.70714000 | -4.50137500  | 2.77372300  |
| H             | -9.46200600  | -6.94946600  | 3.79354200  |
| H             | -8.62662100  | -5.71605300  | 4.73392100  |
| C             | -3.78194900  | -8.33732100  | -0.96727800 |
| C             | -3.97550900  | -7.97131200  | -2.30161400 |
| C             | -2.64379600  | -9.00767500  | -0.51669100 |
| C             | -2.97802300  | -8.31242900  | -3.21095500 |
| C             | -1.66150100  | -9.30992500  | -1.46200900 |
| C             | -1.81571100  | -8.97641000  | -2.80875500 |
| H             | -3.09582400  | -8.02317100  | -4.25236700 |
| H             | -0.76029900  | -9.82457300  | -1.13828400 |
| C             | -2.48286800  | -9.36874200  | 0.93665500  |
| H             | -3.35950600  | -9.91087900  | 1.30313600  |
| H             | -2.37226700  | -8.47318400  | 1.55721100  |
| H             | -1.60126200  | -9.99475400  | 1.08171400  |
| C             | -0.75815100  | -9.33841000  | -3.81875300 |
| H             | -1.02370500  | -10.26499900 | -4.33772400 |
| H             | 0.21188700   | -9.48996700  | -3.34088600 |

|   |             |             |             |
|---|-------------|-------------|-------------|
| H | -0.65388800 | -8.55815200 | -4.57734400 |
| C | -5.18051000 | -7.16731500 | -2.70469100 |
| H | -6.10777800 | -7.70177900 | -2.47740200 |
| H | -5.15516200 | -6.94225000 | -3.77216300 |
| H | -5.20041300 | -6.21846400 | -2.15408600 |
| H | -6.73231100 | -7.07814200 | 4.52230400  |
| N | -8.23885800 | -2.70783400 | -0.67311900 |
| O | -9.19665800 | -2.02338300 | -0.98983100 |
| O | -7.16742100 | -2.69400300 | -1.25546800 |
| C | -2.57763300 | -4.90628500 | -2.46632600 |
| C | -3.52352500 | -3.85086700 | -2.41382800 |
| C | -3.75663300 | -3.09065800 | -3.57262500 |
| C | -3.05985100 | -3.39769400 | -4.72827200 |
| C | -2.12296800 | -4.45200900 | -4.75643200 |
| C | -1.86756600 | -5.21793100 | -3.63157200 |
| C | -3.44760400 | -4.85548900 | -0.39685400 |
| C | -4.05308700 | -3.83340000 | -1.08136700 |
| H | -4.47936100 | -2.28016200 | -3.55707800 |
| H | -3.23488400 | -2.82165300 | -5.63127700 |
| H | -1.59203800 | -4.66693300 | -5.67837400 |
| H | -1.14956500 | -6.03235700 | -3.64740700 |
| N | -2.54063300 | -5.48656100 | -1.22203400 |
| H | -2.01061300 | -6.31338400 | -0.98316800 |
| H | -4.77902200 | -3.14745900 | -0.67089700 |
| C | -3.63821200 | -5.24087400 | 1.04038200  |
| H | -2.77144300 | -5.80606600 | 1.43996800  |
| O | -4.29695900 | -4.47198400 | 1.77828400  |

**re-M1**

|   |             |             |             |
|---|-------------|-------------|-------------|
| C | -4.68457200 | -6.31908100 | 0.77325000  |
| C | -6.10326100 | -7.77171800 | 1.61111800  |
| C | -5.44910900 | -5.94553600 | 3.14855100  |
| H | -4.49436700 | -5.41476200 | 3.23333400  |
| N | -5.84993100 | -8.21486600 | 0.41637200  |
| N | -4.96976500 | -7.28968600 | -0.09835700 |
| N | -5.40988400 | -6.62494000 | 1.86304200  |
| C | -6.85572300 | -8.35486300 | 2.76147600  |
| H | -7.09085700 | -9.40238500 | 2.57779600  |
| H | -7.78696200 | -7.80200200 | 2.94575100  |
| C | -5.61645600 | -6.99241000 | 4.31372200  |
| O | -5.97338000 | -8.29396600 | 3.87024100  |
| C | -7.35497300 | -5.30447200 | 4.45548500  |
| C | -6.66603600 | -5.05581200 | 3.26867000  |
| C | -7.11913400 | -4.11870900 | 2.35223200  |
| C | -8.27922500 | -3.42885000 | 2.68178400  |

|   |             |             |             |
|---|-------------|-------------|-------------|
| C | -8.98247600 | -3.64226400 | 3.86429700  |
| C | -8.51466800 | -4.59523400 | 4.76134100  |
| C | -6.67670000 | -6.38062500 | 5.25866200  |
| H | -6.61666100 | -3.92435500 | 1.41053900  |
| H | -9.88221900 | -3.07316300 | 4.06066900  |
| H | -9.05518200 | -4.78735800 | 5.68195400  |
| H | -7.36612600 | -7.15441000 | 5.60787100  |
| H | -6.19490600 | -5.95027200 | 6.14244600  |
| C | -4.37124900 | -7.54661600 | -1.38479200 |
| C | -5.06242000 | -7.18787900 | -2.53887100 |
| C | -3.11933700 | -8.16858500 | -1.39669600 |
| C | -4.44166100 | -7.44915900 | -3.76187400 |
| C | -2.54489700 | -8.40995300 | -2.64013200 |
| C | -3.18569100 | -8.04803400 | -3.82893200 |
| H | -4.94602200 | -7.15540300 | -4.67870800 |
| H | -1.56183400 | -8.87324300 | -2.68393400 |
| C | -2.42862500 | -8.52131400 | -0.10655700 |
| H | -3.01680100 | -9.25240600 | 0.45953200  |
| H | -2.30210200 | -7.63460900 | 0.52941200  |
| H | -1.44719500 | -8.95551200 | -0.30600700 |
| C | -2.52324000 | -8.30829800 | -5.15646100 |
| H | -2.56895700 | -9.37122300 | -5.41555500 |
| H | -1.46960000 | -8.01832100 | -5.12459400 |
| H | -3.00680700 | -7.74071000 | -5.95444500 |
| C | -6.41778800 | -6.53998600 | -2.46362000 |
| H | -7.16209100 | -7.23325100 | -2.05955500 |
| H | -6.74614400 | -6.21934000 | -3.45363500 |
| H | -6.39947900 | -5.66438800 | -1.80702700 |
| H | -4.66082000 | -7.13385600 | 4.81768900  |
| N | -8.79151200 | -2.43603100 | 1.73003600  |
| O | -9.79334700 | -1.81507700 | 2.03721300  |
| O | -8.18676000 | -2.28794900 | 0.68176700  |
| C | -3.39401100 | -4.37797800 | -2.73420400 |
| C | -2.10741200 | -4.94977800 | -2.56537800 |
| C | -1.30956900 | -5.15794100 | -3.70084000 |
| C | -1.80262200 | -4.80150900 | -4.94574700 |
| C | -3.08103000 | -4.22540100 | -5.08548400 |
| C | -3.89137400 | -4.00047800 | -3.98370700 |
| C | -3.13348700 | -4.89643500 | -0.56163000 |
| C | -1.96290900 | -5.24814200 | -1.16776200 |
| H | -0.32594700 | -5.60909400 | -3.60303000 |
| H | -1.19861200 | -4.97095800 | -5.83196400 |
| H | -3.43836100 | -3.95529500 | -6.07428200 |
| H | -4.88197600 | -3.56772700 | -4.08692500 |



|              |              |             |             |
|--------------|--------------|-------------|-------------|
| N            | -3.99202800  | -4.34931100 | -1.49562400 |
| H            | -4.87302200  | -3.90589900 | -1.28312000 |
| H            | -1.13565600  | -5.73655100 | -0.67404600 |
| C            | -3.60898100  | -5.18703900 | 0.84461500  |
| H            | -4.22898100  | -4.29514000 | 1.15011600  |
| O            | -2.70291900  | -5.58892000 | 1.72330300  |
| <b>si-M1</b> |              |             |             |
| C            | -4.78674000  | -6.72157100 | 0.84203900  |
| C            | -6.48385100  | -8.03881300 | 1.27278600  |
| C            | -6.41902500  | -6.00379400 | 2.69245100  |
| H            | -5.57236300  | -5.47071900 | 3.12132800  |
| N            | -5.85717800  | -8.62767700 | 0.29912900  |
| N            | -4.80671500  | -7.79205500 | 0.04279300  |
| N            | -5.85916900  | -6.87768300 | 1.64367100  |
| C            | -7.65259500  | -8.49341100 | 2.07993100  |
| H            | -7.80015900  | -9.56626300 | 1.96095900  |
| H            | -8.56938500  | -7.97031500 | 1.77450500  |
| C            | -7.24102100  | -6.85214500 | 3.73812800  |
| O            | -7.32160000  | -8.23453100 | 3.43003800  |
| C            | -8.67714800  | -5.17794300 | 2.71044400  |
| C            | -7.42993600  | -5.04766800 | 2.10454200  |
| C            | -7.19692300  | -4.12471500 | 1.09386700  |
| C            | -8.28758900  | -3.37030300 | 0.68552900  |
| C            | -9.55619400  | -3.48497000 | 1.25389500  |
| C            | -9.75075100  | -4.39407200 | 2.28570500  |
| C            | -8.64140400  | -6.19240800 | 3.82027700  |
| H            | -6.18893400  | -3.99108500 | 0.70766900  |
| H            | -10.36278800 | -2.86252900 | 0.88791300  |
| H            | -10.72651300 | -4.48990800 | 2.74978000  |
| H            | -9.42524500  | -6.95143800 | 3.73292200  |
| H            | -8.77904200  | -5.70451400 | 4.78957700  |
| C            | -3.88055500  | -8.09943700 | -1.01157100 |
| C            | -4.23371800  | -7.75473600 | -2.32014500 |
| C            | -2.66655200  | -8.69552300 | -0.67232500 |
| C            | -3.28355400  | -7.98277300 | -3.31081900 |
| C            | -1.75084200  | -8.90774700 | -1.70490800 |
| C            | -2.03775800  | -8.54568800 | -3.02128000 |
| H            | -3.51174000  | -7.69078900 | -4.33332100 |
| H            | -0.79239200  | -9.36425800 | -1.47130900 |
| C            | -2.35463600  | -9.07887400 | 0.75106900  |
| H            | -3.18036200  | -9.63987000 | 1.19774900  |
| H            | -2.18290300  | -8.19627700 | 1.37726500  |
| H            | -1.45625000  | -9.69626200 | 0.79099300  |
| C            | -1.03187400  | -8.74783700 | -4.12358100 |

|   |             |             |             |
|---|-------------|-------------|-------------|
| H | -1.38875800 | -9.48741700 | -4.84653400 |
| H | -0.07298500 | -9.09102800 | -3.73021900 |
| H | -0.87098900 | -7.80984600 | -4.66353800 |
| C | -5.58475200 | -7.17773100 | -2.64479700 |
| H | -6.33848400 | -7.97031100 | -2.69358500 |
| H | -5.55438200 | -6.66742100 | -3.60905600 |
| H | -5.90208200 | -6.45471800 | -1.88944000 |
| H | -6.73149800 | -6.82067800 | 4.70052100  |
| N | -8.09541700 | -2.39583500 | -0.39491200 |
| O | -9.03876400 | -1.68623700 | -0.70036600 |
| O | -7.00362300 | -2.34911400 | -0.93597900 |
| C | -2.12631800 | -5.04423500 | -2.35093200 |
| C | -3.33746500 | -4.35836700 | -2.62205700 |
| C | -3.53617300 | -3.82613500 | -3.90837600 |
| C | -2.54968000 | -3.99116000 | -4.86598300 |
| C | -1.35032200 | -4.67217200 | -4.56853200 |
| C | -1.12044100 | -5.20262200 | -3.30977500 |
| C | -3.40596800 | -5.13420500 | -0.50422100 |
| C | -4.12413000 | -4.41383300 | -1.42316500 |
| H | -4.45500100 | -3.29778000 | -4.14548700 |
| H | -2.69582800 | -3.58841400 | -5.86316800 |
| H | -0.59444100 | -4.78216800 | -5.33992400 |
| H | -0.20292900 | -5.73479800 | -3.07626800 |
| N | -2.19220900 | -5.48613400 | -1.05361700 |
| H | -1.50397100 | -6.07218300 | -0.60494500 |
| H | -5.10283100 | -3.98078700 | -1.26492400 |
| C | -3.78309800 | -5.51878300 | 0.92648000  |
| H | -2.86589400 | -6.01547300 | 1.35247600  |
| O | -4.30350300 | -4.54027900 | 1.64946000  |

**M02**

|   |             |             |             |
|---|-------------|-------------|-------------|
| C | 0.17011700  | -0.22824100 | 0.44131900  |
| C | -1.08317800 | -1.73622400 | 1.39647700  |
| C | -1.47038100 | 0.53098400  | 2.29984600  |
| H | -0.80520000 | 1.36431300  | 2.51728600  |
| N | -0.42688700 | -2.38100400 | 0.47924600  |
| N | 0.34249400  | -1.42858200 | -0.11246200 |
| N | -0.74464100 | -0.40673000 | 1.41516000  |
| C | -2.01231000 | -2.24418500 | 2.44850300  |
| H | -1.86159000 | -3.31333800 | 2.59287600  |
| H | -3.05930900 | -2.06397400 | 2.17036500  |
| C | -1.93490000 | -0.19041000 | 3.62637800  |
| O | -1.65417700 | -1.57717600 | 3.64258900  |
| C | -3.85973900 | 0.72343900  | 2.45200700  |
| C | -2.75563200 | 0.97191800  | 1.63871400  |

|   |             |             |             |
|---|-------------|-------------|-------------|
| C | -2.89148100 | 1.53352500  | 0.37877500  |
| C | -4.17994300 | 1.82748500  | -0.04024500 |
| C | -5.30693200 | 1.59662200  | 0.74478900  |
| C | -5.14344000 | 1.04022700  | 2.00816800  |
| C | -3.44560000 | 0.11976300  | 3.76555000  |
| H | -2.03756100 | 1.75058500  | -0.24948100 |
| H | -6.28681800 | 1.84816200  | 0.35866200  |
| H | -6.00869900 | 0.84713800  | 2.63295500  |
| H | -4.00066500 | -0.79053600 | 4.01179700  |
| H | -3.61370700 | 0.82668800  | 4.58313600  |
| C | 1.15037300  | -1.76765200 | -1.25927800 |
| C | 0.53323400  | -1.76357600 | -2.51408600 |
| C | 2.49933300  | -2.05825700 | -1.05831900 |
| C | 1.34970800  | -2.01377500 | -3.61366700 |
| C | 3.26939100  | -2.30578700 | -2.19487300 |
| C | 2.71488200  | -2.27497400 | -3.47521800 |
| H | 0.91118200  | -1.97977700 | -4.60830900 |
| H | 4.32693400  | -2.52460200 | -2.07318200 |
| C | 3.08779100  | -2.09884800 | 0.32524200  |
| H | 2.66653400  | -2.93242800 | 0.89833300  |
| H | 2.87813700  | -1.18148100 | 0.88834200  |
| H | 4.17002400  | -2.23105400 | 0.28017200  |
| C | 3.56066300  | -2.52140500 | -4.69566000 |
| H | 3.38678000  | -1.74149200 | -5.44233200 |
| H | 3.30625200  | -3.48167700 | -5.15444200 |
| H | 4.62358200  | -2.53515000 | -4.44707200 |
| C | -0.94276500 | -1.52403600 | -2.68487500 |
| H | -1.49163100 | -2.46685100 | -2.59396700 |
| H | -1.14050000 | -1.10343100 | -3.67273100 |
| H | -1.34316200 | -0.83131800 | -1.94020500 |
| H | -1.36951500 | 0.21053600  | 4.46823100  |
| N | -4.35459900 | 2.40523100  | -1.37864800 |
| O | -5.47934400 | 2.71414200  | -1.72371000 |
| O | -3.36025500 | 2.54020100  | -2.07351500 |
| C | 2.08670100  | 1.19823900  | -3.39537800 |
| C | 0.73407500  | 1.55800000  | -3.60223000 |
| C | 0.27484800  | 1.76658800  | -4.91580900 |
| C | 1.16178200  | 1.60631200  | -5.96274400 |
| C | 2.50958600  | 1.24982200  | -5.73117500 |
| C | 2.99279200  | 1.04389300  | -4.45248700 |
| C | 1.06720800  | 1.22908200  | -1.40378400 |
| C | 0.10675800  | 1.58650200  | -2.31496700 |
| H | -0.76012800 | 2.03961800  | -5.09730200 |
| H | 0.82339900  | 1.75635500  | -6.98248200 |

|               |             |             |             |
|---------------|-------------|-------------|-------------|
| H             | 3.17966800  | 1.13274500  | -6.57691500 |
| H             | 4.02489200  | 0.75960800  | -4.27233600 |
| N             | 2.26738300  | 1.02516100  | -2.04673700 |
| H             | 3.12114900  | 0.70329300  | -1.61546900 |
| H             | -0.92936500 | 1.82099400  | -2.10828400 |
| C             | 0.91786600  | 1.04501500  | 0.07989400  |
| H             | 0.51618900  | 2.92862500  | 0.32520600  |
| O             | 0.16197600  | 2.08936500  | 0.65113200  |
| N             | 2.65369200  | 0.09559000  | 2.98915200  |
| C             | 2.41590100  | 1.50930800  | 3.27451400  |
| C             | 2.15267700  | 1.90925900  | 4.73036200  |
| H             | 1.55375500  | 1.84083400  | 2.67743100  |
| H             | 3.28036500  | 2.06350900  | 2.88932500  |
| H             | 2.01336900  | 2.99242500  | 4.79324300  |
| H             | 1.23903000  | 1.43814500  | 5.10723200  |
| H             | 2.97539200  | 1.63117800  | 5.39254700  |
| C             | 1.67721600  | -0.83670000 | 3.54248700  |
| C             | 1.93713000  | -1.43110800 | 4.92937000  |
| H             | 1.55944600  | -1.67443900 | 2.83558000  |
| H             | 0.71430800  | -0.31518200 | 3.56179800  |
| H             | 1.09307600  | -2.06947300 | 5.20698500  |
| H             | 2.83857400  | -2.05023800 | 4.93192100  |
| H             | 2.04968200  | -0.65852100 | 5.69351100  |
| C             | 4.05003200  | -0.33533400 | 3.05015900  |
| C             | 4.85852300  | 0.03096000  | 4.29882000  |
| H             | 4.56956700  | 0.08213900  | 2.17603700  |
| H             | 4.05762600  | -1.42414700 | 2.91843300  |
| H             | 5.86578900  | -0.38710300 | 4.21419600  |
| H             | 4.96090500  | 1.11534600  | 4.39848200  |
| H             | 4.40463700  | -0.35560300 | 5.21395200  |
| H             | 1.90430800  | 0.95456000  | 0.56843200  |
| <b>re-TS2</b> |             |             |             |
| C             | -0.20742900 | 1.06259900  | 0.31899200  |
| C             | -1.40342500 | 2.32384300  | 1.67844300  |
| C             | -2.55779900 | 1.88565800  | -0.42819700 |
| H             | -2.26117300 | 1.67178100  | -1.45129100 |
| N             | -0.32109800 | 2.07770300  | 2.34170100  |
| N             | 0.41226400  | 1.28848900  | 1.49442600  |
| N             | -1.38285400 | 1.73630600  | 0.43416300  |
| C             | -2.54824400 | 3.23036600  | 1.99302300  |
| H             | -2.28373400 | 3.88970000  | 2.81892000  |
| H             | -3.44612400 | 2.65960300  | 2.26273800  |
| C             | -3.16474200 | 3.32961800  | -0.31925400 |
| O             | -2.74949200 | 4.03049400  | 0.84163100  |

|   |             |             |             |
|---|-------------|-------------|-------------|
| C | -4.89849600 | 1.67012700  | 0.03002400  |
| C | -3.68528800 | 0.98214500  | 0.01404000  |
| C | -3.59842400 | -0.34853100 | 0.38229900  |
| C | -4.78515600 | -0.97962400 | 0.73295800  |
| C | -6.01704000 | -0.33227900 | 0.73985400  |
| C | -6.07330800 | 1.01324800  | 0.38938400  |
| C | -4.69546900 | 3.11079600  | -0.36059000 |
| H | -2.65843900 | -0.88514300 | 0.41912200  |
| H | -6.90512200 | -0.88078100 | 1.02767300  |
| H | -7.02109600 | 1.54019700  | 0.40835600  |
| H | -5.19711000 | 3.81387200  | 0.30972900  |
| H | -5.07701800 | 3.29032200  | -1.37106800 |
| C | 1.65186900  | 0.72250000  | 1.94057800  |
| C | 1.61185600  | -0.54989000 | 2.51753300  |
| C | 2.83189700  | 1.45129600  | 1.77406100  |
| C | 2.83048200  | -1.13582000 | 2.86135500  |
| C | 4.02206200  | 0.83185800  | 2.15300700  |
| C | 4.04225700  | -0.46159700 | 2.67968900  |
| H | 2.83217400  | -2.13381200 | 3.29344600  |
| H | 4.95824000  | 1.36636700  | 2.01429600  |
| C | 2.81868100  | 2.82305100  | 1.15980300  |
| H | 2.08081000  | 3.46540500  | 1.64853500  |
| H | 2.55969600  | 2.76509800  | 0.09664500  |
| H | 3.80087500  | 3.28921300  | 1.24759800  |
| C | 5.34246000  | -1.10371800 | 3.08535200  |
| H | 5.28285900  | -2.19211900 | 3.01931500  |
| H | 5.58576200  | -0.84687000 | 4.12119600  |
| H | 6.16660400  | -0.75833300 | 2.45726700  |
| C | 0.29768500  | -1.23940500 | 2.77434000  |
| H | -0.26910300 | -0.70598200 | 3.54349200  |
| H | 0.45537700  | -2.26528100 | 3.11326900  |
| H | -0.32641500 | -1.26676800 | 1.87407400  |
| H | -2.82330300 | 3.94635100  | -1.15072500 |
| N | -4.72783100 | -2.39410200 | 1.11691300  |
| O | -5.76533500 | -2.94422300 | 1.43283900  |
| O | -3.63698900 | -2.94398300 | 1.09531000  |
| C | 3.89098900  | 0.38840200  | -1.38920900 |
| C | 3.46750700  | 1.38869500  | -2.29674400 |
| C | 4.43466500  | 2.07308400  | -3.05321400 |
| C | 5.76896000  | 1.75688500  | -2.87248000 |
| C | 6.16803200  | 0.76854800  | -1.94814200 |
| C | 5.24012200  | 0.07266500  | -1.19339600 |
| C | 1.65076000  | 0.55318200  | -1.23665000 |
| C | 2.04031800  | 1.47696000  | -2.17689600 |

|               |             |             |             |
|---------------|-------------|-------------|-------------|
| H             | 4.13648300  | 2.84204600  | -3.75914000 |
| H             | 6.52747600  | 2.27986300  | -3.44549100 |
| H             | 7.22410000  | 0.55132800  | -1.82621000 |
| H             | 5.54055400  | -0.68770100 | -0.47916800 |
| N             | 2.76639900  | -0.13671900 | -0.79897000 |
| H             | 2.77711200  | -0.74539600 | 0.00942200  |
| H             | 1.39275800  | 2.16169800  | -2.70943900 |
| C             | 0.27246600  | 0.20294100  | -0.76747100 |
| H             | -0.35297800 | 0.71961600  | -2.56545300 |
| O             | -0.67955000 | 0.17963800  | -1.83255900 |
| N             | 0.34910300  | -2.47497100 | -0.99539600 |
| C             | 1.38453300  | -3.09473200 | -0.12613900 |
| C             | 1.21494700  | -4.56587900 | 0.22828200  |
| H             | 1.39929900  | -2.50930200 | 0.80005500  |
| H             | 2.34626100  | -2.93179200 | -0.62207400 |
| H             | 2.04690800  | -4.85829600 | 0.87361600  |
| H             | 0.29008500  | -4.74175200 | 0.78271100  |
| H             | 1.22684500  | -5.21163300 | -0.65135200 |
| C             | -1.05925500 | -2.83422400 | -0.67904300 |
| C             | -1.63284900 | -4.09545900 | -1.31236500 |
| H             | -1.65067900 | -1.97634400 | -1.01591300 |
| H             | -1.13942800 | -2.88606300 | 0.41158100  |
| H             | -2.65595100 | -4.20908500 | -0.94584400 |
| H             | -1.67517900 | -4.01229600 | -2.40080500 |
| H             | -1.07710800 | -4.99582900 | -1.04847600 |
| C             | 0.67610600  | -2.49577900 | -2.45006400 |
| C             | 1.17559600  | -3.82154700 | -3.01258200 |
| H             | 1.44252300  | -1.72813300 | -2.60281000 |
| H             | -0.22175100 | -2.15750700 | -2.97210200 |
| H             | 1.36121300  | -3.68920700 | -4.08120500 |
| H             | 2.11926400  | -4.12687400 | -2.55430400 |
| H             | 0.45243300  | -4.62987800 | -2.89424300 |
| H             | 0.35542000  | -1.24877400 | -0.66226400 |
| <b>si-TS2</b> |             |             |             |
| C             | -4.63344100 | -6.32694800 | 0.80438200  |
| C             | -5.82861500 | -7.86547300 | 1.83842800  |
| C             | -6.29556200 | -5.58030400 | 2.63614800  |
| H             | -5.68298900 | -4.70113000 | 2.82178800  |
| N             | -5.21908900 | -8.51301800 | 0.90145300  |
| N             | -4.49521100 | -7.54571400 | 0.24111600  |
| N             | -5.50940000 | -6.52842700 | 1.83387300  |
| C             | -6.74172500 | -8.35787400 | 2.91257000  |
| H             | -6.55150400 | -9.41127700 | 3.11517700  |
| H             | -7.79231000 | -8.23847100 | 2.61353000  |

|   |              |             |             |
|---|--------------|-------------|-------------|
| C | -6.76850300  | -6.24414500 | 3.98406000  |
| O | -6.43619000  | -7.61739000 | 4.07784400  |
| C | -8.69456700  | -5.48937400 | 2.70182800  |
| C | -7.57574000  | -5.23362900 | 1.91127100  |
| C | -7.69033400  | -4.77113200 | 0.60872000  |
| C | -8.97770400  | -4.58532900 | 0.12620800  |
| C | -10.12011400 | -4.82542600 | 0.88678800  |
| C | -9.97615300  | -5.27967400 | 2.19270500  |
| C | -8.29437200  | -5.98632000 | 4.06521500  |
| H | -6.82480900  | -4.55091600 | -0.00651000 |
| H | -11.09635600 | -4.66196500 | 0.44820700  |
| H | -10.85344100 | -5.47872800 | 2.79849100  |
| H | -8.82010900  | -6.89991700 | 4.35867800  |
| H | -8.51220000  | -5.23351900 | 4.82835000  |
| C | -3.88087200  | -7.85800800 | -1.01601200 |
| C | -4.49310200  | -7.37787700 | -2.17879900 |
| C | -2.70023800  | -8.60298200 | -1.02311900 |
| C | -3.83224400  | -7.60735300 | -3.38370600 |
| C | -2.08697200  | -8.81859000 | -2.25661200 |
| C | -2.62550800  | -8.30849600 | -3.43998100 |
| H | -4.27293700  | -7.23042600 | -4.30315100 |
| H | -1.16272600  | -9.38980900 | -2.29164700 |
| C | -2.08456100  | -9.10212900 | 0.25838900  |
| H | -2.82278800  | -9.59800100 | 0.89305300  |
| H | -1.65984600  | -8.27424500 | 0.84095900  |
| H | -1.27541100  | -9.80240700 | 0.04796100  |
| C | -1.91144100  | -8.48537900 | -4.75276800 |
| H | -1.36719400  | -7.56808200 | -5.00249300 |
| H | -2.61729600  | -8.68331100 | -5.56272000 |
| H | -1.19201600  | -9.30530900 | -4.70806400 |
| C | -5.80564900  | -6.63928400 | -2.13105100 |
| H | -6.49857100  | -7.09901400 | -1.41896200 |
| H | -6.27678100  | -6.63887100 | -3.11507900 |
| H | -5.65701100  | -5.59462400 | -1.83838800 |
| H | -6.24321800  | -5.78162100 | 4.81942600  |
| N | -9.13524900  | -4.12432100 | -1.25901300 |
| O | -10.26366900 | -3.91126100 | -1.66391400 |
| O | -8.12580500  | -3.98469700 | -1.92894900 |
| C | -1.61791300  | -5.08195700 | -2.32806800 |
| C | -2.53151100  | -4.08074100 | -2.73602800 |
| C | -2.33998500  | -3.45404600 | -3.97926700 |
| C | -1.27237500  | -3.84487000 | -4.76848400 |
| C | -0.38051900  | -4.85135300 | -4.34351800 |
| C | -0.53873100  | -5.48425300 | -3.12124200 |

|                           |             |             |             |
|---------------------------|-------------|-------------|-------------|
| C                         | -3.19051700 | -4.88744900 | -0.72940300 |
| C                         | -3.51525700 | -3.96962900 | -1.69839000 |
| H                         | -3.02595400 | -2.68303600 | -4.31609800 |
| H                         | -1.11610100 | -3.37334700 | -5.73304700 |
| H                         | 0.44489800  | -5.13713100 | -4.98762300 |
| H                         | 0.14013000  | -6.26598300 | -2.79407300 |
| N                         | -2.01267600 | -5.51871600 | -1.08492900 |
| H                         | -1.62206000 | -6.32475900 | -0.62103200 |
| H                         | -4.37419000 | -3.31404000 | -1.67463200 |
| C                         | -3.88157500 | -5.11135100 | 0.56737200  |
| H                         | -4.15500200 | -3.21355500 | 0.90340100  |
| O                         | -4.71490900 | -4.00109100 | 0.89597000  |
| N                         | -2.14051700 | -5.15900800 | 2.68010600  |
| C                         | -2.54536200 | -3.91803000 | 3.39543100  |
| C                         | -2.17832800 | -3.82124200 | 4.87069200  |
| H                         | -3.63356300 | -3.84886000 | 3.29520600  |
| H                         | -2.12006600 | -3.08247900 | 2.83033300  |
| H                         | -2.52445700 | -2.85567000 | 5.24650300  |
| H                         | -2.67447300 | -4.59822700 | 5.45686100  |
| H                         | -1.10361000 | -3.88504700 | 5.04387800  |
| C                         | -2.48449600 | -6.42757700 | 3.37767900  |
| C                         | -1.43456600 | -7.00940400 | 4.31477500  |
| H                         | -2.70204000 | -7.16282400 | 2.59184900  |
| H                         | -3.42467900 | -6.25123600 | 3.91174400  |
| H                         | -1.83476600 | -7.92880300 | 4.74789900  |
| H                         | -0.51957900 | -7.26963700 | 3.77740200  |
| H                         | -1.18147000 | -6.33202400 | 5.13168100  |
| C                         | -0.78408800 | -5.11457700 | 2.06784800  |
| C                         | 0.35889700  | -4.60925400 | 2.93852300  |
| H                         | -0.87286800 | -4.47251400 | 1.18501600  |
| H                         | -0.57315100 | -6.12724600 | 1.70695400  |
| H                         | 1.27984400  | -4.66186500 | 2.35332800  |
| H                         | 0.21155900  | -3.56454900 | 3.22146600  |
| H                         | 0.49846200  | -5.20340200 | 3.84252200  |
| H                         | -2.90409700 | -5.18866700 | 1.66417000  |
| <b>re-TS2<sup>D</sup></b> |             |             |             |
| C                         | 0.03062000  | 0.26728600  | -0.43585600 |
| C                         | 1.20431000  | 0.07042500  | -2.29239300 |
| C                         | 2.24382300  | 1.57461600  | -0.62824600 |
| H                         | 1.81355300  | 2.23622800  | 0.12044800  |
| N                         | 0.15225900  | -0.65303800 | -2.50773600 |
| N                         | -0.57109400 | -0.53212900 | -1.34545900 |
| N                         | 1.17664200  | 0.66347300  | -1.05515500 |
| C                         | 2.30097800  | 0.47929300  | -3.21639600 |



|   |             |             |             |
|---|-------------|-------------|-------------|
| H | 2.04861600  | 0.22097800  | -4.24415600 |
| H | 3.25127300  | -0.00205300 | -2.94616700 |
| C | 2.82979400  | 2.36500500  | -1.86130000 |
| O | 2.37981600  | 1.89089800  | -3.12077600 |
| C | 4.61558400  | 1.19351400  | -0.69894700 |
| C | 3.42878100  | 0.81815000  | -0.07241500 |
| C | 3.41044500  | -0.13139300 | 0.93818900  |
| C | 4.62770500  | -0.70786800 | 1.27479000  |
| C | 5.83142200  | -0.36364500 | 0.66307600  |
| C | 5.82530900  | 0.60412900  | -0.33353300 |
| C | 4.36895400  | 2.26549800  | -1.72527300 |
| H | 2.49700100  | -0.38890900 | 1.45948100  |
| H | 6.74587500  | -0.85304700 | 0.97365300  |
| H | 6.75161500  | 0.88998700  | -0.82057100 |
| H | 4.81904500  | 2.04192900  | -2.69735700 |
| H | 4.78659200  | 3.21896900  | -1.38719800 |
| C | -1.75061500 | -1.31284300 | -1.13199500 |
| C | -1.61170500 | -2.52896500 | -0.45450900 |
| C | -2.98413400 | -0.80282500 | -1.53915200 |
| C | -2.77671800 | -3.23892800 | -0.16529900 |
| C | -4.11937200 | -1.55666400 | -1.24328400 |
| C | -4.03546400 | -2.76720800 | -0.55307500 |
| H | -2.70052200 | -4.18063900 | 0.37267500  |
| H | -5.09449100 | -1.17264800 | -1.53211900 |
| C | -3.08437400 | 0.55600100  | -2.17390800 |
| H | -2.34160600 | 0.68465600  | -2.96540800 |
| H | -2.90515200 | 1.32962400  | -1.41650500 |
| H | -4.07867800 | 0.71250300  | -2.59467000 |
| C | -5.27657900 | -3.56351600 | -0.24470200 |
| H | -5.18600700 | -4.07843500 | 0.71460800  |
| H | -5.44469500 | -4.32469200 | -1.01322400 |
| H | -6.15942500 | -2.92115100 | -0.21408900 |
| C | -0.25327300 | -3.01122500 | -0.02064200 |
| H | 0.44047200  | -3.04003900 | -0.86611800 |
| H | -0.31689600 | -4.00985500 | 0.41323500  |
| H | 0.16766400  | -2.33320200 | 0.73067200  |
| H | 2.49171900  | 3.40035400  | -1.82582000 |
| N | 4.64667100  | -1.72834800 | 2.32906500  |
| O | 5.72494100  | -2.19718600 | 2.65145100  |
| O | 3.58228300  | -2.05613800 | 2.82421200  |
| C | -3.98531800 | 0.71367600  | 1.52455800  |
| C | -3.69709000 | 2.10240200  | 1.46974200  |
| C | -4.75597800 | 3.01531400  | 1.61771100  |
| C | -6.04136200 | 2.53312700  | 1.79645000  |

|   |             |             |            |
|---|-------------|-------------|------------|
| C | -6.30406900 | 1.14785800  | 1.83154100 |
| C | -5.28385100 | 0.22118700  | 1.69512900 |
| C | -1.77813200 | 0.94770200  | 1.15550500 |
| C | -2.28759300 | 2.22127500  | 1.23877000 |
| H | -4.56617900 | 4.08413700  | 1.58458200 |
| H | -6.86537100 | 3.23085000  | 1.90721600 |
| H | -7.32412000 | 0.80237500  | 1.96602500 |
| H | -5.47747400 | -0.84744800 | 1.71620200 |
| N | -2.79980600 | 0.04381100  | 1.36812300 |
| H | -2.70071000 | -0.95992700 | 1.29800600 |
| H | -1.70700500 | 3.12805200  | 1.15083300 |
| C | -0.36859200 | 0.54150000  | 0.91832700 |
| H | 0.25929300  | 0.01617000  | 1.77099700 |
| O | 0.63795100  | 1.26045800  | 1.69481200 |

**si-TS2<sup>D</sup>**

|   |              |             |             |
|---|--------------|-------------|-------------|
| C | -4.78465000  | -6.72457400 | 0.89617900  |
| C | -6.17393500  | -8.26666900 | 1.63291800  |
| C | -6.34846600  | -6.04543900 | 2.79155100  |
| H | -5.53446800  | -5.52763600 | 3.29608900  |
| N | -5.59111000  | -8.82455900 | 0.62115700  |
| N | -4.73697700  | -7.85601500 | 0.15231700  |
| N | -5.72522900  | -6.98595600 | 1.84835200  |
| C | -7.20222500  | -8.84455200 | 2.54928100  |
| H | -7.01532300  | -9.90908600 | 2.69324200  |
| H | -8.20408500  | -8.72733700 | 2.11708100  |
| C | -7.30175300  | -6.81487200 | 3.77367400  |
| O | -7.08917700  | -8.21412600 | 3.80712300  |
| C | -8.60190800  | -5.29560500 | 2.40911600  |
| C | -7.26481100  | -5.07697000 | 2.07826200  |
| C | -6.88488500  | -4.07525200 | 1.19286500  |
| C | -7.91260700  | -3.32614400 | 0.63286700  |
| C | -9.25980700  | -3.52619400 | 0.92940400  |
| C | -9.60772100  | -4.51841900 | 1.83598500  |
| C | -8.75255000  | -6.40496600 | 3.41265200  |
| H | -5.83082500  | -3.86977800 | 1.00400600  |
| H | -10.00789600 | -2.90243000 | 0.45681400  |
| H | -10.64938000 | -4.68175100 | 2.09154600  |
| H | -9.31838400  | -7.24563200 | 2.99864500  |
| H | -9.29572600  | -6.07419000 | 4.30151300  |
| C | -3.80374300  | -8.12979600 | -0.89817200 |
| C | -4.18636500  | -7.90288500 | -2.22382800 |
| C | -2.52028400  | -8.54559200 | -0.53835700 |
| C | -3.21342700  | -8.06733800 | -3.20658300 |
| C | -1.58344900  | -8.70796800 | -1.56002000 |

|                           |             |             |             |
|---------------------------|-------------|-------------|-------------|
| C                         | -1.91004300 | -8.45999100 | -2.89368000 |
| H                         | -3.47188400 | -7.85749300 | -4.24225200 |
| H                         | -0.57438100 | -9.02214900 | -1.30426200 |
| C                         | -2.16148000 | -8.75845100 | 0.90842400  |
| H                         | -2.87623800 | -9.42616700 | 1.39862500  |
| H                         | -2.17916800 | -7.80532800 | 1.44995400  |
| H                         | -1.16328300 | -9.18899500 | 1.00115800  |
| C                         | -0.88413000 | -8.60209000 | -3.98742900 |
| H                         | -1.12358700 | -9.44740000 | -4.63984700 |
| H                         | 0.11501700  | -8.76248600 | -3.57698600 |
| H                         | -0.86448800 | -7.70060400 | -4.60685700 |
| C                         | -5.59321000 | -7.50036600 | -2.57185400 |
| H                         | -6.25210400 | -8.37497200 | -2.57889000 |
| H                         | -5.62223000 | -7.03761200 | -3.56032700 |
| H                         | -5.99165600 | -6.78619900 | -1.84747400 |
| H                         | -7.06586700 | -6.48143600 | 4.78464200  |
| N                         | -7.56690100 | -2.25722800 | -0.31234500 |
| O                         | -8.47742400 | -1.61283200 | -0.80596800 |
| O                         | -6.38769900 | -2.07009000 | -0.55748300 |
| C                         | -2.26861500 | -4.94986500 | -2.40257400 |
| C                         | -3.54988300 | -4.43728200 | -2.72930000 |
| C                         | -3.78325800 | -3.98640000 | -4.04051100 |
| C                         | -2.76171500 | -4.06495700 | -4.97089100 |
| C                         | -1.49518400 | -4.57993700 | -4.62157700 |
| C                         | -1.22976300 | -5.02424200 | -3.33750000 |
| C                         | -3.57691700 | -5.14308900 | -0.58227700 |
| C                         | -4.35735300 | -4.56373300 | -1.55208300 |
| H                         | -4.75535900 | -3.58897800 | -4.31774500 |
| H                         | -2.93225800 | -3.72474600 | -5.98734300 |
| H                         | -0.71456600 | -4.62997000 | -5.37448500 |
| H                         | -0.25917100 | -5.42812700 | -3.06496800 |
| N                         | -2.30751200 | -5.33969000 | -1.09011900 |
| H                         | -1.58444100 | -5.85495600 | -0.61085300 |
| H                         | -5.38987600 | -4.26646900 | -1.43185100 |
| C                         | -3.93151800 | -5.57989100 | 0.79196800  |
| H                         | -3.15488900 | -5.46315800 | 1.67914000  |
| O                         | -4.08436300 | -4.56175100 | 1.82563500  |
| <b>re-TS2<sup>N</sup></b> |             |             |             |
| C                         | -3.71447900 | -0.92571500 | 0.51250200  |
| C                         | -5.07066300 | -1.16523800 | 0.30655200  |
| C                         | -6.01618700 | -0.70351800 | 1.22305500  |
| C                         | -5.58416800 | -0.00505700 | 2.34301000  |
| C                         | -4.21627700 | 0.20188400  | 2.52347600  |
| C                         | -3.25146600 | -0.25013900 | 1.63267200  |

|   |             |             |             |
|---|-------------|-------------|-------------|
| C | -2.86859700 | -1.50507400 | -0.59758000 |
| C | -3.91662700 | -2.01067200 | -1.66133100 |
| C | -5.29296400 | -1.96078000 | -0.95128100 |
| H | -7.07494400 | -0.88327600 | 1.06857500  |
| H | -6.28231900 | 0.37519000  | 3.07787600  |
| H | -2.18166600 | -0.14067600 | 1.78939500  |
| H | -3.66388100 | -3.02584300 | -1.96746200 |
| H | -6.04210000 | -1.51666700 | -1.61425900 |
| H | -2.22664800 | -2.29657400 | -0.21506900 |
| H | -5.63752600 | -2.97073100 | -0.70768200 |
| C | -2.40283300 | 0.33215300  | -2.17188300 |
| C | -0.64033500 | -0.26124300 | -0.95681700 |
| N | -1.45207700 | 1.08010700  | -2.62766200 |
| N | -1.97458700 | -0.49760700 | -1.17334200 |
| N | -0.35593700 | 0.71881600  | -1.86649200 |
| C | -3.78480800 | 0.12769100  | -2.69166000 |
| H | -4.53747400 | 0.52599800  | -1.99698900 |
| H | -3.90133200 | 0.61036600  | -3.66142500 |
| O | -3.92685000 | -1.27048500 | -2.87327000 |
| C | 0.76975400  | 1.59890100  | -1.91007100 |
| C | 0.78279400  | 2.67949200  | -1.01895800 |
| C | 1.73166400  | 1.44303600  | -2.91394900 |
| C | 1.85712000  | 3.56319800  | -1.08366800 |
| C | 2.80003400  | 2.34246600  | -2.92756100 |
| C | 2.88566000  | 3.39519500  | -2.01505700 |
| H | 1.89086900  | 4.40552600  | -0.39609500 |
| H | 3.57233900  | 2.22631600  | -3.68387800 |
| C | -0.37348500 | 2.89040700  | -0.07886400 |
| H | -1.28206600 | 3.12077000  | -0.64518700 |
| H | -0.57821500 | 1.98662100  | 0.50540200  |
| H | -0.17718600 | 3.71634000  | 0.60767300  |
| C | 4.06818000  | 4.32755100  | -2.02319200 |
| H | 4.84383700  | 3.96501100  | -1.34007600 |
| H | 4.51114300  | 4.39898900  | -3.01872400 |
| H | 3.78261400  | 5.32971400  | -1.69575100 |
| C | 1.59307900  | 0.37426900  | -3.96693400 |
| H | 2.55160100  | 0.18629700  | -4.45467000 |
| H | 1.22267200  | -0.56337800 | -3.54616600 |
| H | 0.87767500  | 0.69622400  | -4.73039400 |
| C | 0.13372500  | -0.90024000 | 0.10182800  |
| O | -0.64154300 | -1.57303100 | 0.98613500  |
| H | 0.90259700  | -0.01018200 | 1.03398400  |
| N | 1.45495100  | 0.33942000  | 2.13660700  |
| C | 0.29766700  | 0.61332900  | 3.03104700  |

|                           |             |             |             |
|---------------------------|-------------|-------------|-------------|
| C                         | 0.65609300  | 1.07615700  | 4.43741400  |
| H                         | -0.29895100 | -0.29832600 | 3.03715600  |
| H                         | -0.30628100 | 1.37745400  | 2.53128600  |
| H                         | -0.26428400 | 1.13663400  | 5.02208600  |
| H                         | 1.32943100  | 0.37415600  | 4.93801400  |
| H                         | 1.12190400  | 2.06452900  | 4.44607800  |
| C                         | 2.32043800  | -0.78633000 | 2.60371200  |
| C                         | 1.55740900  | -1.97163900 | 3.17367400  |
| H                         | 3.02966700  | -0.38432500 | 3.34062500  |
| H                         | 2.89358500  | -1.11087800 | 1.73141500  |
| H                         | 2.24753700  | -2.81506300 | 3.25866500  |
| H                         | 1.16063600  | -1.75926500 | 4.17073200  |
| H                         | 0.73497400  | -2.23308900 | 2.50103100  |
| C                         | 2.27038700  | 1.56220600  | 1.93050700  |
| C                         | 3.39498100  | 1.39335600  | 0.92135800  |
| H                         | 2.68676000  | 1.86685700  | 2.89770800  |
| H                         | 1.58675200  | 2.35098000  | 1.60256200  |
| H                         | 3.88385300  | 2.36019200  | 0.77708800  |
| H                         | 4.14887800  | 0.67935700  | 1.25853100  |
| H                         | 3.01076900  | 1.06873600  | -0.04764900 |
| N                         | -3.77872900 | 0.92409000  | 3.72220100  |
| O                         | -4.63268600 | 1.34759300  | 4.48267900  |
| O                         | -2.57960400 | 1.06808800  | 3.89901400  |
| C                         | 3.28946800  | -2.14472700 | -1.38513700 |
| C                         | 2.86593100  | -3.30739300 | -0.68822500 |
| C                         | 3.69309400  | -4.44178900 | -0.72700500 |
| C                         | 4.88698100  | -4.39003700 | -1.43422800 |
| C                         | 5.28188400  | -3.22458300 | -2.11451500 |
| C                         | 4.48481600  | -2.08588600 | -2.10033400 |
| C                         | 1.29885300  | -1.68833100 | -0.40758500 |
| C                         | 1.60601800  | -2.99099000 | -0.08097400 |
| H                         | 3.40093300  | -5.34974500 | -0.20695100 |
| H                         | 5.52935700  | -5.26488300 | -1.46416000 |
| H                         | 6.22051200  | -3.21335700 | -2.65934900 |
| H                         | 4.77928600  | -1.18107500 | -2.62478500 |
| N                         | 2.31862000  | -1.18534000 | -1.19951000 |
| H                         | 2.38543000  | -0.23323600 | -1.52137800 |
| H                         | 0.98603600  | -3.61956400 | 0.53850300  |
| <b>si-TS2<sup>N</sup></b> |             |             |             |
| C                         | -4.57044000 | -6.36525900 | 0.76466100  |
| C                         | -5.52297200 | -7.97713800 | 1.95936600  |
| C                         | -6.16424000 | -5.69275700 | 2.67031700  |
| H                         | -5.57738500 | -4.78332300 | 2.78266100  |
| N                         | -4.89585100 | -8.62108800 | 1.03366900  |

|   |              |              |             |
|---|--------------|--------------|-------------|
| N | -4.32214700  | -7.61595300  | 0.26198500  |
| N | -5.37382200  | -6.62000500  | 1.85812900  |
| C | -6.30287200  | -8.50557800  | 3.11609200  |
| H | -5.97149500  | -9.51250600  | 3.36922500  |
| H | -7.37505900  | -8.53585900  | 2.87559700  |
| C | -6.54824100  | -6.34654600  | 4.05073900  |
| O | -6.04206800  | -7.66093900  | 4.22061400  |
| C | -8.56431200  | -5.77661000  | 2.80719100  |
| C | -7.48865400  | -5.40848700  | 2.00406100  |
| C | -7.65751100  | -4.87911600  | 0.73168700  |
| C | -8.96695000  | -4.77106600  | 0.28527900  |
| C | -10.07310800 | -5.13550100  | 1.05409900  |
| C | -9.87000800  | -5.63634700  | 2.33416700  |
| C | -8.09673900  | -6.28385800  | 4.14584200  |
| H | -6.78395500  | -4.53819500  | 0.17297900  |
| H | -11.06780400 | -5.02282600  | 0.64168700  |
| H | -10.71901700 | -5.91953600  | 2.94740200  |
| H | -8.50711100  | -7.26811600  | 4.39433500  |
| H | -8.40410400  | -5.60446900  | 4.94627200  |
| C | -3.91306500  | -7.92244200  | -1.07009100 |
| C | -4.58879600  | -7.32964300  | -2.14451200 |
| C | -2.80058500  | -8.75550200  | -1.25013100 |
| C | -4.05844200  | -7.52323700  | -3.42028900 |
| C | -2.32050500  | -8.92774300  | -2.54678900 |
| C | -2.91471500  | -8.29052400  | -3.63854000 |
| H | -4.55265000  | -7.05192100  | -4.26644400 |
| H | -1.44563600  | -9.55427000  | -2.70490700 |
| C | -2.10439500  | -9.38670400  | -0.07171500 |
| H | -2.77639600  | -10.04977600 | 0.47850300  |
| H | -1.76363700  | -8.62540400  | 0.64078000  |
| H | -1.23435200  | -9.95653400  | -0.40146900 |
| C | -2.30819100  | -8.39710200  | -5.01239300 |
| H | -1.56342600  | -7.60498400  | -5.15089100 |
| H | -3.06469800  | -8.28074700  | -5.79151000 |
| H | -1.80590700  | -9.35696100  | -5.15340800 |
| C | -5.82624200  | -6.48933100  | -1.95472600 |
| H | -6.45219700  | -6.87211200  | -1.14210400 |
| H | -6.41959700  | -6.48493300  | -2.87125100 |
| H | -5.56977400  | -5.45069500  | -1.71668500 |
| H | -6.08530400  | -5.77615500  | 4.85700600  |
| N | -9.20071300  | -4.25212200  | -1.06738000 |
| O | -10.35474300 | -4.07095300  | -1.42082000 |
| O | -8.22990200  | -4.03542600  | -1.77166100 |
| C | -1.48532900  | -5.08319600  | -2.20518200 |

|              |             |             |             |
|--------------|-------------|-------------|-------------|
| C            | -2.11746200 | -3.83793000 | -2.45453100 |
| C            | -1.64905200 | -3.04876400 | -3.51757100 |
| C            | -0.60217800 | -3.51595600 | -4.29735200 |
| C            | -0.00309600 | -4.76435400 | -4.04049800 |
| C            | -0.43588400 | -5.56442600 | -2.99172000 |
| C            | -3.17120900 | -4.84951900 | -0.71968300 |
| C            | -3.17103500 | -3.71133900 | -1.49084000 |
| H            | -2.11119000 | -2.08910500 | -3.73047000 |
| H            | -0.23958400 | -2.91451300 | -5.12515800 |
| H            | 0.80982000  | -5.10702200 | -4.67305200 |
| H            | 0.01313300  | -6.53352600 | -2.79303200 |
| N            | -2.11232200 | -5.65075500 | -1.12117800 |
| H            | -1.94707000 | -6.59727000 | -0.81826300 |
| H            | -3.86716800 | -2.89874500 | -1.35476500 |
| C            | -4.04680800 | -5.05533100 | 0.47256600  |
| H            | -3.06731700 | -5.07133000 | 1.48187900  |
| O            | -4.84154700 | -4.01600900 | 0.77355200  |
| N            | -2.17572600 | -4.80498100 | 2.49171200  |
| C            | -2.22518800 | -3.37351100 | 2.88640700  |
| C            | -3.57095100 | -2.91686300 | 3.42557200  |
| H            | -1.99971300 | -2.79286100 | 1.99067400  |
| H            | -1.42167800 | -3.19654900 | 3.61811800  |
| H            | -3.52153300 | -1.83929600 | 3.60139400  |
| H            | -4.32981400 | -3.11673800 | 2.66109500  |
| H            | -3.83270200 | -3.39097400 | 4.37518300  |
| C            | -2.59189500 | -5.68002300 | 3.61442300  |
| C            | -2.42708600 | -7.16994700 | 3.34398400  |
| H            | -3.64537100 | -5.46623600 | 3.81156900  |
| H            | -2.02480300 | -5.39221500 | 4.51213300  |
| H            | -2.96344400 | -7.72685100 | 4.11595700  |
| H            | -2.85128600 | -7.45479100 | 2.37694200  |
| H            | -1.38054600 | -7.48198500 | 3.36397400  |
| C            | -0.82295100 | -5.17510400 | 2.00214800  |
| C            | -0.21342300 | -4.17776000 | 1.02400600  |
| H            | -0.92029400 | -6.15069300 | 1.51671000  |
| H            | -0.16053500 | -5.30375400 | 2.87116700  |
| H            | 0.63311700  | -4.65298900 | 0.52276900  |
| H            | -0.93142100 | -3.87551200 | 0.25653700  |
| H            | 0.15656600  | -3.28535300 | 1.53275300  |
| <b>re-M2</b> |             |             |             |
| C            | 0.03006900  | 1.07609500  | -0.82128200 |
| C            | 1.19394800  | 0.50874900  | -2.63931800 |
| C            | 2.51118100  | 1.77080400  | -0.97330700 |
| H            | 2.29284900  | 2.64482000  | -0.36131700 |

|   |             |             |             |
|---|-------------|-------------|-------------|
| N | 0.06057000  | -0.06291300 | -2.83227800 |
| N | -0.71523700 | 0.30455200  | -1.72362000 |
| N | 1.24871600  | 1.25289200  | -1.48160900 |
| C | 2.40681500  | 0.52079000  | -3.50802400 |
| H | 2.13901800  | 0.31638500  | -4.54441600 |
| H | 3.12819000  | -0.23963000 | -3.17316900 |
| C | 3.47596100  | 2.15031300  | -2.16289000 |
| O | 2.96311800  | 1.82112700  | -3.44158800 |
| C | 4.54716000  | 0.50958500  | -0.71865000 |
| C | 3.27381300  | 0.72241800  | -0.19186800 |
| C | 2.81003300  | -0.00952500 | 0.89321000  |
| C | 3.66045100  | -0.98289900 | 1.40141800  |
| C | 4.93623700  | -1.22482700 | 0.89548300  |
| C | 5.38691100  | -0.46192100 | -0.17472100 |
| C | 4.82241500  | 1.44133600  | -1.86732200 |
| H | 1.83839600  | 0.17190100  | 1.33765900  |
| H | 5.54986200  | -1.99826300 | 1.33983900  |
| H | 6.37721300  | -0.63087500 | -0.58450700 |
| H | 5.18419700  | 0.92171800  | -2.76030800 |
| H | 5.58895900  | 2.17228700  | -1.59204600 |
| C | -1.73641100 | -0.60695200 | -1.29970200 |
| C | -1.38194500 | -1.75007600 | -0.57458100 |
| C | -3.07285500 | -0.30276000 | -1.58780600 |
| C | -2.40500300 | -2.58124900 | -0.11197400 |
| C | -4.06109400 | -1.15024100 | -1.09421400 |
| C | -3.74718500 | -2.28931200 | -0.34897700 |
| H | -2.14301000 | -3.47152000 | 0.45572900  |
| H | -5.10514500 | -0.90969400 | -1.28436000 |
| C | -3.42373700 | 0.90203200  | -2.41723100 |
| H | -3.19735200 | 0.72103800  | -3.47332700 |
| H | -2.84418100 | 1.77195400  | -2.10289100 |
| H | -4.48718200 | 1.13454300  | -2.32774800 |
| C | -4.84612100 | -3.16332700 | 0.19664700  |
| H | -4.44159000 | -4.04712100 | 0.69472400  |
| H | -5.51845400 | -3.49536500 | -0.59978100 |
| H | -5.44585500 | -2.60449200 | 0.92230900  |
| C | 0.05634300  | -2.05190500 | -0.24019800 |
| H | 0.72618200  | -1.80407000 | -1.06828100 |
| H | 0.18150800  | -3.10935900 | 0.00244700  |
| H | 0.38445200  | -1.47115700 | 0.63019800  |
| H | 3.60177800  | 3.23251800  | -2.19356800 |
| N | 3.18428100  | -1.79957000 | 2.52273800  |
| O | 3.95750600  | -2.60333700 | 3.01469500  |
| O | 2.03597200  | -1.63653400 | 2.90131300  |



|   |             |             |            |
|---|-------------|-------------|------------|
| C | -3.51931000 | 0.49093700  | 1.88704400 |
| C | -3.96148600 | 1.66740800  | 1.22961700 |
| C | -5.32921100 | 1.99092400  | 1.26378300 |
| C | -6.20231100 | 1.14965500  | 1.93052400 |
| C | -5.73891300 | -0.01551100 | 2.57792900 |
| C | -4.39804400 | -0.35911100 | 2.56922200 |
| C | -1.73768800 | 1.42875600  | 0.87865000 |
| C | -2.80747100 | 2.24821100  | 0.61106400 |
| H | -5.69322400 | 2.88490000  | 0.76553800 |
| H | -7.26140200 | 1.38505800  | 1.95867100 |
| H | -6.44924400 | -0.65686900 | 3.09062800 |
| H | -4.03991500 | -1.26042500 | 3.05751900 |
| N | -2.16870600 | 0.39109500  | 1.68873700 |
| H | -1.60251300 | -0.41032200 | 1.92362500 |
| H | -2.76899500 | 3.14399400  | 0.00728100 |
| C | -0.35312800 | 1.53299600  | 0.39641200 |
| H | 0.32842200  | 3.03669900  | 1.40266000 |
| O | 0.60539300  | 2.12734900  | 1.22770000 |

**si-M2**

|   |              |             |             |
|---|--------------|-------------|-------------|
| C | -4.67884800  | -6.34488300 | 0.89009300  |
| C | -5.81406800  | -7.92115700 | 1.99678600  |
| C | -6.38743600  | -5.64222500 | 2.70697400  |
| H | -5.81533500  | -4.74078300 | 2.91204300  |
| N | -5.20440200  | -8.58664900 | 1.08353200  |
| N | -4.49448200  | -7.62293000 | 0.37121000  |
| N | -5.52670000  | -6.57491900 | 1.98466800  |
| C | -6.74980100  | -8.41837200 | 3.04857900  |
| H | -6.53316200  | -9.45919400 | 3.28891400  |
| H | -7.79078700  | -8.34821200 | 2.69899900  |
| C | -6.90336300  | -6.28133700 | 4.05139100  |
| O | -6.54284200  | -7.64176500 | 4.21165800  |
| C | -8.79355600  | -5.60594600 | 2.67353300  |
| C | -7.64754100  | -5.33449200 | 1.92711500  |
| C | -7.72774000  | -4.88551000 | 0.61521200  |
| C | -9.00176300  | -4.74169300 | 0.08070400  |
| C | -10.16684100 | -5.00351000 | 0.79849700  |
| C | -10.05995000 | -5.43667800 | 2.11453600  |
| C | -8.43899000  | -6.06931800 | 4.06097600  |
| H | -6.84734000  | -4.64921000 | 0.02829000  |
| H | -11.12956600 | -4.87033300 | 0.32152200  |
| H | -10.95423700 | -5.64992600 | 2.69062100  |
| H | -8.95016600  | -6.99469900 | 4.34453000  |
| H | -8.71638100  | -5.31191000 | 4.80068500  |
| C | -3.96058700  | -7.95206600 | -0.90184900 |

|            |              |              |             |
|------------|--------------|--------------|-------------|
| C          | -4.53480300  | -7.41542400  | -2.06241000 |
| C          | -2.81591400  | -8.76238600  | -0.94596300 |
| C          | -3.87200700  | -7.62833500  | -3.27128600 |
| C          | -2.19748100  | -8.95757300  | -2.17990300 |
| C          | -2.69212300  | -8.36858400  | -3.34646100 |
| H          | -4.28901100  | -7.19876900  | -4.17952300 |
| H          | -1.29719600  | -9.56595500  | -2.22715500 |
| C          | -2.25358900  | -9.35616400  | 0.31913800  |
| H          | -2.95581800  | -10.06911500 | 0.75959800  |
| H          | -2.08160600  | -8.58155300  | 1.07427000  |
| H          | -1.30993400  | -9.86676200  | 0.12003200  |
| C          | -1.95493100  | -8.50247300  | -4.65268100 |
| H          | -2.64816700  | -8.58224300  | -5.49355600 |
| H          | -1.30249900  | -9.37840400  | -4.65486900 |
| H          | -1.33199100  | -7.61661600  | -4.82108600 |
| C          | -5.80742400  | -6.61128700  | -2.02257200 |
| H          | -6.45997400  | -6.93496900  | -1.20585700 |
| H          | -6.35002300  | -6.71751200  | -2.96433000 |
| H          | -5.59345500  | -5.54713400  | -1.87759800 |
| H          | -6.43203800  | -5.77728300  | 4.89488900  |
| N          | -9.12315800  | -4.29857700  | -1.31284400 |
| O          | -10.24321400 | -4.13300200  | -1.76507800 |
| O          | -8.09668900  | -4.12353600  | -1.94743100 |
| C          | -1.55055200  | -5.02542800  | -2.06110500 |
| C          | -2.20091700  | -3.79087800  | -2.31547600 |
| C          | -1.72645600  | -2.98378000  | -3.36341500 |
| C          | -0.65396700  | -3.42463700  | -4.12170700 |
| C          | -0.03379000  | -4.66228200  | -3.85872600 |
| C          | -0.47324200  | -5.47899400  | -2.82673500 |
| C          | -3.26763700  | -4.84170100  | -0.61189400 |
| C          | -3.27921500  | -3.69295900  | -1.38148300 |
| H          | -2.20343800  | -2.03247000  | -3.58022300 |
| H          | -0.28539700  | -2.81038400  | -4.93723300 |
| H          | 0.80143700   | -4.98222600  | -4.47364500 |
| H          | -0.00792500  | -6.43909300  | -2.62255000 |
| N          | -2.18814400  | -5.61509400  | -0.99768300 |
| H          | -1.98908300  | -6.54444200  | -0.66135000 |
| H          | -4.00815200  | -2.90050800  | -1.29699000 |
| C          | -4.18087100  | -5.14137900  | 0.47725300  |
| H          | -4.08405100  | -3.41378200  | 1.32974000  |
| O          | -4.78630200  | -4.00879600  | 1.03393600  |
| <b>TS3</b> |              |              |             |
| C          | -4.30663600  | -5.63788500  | 0.98797500  |
| C          | -5.15532700  | -7.40119500  | 2.01514400  |

|   |              |             |             |
|---|--------------|-------------|-------------|
| C | -6.25209200  | -5.31529300 | 2.68955800  |
| H | -5.88552300  | -4.31844200 | 2.90888900  |
| N | -4.29160000  | -7.90022200 | 1.19078400  |
| N | -3.78005400  | -6.81119100 | 0.53453700  |
| N | -5.21363100  | -6.03883400 | 1.94044300  |
| C | -5.99382400  | -8.10098800 | 3.03129500  |
| H | -5.55868200  | -9.07163900 | 3.26786400  |
| H | -7.01567000  | -8.25088000 | 2.65434500  |
| C | -6.62018500  | -6.05605800 | 4.03272000  |
| O | -5.97299900  | -7.30402300 | 4.19683900  |
| C | -8.60351800  | -5.79907000 | 2.64195000  |
| C | -7.53761900  | -5.29734100 | 1.89789700  |
| C | -7.69147900  | -4.89237800 | 0.57981100  |
| C | -8.96278600  | -5.01612400 | 0.03666700  |
| C | -10.05493200 | -5.50178900 | 0.75262600  |
| C | -9.87326000  | -5.89589800 | 2.07271100  |
| C | -8.16579000  | -6.17941700 | 4.03104000  |
| H | -6.86844100  | -4.48823900 | 0.00095900  |
| H | -11.02066000 | -5.57342400 | 0.26833200  |
| H | -10.70978800 | -6.28478300 | 2.64346800  |
| H | -8.46631600  | -7.19473600 | 4.30843800  |
| H | -8.60218600  | -5.50267000 | 4.77147300  |
| C | -2.98466100  | -7.06582500 | -0.62862900 |
| C | -3.53347200  | -6.80958100 | -1.88903700 |
| C | -1.68004400  | -7.53546500 | -0.44212000 |
| C | -2.70068600  | -6.98778100 | -2.99229800 |
| C | -0.89220100  | -7.70480400 | -1.58009700 |
| C | -1.37824900  | -7.41348300 | -2.85734200 |
| H | -3.09409700  | -6.77713100 | -3.98376700 |
| H | 0.12825200   | -8.06267500 | -1.46665700 |
| C | -1.12415900  | -7.74830800 | 0.94246700  |
| H | -1.75223400  | -8.42360600 | 1.52888700  |
| H | -1.07680000  | -6.79624100 | 1.49019400  |
| H | -0.11421800  | -8.15850600 | 0.89227200  |
| C | -0.48518800  | -7.51574100 | -4.06484100 |
| H | -1.00636100  | -7.98106200 | -4.90497800 |
| H | 0.41484100   | -8.09462300 | -3.84756300 |
| H | -0.17538700  | -6.51379700 | -4.38360200 |
| C | -4.94307800  | -6.30718400 | -2.05924400 |
| H | -5.62718600  | -6.75728300 | -1.33342200 |
| H | -5.30767700  | -6.53729600 | -3.06155400 |
| H | -4.98391600  | -5.21933800 | -1.93032700 |
| H | -6.27101600  | -5.45791700 | 4.87444100  |
| N | -9.15843000  | -4.62941800 | -1.36562900 |

|   |              |             |             |
|---|--------------|-------------|-------------|
| O | -10.29245400 | -4.65372600 | -1.81109500 |
| O | -8.17401600  | -4.31107400 | -2.01035100 |
| C | -1.40208200  | -3.73217800 | -1.78030100 |
| C | -2.19418400  | -2.57485300 | -2.01952700 |
| C | -1.80238000  | -1.69670600 | -3.05913400 |
| C | -0.68426500  | -2.00484300 | -3.80192000 |
| C | 0.07914500   | -3.17656700 | -3.54895300 |
| C | -0.28381100  | -4.05961900 | -2.55326700 |
| C | -3.14731500  | -3.79983400 | -0.35609100 |
| C | -3.27245800  | -2.62333600 | -1.11060400 |
| H | -2.38616300  | -0.80711300 | -3.27494500 |
| H | -0.38404500  | -1.34591000 | -4.61067100 |
| H | 0.95207000   | -3.38811500 | -4.15983500 |
| H | 0.28174100   | -4.96267800 | -2.34920900 |
| N | -1.98511200  | -4.43147600 | -0.76451000 |
| H | -1.55364100  | -5.22290700 | -0.31655800 |
| H | -4.10564700  | -1.94092400 | -1.03906500 |
| C | -4.08598600  | -4.26044100 | 0.61945400  |
| H | -4.57416500  | -2.99028400 | 2.17829000  |
| O | -4.97736800  | -3.41677000 | 1.11098300  |
| C | -2.45670200  | -1.44257800 | 1.94838900  |
| C | -1.34600800  | -1.50648200 | 1.13915900  |
| C | -0.42431300  | -2.59441800 | 1.17302900  |
| C | -0.61617300  | -3.55574100 | 2.20484600  |
| C | -1.73866800  | -3.57739200 | 3.00074400  |
| C | -2.76353500  | -2.59571200 | 2.73811400  |
| H | -1.16886400  | -0.70804800 | 0.43201500  |
| H | 0.17446800   | -4.26984800 | 2.39506400  |
| C | 0.66146500   | -2.68523100 | 0.24999300  |
| C | 1.41219600   | -3.89984700 | 0.12984900  |
| C | 1.06801800   | -1.59069400 | -0.57178500 |
| C | 2.47585100   | -4.04883100 | -0.70778600 |
| H | 1.07353000   | -4.75584600 | 0.70199500  |
| C | 2.14170800   | -1.64012700 | -1.41506200 |
| H | 0.51948400   | -0.66179300 | -0.48873400 |
| C | 2.92951300   | -2.88697800 | -1.50303300 |
| O | 3.95109900   | -2.95820400 | -2.20924800 |
| O | -3.99444400  | -2.74823500 | 3.18308300  |
| C | 3.22068800   | -5.37771100 | -0.84627100 |
| C | 3.19291000   | -5.85528300 | -2.31091400 |
| C | 4.68045400   | -5.21089200 | -0.38375100 |
| C | 2.57942200   | -6.47717000 | 0.00798400  |
| H | 2.16608400   | -6.07158400 | -2.63030100 |
| H | 3.61909600   | -5.10523700 | -2.97693300 |

|   |              |              |              |
|---|--------------|--------------|--------------|
| H | 3. 77003100  | -6. 78185800 | -2. 40639200 |
| H | 4. 71242000  | -4. 89574300 | 0. 66446600  |
| H | 5. 20599700  | -6. 16876400 | -0. 46768700 |
| H | 5. 19608400  | -4. 46736200 | -0. 99112400 |
| H | 3. 11534500  | -7. 41839300 | -0. 14961500 |
| H | 2. 61902500  | -6. 24289300 | 1. 07722500  |
| H | 1. 53103400  | -6. 63583200 | -0. 27063400 |
| C | 2. 62270600  | -0. 40830800 | -2. 18745300 |
| C | 3. 98991600  | 0. 02771800  | -1. 62551700 |
| C | 2. 76396100  | -0. 69981600 | -3. 69272000 |
| C | 1. 64782700  | 0. 76626500  | -2. 04150600 |
| H | 3. 90668600  | 0. 26980500  | -0. 56073900 |
| H | 4. 72898900  | -0. 76521700 | -1. 74984700 |
| H | 4. 33976300  | 0. 92261800  | -2. 15248500 |
| H | 1. 78964400  | -0. 94321000 | -4. 12464800 |
| H | 3. 14522800  | 0. 19372700  | -4. 20005700 |
| H | 3. 44944800  | -1. 52680900 | -3. 87171200 |
| H | 2. 00317200  | 1. 60640500  | -2. 64617100 |
| H | 0. 64625000  | 0. 49330400  | -2. 39248300 |
| H | 1. 57214600  | 1. 11319500  | -1. 00575900 |
| C | -3. 32976400 | -0. 17859600 | 2. 02941400  |
| C | -3. 30997400 | 0. 29138400  | 3. 49656600  |
| C | -2. 74783400 | 0. 94403500  | 1. 16002400  |
| C | -4. 79549100 | -0. 37208600 | 1. 59883000  |
| H | -3. 72768400 | -0. 47800700 | 4. 15072900  |
| H | -2. 28733900 | 0. 51065700  | 3. 81987500  |
| H | -3. 90811200 | 1. 20283800  | 3. 60537700  |
| H | -2. 78707100 | 0. 68892100  | 0. 09490100  |
| H | -3. 33737500 | 1. 85372700  | 1. 30685500  |
| H | -1. 71022200 | 1. 17051800  | 1. 42483200  |
| H | -5. 28641900 | 0. 60728300  | 1. 58296500  |
| H | -4. 86841800 | -0. 80762500 | 0. 60057100  |
| H | -5. 34063700 | -1. 01406200 | 2. 29004300  |
| C | -1. 85317300 | -4. 51259900 | 4. 21355900  |
| C | -2. 14708900 | -3. 65511800 | 5. 45934100  |
| C | -2. 97750100 | -5. 54087300 | 4. 03951400  |
| C | -0. 54827000 | -5. 27706800 | 4. 46823800  |
| H | -1. 35461500 | -2. 91561400 | 5. 61277800  |
| H | -3. 09889800 | -3. 13034300 | 5. 35511900  |
| H | -2. 19582600 | -4. 29428500 | 6. 34733400  |
| H | -2. 78412200 | -6. 18550600 | 3. 17269900  |
| H | -3. 04424600 | -6. 18135100 | 4. 92580800  |
| H | -3. 93210600 | -5. 03298600 | 3. 90473200  |
| H | -0. 66074500 | -5. 88024500 | 5. 37408700  |

|           |              |              |             |
|-----------|--------------|--------------|-------------|
| H         | -0.30270200  | -5.95994900  | 3.64773800  |
| H         | 0.29640400   | -4.59755300  | 4.61727700  |
| <b>M3</b> |              |              |             |
| C         | -4.53426100  | -9.89362100  | -0.01589300 |
| C         | -5.17896700  | -11.60317700 | 1.16469400  |
| C         | -6.29976100  | -9.49963100  | 1.80878700  |
| H         | -6.00024000  | -8.45124000  | 1.80140500  |
| N         | -4.35519100  | -12.09390600 | 0.28005100  |
| N         | -3.96948600  | -11.02143100 | -0.45547100 |
| N         | -5.32457000  | -10.25511700 | 1.00690600  |
| C         | -5.85230700  | -12.22792100 | 2.34308400  |
| H         | -5.35952400  | -13.16297200 | 2.60691100  |
| H         | -6.91126100  | -12.42534100 | 2.13029300  |
| C         | -6.35522100  | -10.08096500 | 3.27399700  |
| O         | -5.67266100  | -11.31676900 | 3.41046300  |
| C         | -8.56753100  | -10.11606600 | 2.27963600  |
| C         | -7.69800600  | -9.70885900  | 1.26801500  |
| C         | -8.12313100  | -9.55937100  | -0.04377800 |
| C         | -9.45671900  | -9.84520500  | -0.30037800 |
| C         | -10.35488100 | -10.24997800 | 0.68348900  |
| C         | -9.90488600  | -10.38400000 | 1.99148000  |
| C         | -7.85982000  | -10.19578300 | 3.60492000  |
| H         | -7.46755300  | -9.22712900  | -0.83925400 |
| H         | -11.38271500 | -10.45851600 | 0.41395100  |
| H         | -10.58660400 | -10.70389300 | 2.77195200  |
| H         | -8.05929800  | -11.12418200 | 4.14755000  |
| H         | -8.16895500  | -9.36831600  | 4.25090600  |
| C         | -3.09338600  | -11.18823600 | -1.58955900 |
| C         | -3.58715300  | -10.89838900 | -2.86271900 |
| C         | -1.77513200  | -11.58318900 | -1.33660900 |
| C         | -2.67414400  | -10.95735300 | -3.91673200 |
| C         | -0.91264600  | -11.63017500 | -2.42641300 |
| C         | -1.33701000  | -11.29639500 | -3.71594400 |
| H         | -3.02350100  | -10.72794100 | -4.91997800 |
| H         | 0.12400000   | -11.91274900 | -2.26185200 |
| C         | -1.29707100  | -11.91761500 | 0.05177200  |
| H         | -0.20758000  | -11.88524800 | 0.09514700  |
| H         | -1.62303000  | -12.91975300 | 0.34454200  |
| H         | -1.69286000  | -11.22784500 | 0.80484600  |
| C         | -0.35379700  | -11.26362500 | -4.85411000 |
| H         | -0.85096800  | -11.40441900 | -5.81572900 |
| H         | 0.41215400   | -12.03347300 | -4.73823900 |
| H         | 0.15066100   | -10.29106900 | -4.87440700 |
| C         | -5.03156700  | -10.54752400 | -3.11623400 |

|   |              |              |             |
|---|--------------|--------------|-------------|
| H | -5.70591900  | -11.07447000 | -2.43531000 |
| H | -5.30457500  | -10.82344200 | -4.13575800 |
| H | -5.21397200  | -9.47180000  | -3.01528400 |
| H | -5.83834200  | -9.40896200  | 3.95789500  |
| N | -9.93667300  | -9.72025700  | -1.68322500 |
| O | -11.11671900 | -9.93100500  | -1.89642800 |
| O | -9.12461400  | -9.41673100  | -2.53979500 |
| C | -1.11106600  | -8.13798100  | -1.87916300 |
| C | -1.83474700  | -7.39847200  | -2.85036500 |
| C | -1.16392400  | -6.92299800  | -3.99751700 |
| C | 0.18137700   | -7.18554500  | -4.12767100 |
| C | 0.88647100   | -7.91359700  | -3.13575100 |
| C | 0.26300000   | -8.39467600  | -2.00315700 |
| C | -3.24640300  | -8.05897400  | -1.22919100 |
| C | -3.18406500  | -7.34212900  | -2.40860400 |
| H | -1.70339500  | -6.36575400  | -4.75608700 |
| H | 0.71869900   | -6.83329800  | -5.00143800 |
| H | 1.94564500   | -8.10211100  | -3.27770900 |
| H | 0.80083300   | -8.96168500  | -1.25066500 |
| N | -1.98937900  | -8.53513200  | -0.90973600 |
| H | -1.72215500  | -8.95925300  | -0.03301800 |
| H | -4.03290600  | -6.90584000  | -2.91625200 |
| C | -4.47445300  | -8.49469700  | -0.59691100 |
| O | -5.51364500  | -7.86065100  | -0.57599200 |

**TS3<sup>HCT\_C2</sup>**

|   |             |             |             |
|---|-------------|-------------|-------------|
| C | -4.90590800 | -5.77313800 | 1.05071200  |
| C | -6.75226100 | -6.18471700 | 2.19604800  |
| C | -5.98574000 | -3.87060700 | 2.47333100  |
| H | -5.00835200 | -3.36365700 | 2.58700700  |
| N | -6.52842100 | -7.29188500 | 1.55102600  |
| N | -5.38494400 | -7.03457700 | 0.81995100  |
| N | -5.81390100 | -5.22436600 | 1.92684100  |
| C | -7.82725100 | -5.87279600 | 3.18682300  |
| H | -8.24389300 | -6.79809600 | 3.58936700  |
| H | -8.63919800 | -5.30280500 | 2.71020100  |
| C | -6.62137100 | -3.91650600 | 3.91100800  |
| O | -7.23334000 | -5.16459300 | 4.26075000  |
| C | -7.90473700 | -2.42813200 | 2.47879300  |
| C | -6.96757400 | -3.06041600 | 1.65077000  |
| C | -7.01262500 | -2.91186100 | 0.26901200  |
| C | -8.03712900 | -2.12710800 | -0.25870700 |
| C | -8.98148500 | -1.48172100 | 0.54263100  |
| C | -8.91022400 | -1.63192300 | 1.92646000  |
| C | -7.62518100 | -2.73354800 | 3.92984300  |

|   |             |              |             |
|---|-------------|--------------|-------------|
| H | -6.28117300 | -3.36535800  | -0.38697400 |
| H | -9.75223200 | -0.88241100  | 0.07415200  |
| H | -9.63977800 | -1.13858000  | 2.56257200  |
| H | -8.51723300 | -2.98963900  | 4.51174400  |
| H | -7.15769200 | -1.86782000  | 4.41621300  |
| C | -4.98024000 | -8.02880200  | -0.13675900 |
| C | -5.11542200 | -7.76303100  | -1.51054200 |
| C | -4.52462600 | -9.26916200  | 0.35347900  |
| C | -4.71994300 | -8.76778400  | -2.39923400 |
| C | -4.14584400 | -10.23293700 | -0.58466600 |
| C | -4.22354500 | -9.99917000  | -1.96289600 |
| H | -4.81132700 | -8.57966000  | -3.46612500 |
| H | -3.78541500 | -11.19442800 | -0.22658000 |
| C | -4.44291300 | -9.56421900  | 1.83365500  |
| H | -5.44175000 | -9.62847700  | 2.27750300  |
| H | -3.90321900 | -8.78295600  | 2.38241300  |
| H | -3.92811800 | -10.51306900 | 2.00619700  |
| C | -3.76795900 | -11.04486000 | -2.95157500 |
| H | -2.69234700 | -10.95026300 | -3.14992400 |
| H | -4.28578600 | -10.94216500 | -3.91020800 |
| H | -3.94290900 | -12.05754600 | -2.57427000 |
| C | -5.66640100 | -6.46022300  | -2.03811900 |
| H | -6.53329900 | -6.11835600  | -1.46307700 |
| H | -5.98186800 | -6.57534600  | -3.07830500 |
| H | -4.91563700 | -5.66161000  | -2.01112100 |
| H | -5.83365600 | -3.78343400  | 4.65231500  |
| N | -8.13095400 | -1.98379400  | -1.72011200 |
| O | -8.99293500 | -1.22852900  | -2.16821400 |
| O | -7.34680800 | -2.63664100  | -2.40988100 |
| C | -0.93516000 | -7.10039400  | -0.62874300 |
| C | -0.55741600 | -5.81572000  | -1.11839100 |
| C | 0.66170400  | -5.67935900  | -1.81623100 |
| C | 1.44172100  | -6.80555700  | -2.01997200 |
| C | 1.04086000  | -8.07224700  | -1.53339000 |
| C | -0.14556400 | -8.23897200  | -0.83191800 |
| C | -2.57256200 | -5.64111300  | -0.07939300 |
| C | -1.59782800 | -4.91695000  | -0.75891000 |
| H | 0.97916300  | -4.70733700  | -2.18171800 |
| H | 2.37960800  | -6.71869000  | -2.56018800 |
| H | 1.67881100  | -8.93367100  | -1.71104700 |
| H | -0.44865600 | -9.21245700  | -0.45614900 |
| N | -2.14008300 | -6.96450800  | 0.02048400  |
| H | -2.70179600 | -7.74318500  | 0.32675000  |
| H | -1.64814800 | -3.85546100  | -0.94976200 |



|   |             |             |             |
|---|-------------|-------------|-------------|
| C | -3.76628700 | -5.04176700 | 0.49224900  |
| H | -2.93644400 | -3.02166200 | 1.71626600  |
| O | -3.85074900 | -3.77621800 | 0.54796000  |
| C | -2.20971100 | -1.13660200 | 1.97244100  |
| C | -1.03440100 | -1.12339900 | 1.28273900  |
| C | -0.04263600 | -2.16500100 | 1.37553200  |
| C | -0.24227800 | -3.14202900 | 2.41471800  |
| C | -1.40326400 | -3.26482600 | 3.11532300  |
| C | -2.61320200 | -2.41820800 | 2.70604700  |
| H | -0.77601800 | -0.24841100 | 0.70250500  |
| H | 0.57534500  | -3.81173400 | 2.63794500  |
| C | 1.09570400  | -2.18274300 | 0.52997100  |
| C | 2.23259500  | -3.02273900 | 0.78989900  |
| C | 1.16090400  | -1.35755800 | -0.64605900 |
| C | 3.35349000  | -3.04552900 | 0.01018900  |
| H | 2.21123400  | -3.63835500 | 1.67835800  |
| C | 2.22195300  | -1.34193200 | -1.50598500 |
| H | 0.29469600  | -0.75269600 | -0.87795400 |
| C | 3.39944200  | -2.19488500 | -1.20548400 |
| O | 4.39608600  | -2.19858900 | -1.95374800 |
| O | -3.68042300 | -2.40913600 | 3.49776400  |
| C | 4.57729700  | -3.91027600 | 0.36313300  |
| C | 4.86488800  | -4.91883600 | -0.77695800 |
| C | 5.81496600  | -3.00330000 | 0.57878600  |
| C | 4.36065100  | -4.72023300 | 1.65668300  |
| H | 4.01159500  | -5.59312600 | -0.91824400 |
| H | 5.06422200  | -4.40073200 | -1.71581900 |
| H | 5.73885900  | -5.53141500 | -0.52074300 |
| H | 5.64395200  | -2.30372200 | 1.40625900  |
| H | 6.68782600  | -3.61781400 | 0.83375700  |
| H | 6.04226100  | -2.43086500 | -0.32142600 |
| H | 5.25497400  | -5.31986200 | 1.86082400  |
| H | 4.19494200  | -4.07310700 | 2.52637500  |
| H | 3.51320900  | -5.41116900 | 1.57382200  |
| C | 2.23546000  | -0.46876900 | -2.77283200 |
| C | 3.41120400  | 0.53859000  | -2.70394500 |
| C | 2.38899600  | -1.36120100 | -4.03000500 |
| C | 0.93497000  | 0.34340600  | -2.93378600 |
| H | 3.30327200  | 1.20170100  | -1.83677000 |
| H | 4.36707000  | 0.01895800  | -2.62908300 |
| H | 3.41948700  | 1.16405400  | -3.60571000 |
| H | 1.54390100  | -2.05592100 | -4.11765400 |
| H | 2.40216300  | -0.73691200 | -4.93242100 |
| H | 3.31417200  | -1.93746900 | -3.99060800 |

|   |             |             |             |
|---|-------------|-------------|-------------|
| H | 0.99694700  | 0.94565500  | -3.84718400 |
| H | 0.05216000  | -0.30081300 | -3.02571800 |
| H | 0.77168700  | 1.03354800  | -2.09740900 |
| C | -3.14804900 | 0.07519800  | 1.97751800  |
| C | -3.28402600 | 0.57443000  | 3.43908000  |
| C | -2.61556700 | 1.24230800  | 1.12169400  |
| C | -4.54139700 | -0.31070600 | 1.43180000  |
| H | -3.64766100 | -0.22950500 | 4.08163900  |
| H | -2.31790400 | 0.92548000  | 3.82125500  |
| H | -3.98771900 | 1.41595900  | 3.47999600  |
| H | -2.52596800 | 0.97126500  | 0.06317600  |
| H | -3.31660400 | 2.08211300  | 1.18737200  |
| H | -1.64097700 | 1.60206800  | 1.47039300  |
| H | -5.18843500 | 0.57528200  | 1.40776000  |
| H | -4.47028100 | -0.70755600 | 0.41254200  |
| H | -4.99941200 | -1.06460200 | 2.06954900  |
| C | -1.52549400 | -4.25640900 | 4.28126800  |
| C | -1.79116400 | -3.44595200 | 5.57640900  |
| C | -2.68699800 | -5.25067400 | 4.04957600  |
| C | -0.24338400 | -5.08690000 | 4.49494200  |
| H | -0.94215700 | -2.78936600 | 5.80024900  |
| H | -2.68852900 | -2.83535200 | 5.46376000  |
| H | -1.92091700 | -4.13016400 | 6.42502700  |
| H | -2.51367800 | -5.84624700 | 3.14389400  |
| H | -2.76051000 | -5.94224800 | 4.89827600  |
| H | -3.62909100 | -4.71216100 | 3.95417100  |
| H | -0.38724000 | -5.75371500 | 5.35290700  |
| H | -0.00526600 | -5.71214300 | 3.62620800  |
| H | 0.62552700  | -4.45685400 | 4.71453400  |

**TS3<sup>HCT\_C3</sup>**

|   |             |             |             |
|---|-------------|-------------|-------------|
| C | -2.56994900 | -4.52127900 | -0.75383700 |
| C | -2.19389700 | -6.54622200 | 0.01778800  |
| C | -3.59309800 | -5.18847200 | 1.51120200  |
| H | -3.60314200 | -4.14141400 | 1.80610400  |
| N | -1.72663100 | -6.57363500 | -1.18955400 |
| N | -1.98053900 | -5.32052100 | -1.67780200 |
| N | -2.72002200 | -5.32402200 | 0.33803600  |
| C | -2.19902600 | -7.60783600 | 1.06608300  |
| H | -1.36909300 | -8.29811400 | 0.90875300  |
| H | -3.14004300 | -8.17487200 | 1.03981600  |
| C | -3.08463100 | -6.11045200 | 2.67875700  |
| O | -2.00943300 | -6.95552800 | 2.30555400  |
| C | -5.37138800 | -6.69367000 | 2.09720800  |
| C | -4.97452800 | -5.71237800 | 1.19054800  |

|   |             |             |             |
|---|-------------|-------------|-------------|
| C | -5.77804300 | -5.33636100 | 0.12395200  |
| C | -6.98846800 | -6.00157100 | -0.00849000 |
| C | -7.41893000 | -6.98657700 | 0.87719600  |
| C | -6.60173400 | -7.33320800 | 1.94697500  |
| C | -4.32537500 | -6.90190800 | 3.15998100  |
| H | -5.49238600 | -4.55457900 | -0.57041800 |
| H | -8.37591200 | -7.46678100 | 0.71640400  |
| H | -6.91847200 | -8.09970600 | 2.64604600  |
| H | -4.06988400 | -7.95446900 | 3.31576700  |
| H | -4.67658100 | -6.51408500 | 4.12187100  |
| C | -1.83903200 | -5.08586700 | -3.08770500 |
| C | -2.98550700 | -4.80686900 | -3.83989500 |
| C | -0.55572700 | -5.13918400 | -3.64037900 |
| C | -2.78937200 | -4.42859300 | -5.16770100 |
| C | -0.41863800 | -4.76188600 | -4.97413100 |
| C | -1.51740300 | -4.36014000 | -5.73716700 |
| H | -3.65835200 | -4.17860700 | -5.77149100 |
| H | 0.57304900  | -4.76808500 | -5.42066800 |
| C | 0.61479100  | -5.60894400 | -2.82416100 |
| H | 0.63659400  | -6.70304800 | -2.79192000 |
| H | 0.54399700  | -5.26901400 | -1.78760200 |
| H | 1.56042200  | -5.26161200 | -3.24019600 |
| C | -1.33687200 | -3.84423200 | -7.13894000 |
| H | -1.27772700 | -2.74989500 | -7.12020600 |
| H | -2.17890600 | -4.12293700 | -7.77672400 |
| H | -0.41591800 | -4.22274100 | -7.58764300 |
| C | -4.37853400 | -4.93116900 | -3.27599500 |
| H | -4.44517600 | -5.74009900 | -2.54110000 |
| H | -5.08569400 | -5.14992500 | -4.07810600 |
| H | -4.70971800 | -4.00574200 | -2.79388500 |
| H | -2.67073100 | -5.48702800 | 3.46943300  |
| N | -7.84807900 | -5.65302400 | -1.14648300 |
| O | -8.93615500 | -6.19450800 | -1.22699800 |
| O | -7.42153900 | -4.84407700 | -1.95306000 |
| C | -1.41709500 | -1.46430200 | -3.69091700 |
| C | -2.73599900 | -0.95596500 | -3.81905200 |
| C | -3.03450800 | -0.09763500 | -4.89402000 |
| C | -2.03422600 | 0.22002500  | -5.79281100 |
| C | -0.72970600 | -0.30103900 | -5.64681300 |
| C | -0.40241000 | -1.14815500 | -4.60210800 |
| C | -2.65684000 | -2.33617000 | -2.03356400 |
| C | -3.50116800 | -1.51461100 | -2.75086500 |
| H | -4.03675900 | 0.30198500  | -5.01262700 |
| H | -2.25001300 | 0.87818100  | -6.62795800 |

|   |             |             |             |
|---|-------------|-------------|-------------|
| H | 0.03159500  | -0.03761700 | -6.37422200 |
| H | 0.59660300  | -1.55969100 | -4.49986600 |
| N | -1.38919400 | -2.27328500 | -2.58218200 |
| H | -0.57660500 | -2.77581500 | -2.24649500 |
| H | -4.55276300 | -1.37634300 | -2.54334700 |
| C | -3.02664100 | -3.15276500 | -0.88546300 |
| H | -3.46680800 | -1.83743400 | 0.64102400  |
| O | -3.99579500 | -2.76282100 | -0.12271700 |
| C | -2.59254100 | -1.08266000 | 1.27201900  |
| C | -1.42144600 | -1.68355600 | 0.71723000  |
| C | -0.74457500 | -2.75259700 | 1.31745900  |
| C | -1.17012800 | -3.14992600 | 2.65828800  |
| C | -2.15634800 | -2.53542000 | 3.35474800  |
| C | -2.97765300 | -1.49142700 | 2.66285300  |
| H | -1.04334000 | -1.29135300 | -0.21692200 |
| H | -0.56669900 | -3.90097300 | 3.15633300  |
| C | 0.40571600  | -3.35676700 | 0.73284000  |
| C | 0.85107300  | -4.65689100 | 1.10871900  |
| C | 1.16616200  | -2.66621000 | -0.25989300 |
| C | 1.92202600  | -5.27855300 | 0.52415500  |
| H | 0.27137300  | -5.19600200 | 1.85156800  |
| C | 2.26333600  | -3.19978600 | -0.87463300 |
| H | 0.89604700  | -1.63722800 | -0.46916800 |
| C | 2.65606500  | -4.58857900 | -0.55520200 |
| O | 3.57117500  | -5.15440500 | -1.18313500 |
| O | -3.95875500 | -1.00109200 | 3.21368800  |
| C | 2.34168000  | -6.69536800 | 0.91889200  |
| C | 2.08856400  | -7.65014300 | -0.26156600 |
| C | 3.83128800  | -6.72674800 | 1.31055800  |
| C | 1.54476500  | -7.21178600 | 2.12258500  |
| H | 1.02267300  | -7.65052400 | -0.52130800 |
| H | 2.66240200  | -7.34198800 | -1.13728200 |
| H | 2.37707200  | -8.67149800 | 0.01210500  |
| H | 4.01191700  | -6.07659100 | 2.17326900  |
| H | 4.11410300  | -7.74726000 | 1.59168600  |
| H | 4.46137700  | -6.40022600 | 0.48456200  |
| H | 1.89898000  | -8.21352200 | 2.38446500  |
| H | 1.67542200  | -6.56813800 | 2.99950100  |
| H | 0.47247700  | -7.28085300 | 1.91333300  |
| C | 3.11424100  | -2.38503100 | -1.85206100 |
| C | 4.56377400  | -2.31498200 | -1.33582600 |
| C | 3.10117400  | -3.02624800 | -3.25125700 |
| C | 2.59924400  | -0.94712700 | -1.99409600 |
| H | 4.59446200  | -1.84076600 | -0.34927600 |

|   |             |             |             |
|---|-------------|-------------|-------------|
| H | 4.99707900  | -3.31261800 | -1.26108400 |
| H | 5.17239300  | -1.71394000 | -2.02019500 |
| H | 2.07672000  | -3.08306000 | -3.63955200 |
| H | 3.69158900  | -2.41552300 | -3.94348200 |
| H | 3.51952700  | -4.03258600 | -3.21989700 |
| H | 3.23205300  | -0.40783800 | -2.70533500 |
| H | 1.57117500  | -0.91134100 | -2.37354700 |
| H | 2.63091000  | -0.40813100 | -1.04157200 |
| C | -2.95353200 | 0.38331800  | 0.87624500  |
| C | -2.54537900 | 1.33453300  | 2.01635500  |
| C | -2.18870800 | 0.83120800  | -0.37649100 |
| C | -4.45741500 | 0.51994700  | 0.59738000  |
| H | -3.14448600 | 1.17204200  | 2.91346800  |
| H | -1.48827900 | 1.19558100  | 2.26985800  |
| H | -2.68331800 | 2.37169400  | 1.69326300  |
| H | -2.37265800 | 0.17471400  | -1.23236600 |
| H | -2.52414100 | 1.83603700  | -0.65156900 |
| H | -1.10960900 | 0.88078900  | -0.19613600 |
| H | -4.70292400 | 1.56453600  | 0.37759400  |
| H | -4.73986800 | -0.08661000 | -0.26950100 |
| H | -5.04245000 | 0.19509200  | 1.45909800  |
| C | -2.40984600 | -2.78666600 | 4.84339400  |
| C | -2.22412100 | -1.45833700 | 5.60691300  |
| C | -3.83774100 | -3.31125700 | 5.08555400  |
| C | -1.40848000 | -3.78812800 | 5.43324600  |
| H | -1.22211800 | -1.05279100 | 5.43353900  |
| H | -2.96253200 | -0.71721100 | 5.30071500  |
| H | -2.33556800 | -1.64000000 | 6.68081400  |
| H | -4.00791900 | -4.26361500 | 4.57200700  |
| H | -3.98324800 | -3.48602400 | 6.15658400  |
| H | -4.58196000 | -2.59544300 | 4.73941400  |
| H | -1.62101400 | -3.91596800 | 6.49827500  |
| H | -1.46694700 | -4.77828300 | 4.96922800  |
| H | -0.37910400 | -3.42868900 | 5.33753000  |

**TS3<sup>HCT\_C4</sup>**

|   |             |             |             |
|---|-------------|-------------|-------------|
| C | -2.85270500 | -4.88709000 | -0.18987800 |
| C | -4.20544500 | -5.89995300 | 1.21732400  |
| C | -4.48869000 | -3.46657200 | 1.22520400  |
| H | -3.81091500 | -2.61309700 | 1.21954700  |
| N | -3.65098300 | -6.86259300 | 0.54799600  |
| N | -2.82747100 | -6.23336400 | -0.33629600 |
| N | -3.75181300 | -4.67232700 | 0.81828800  |
| C | -5.23327700 | -5.96737300 | 2.29776500  |
| H | -5.16302700 | -6.91871000 | 2.82492900  |

|   |             |             |             |
|---|-------------|-------------|-------------|
| H | -6.23983400 | -5.87623300 | 1.86385200  |
| C | -5.10998900 | -3.62776400 | 2.66160000  |
| O | -4.95375600 | -4.92719100 | 3.20643400  |
| C | -6.85913500 | -3.13241800 | 1.04607000  |
| C | -5.67947600 | -3.26641400 | 0.31358700  |
| C | -5.68450600 | -3.25249500 | -1.07464400 |
| C | -6.91691100 | -3.10428900 | -1.69578800 |
| C | -8.11166600 | -2.95430200 | -0.99631200 |
| C | -8.07986100 | -2.96603100 | 0.39309400  |
| C | -6.59267700 | -3.20680300 | 2.52378300  |
| H | -4.78108000 | -3.34200100 | -1.66543500 |
| H | -9.04039400 | -2.84112300 | -1.54124200 |
| H | -8.99989300 | -2.86115200 | 0.95812000  |
| H | -7.24534400 | -3.91906900 | 3.03842100  |
| H | -6.74701500 | -2.23034100 | 2.99440200  |
| C | -2.20877600 | -7.01137600 | -1.37118300 |
| C | -2.72067900 | -6.92073900 | -2.66775700 |
| C | -1.11609400 | -7.80728200 | -1.02503300 |
| C | -2.01813200 | -7.59451200 | -3.66587600 |
| C | -0.45685400 | -8.46961000 | -2.05810500 |
| C | -0.87778200 | -8.34913300 | -3.38485000 |
| H | -2.36839900 | -7.51974900 | -4.69254700 |
| H | 0.41353600  | -9.07769900 | -1.82308100 |
| C | -0.67086000 | -7.90661900 | 0.40842900  |
| H | -1.43624900 | -8.39073500 | 1.02195500  |
| H | -0.50308500 | -6.91054700 | 0.83670700  |
| H | 0.25414200  | -8.47994700 | 0.49018600  |
| C | -0.12660900 | -9.03119900 | -4.49729500 |
| H | 0.89240200  | -9.27687000 | -4.19051200 |
| H | -0.07405500 | -8.38546600 | -5.37729900 |
| H | -0.62530700 | -9.96054400 | -4.79077600 |
| C | -3.96722900 | -6.13343300 | -2.98057600 |
| H | -4.70828700 | -6.22237100 | -2.17992400 |
| H | -4.41973700 | -6.49909700 | -3.90388800 |
| H | -3.74532000 | -5.07132900 | -3.12358100 |
| H | -4.58951100 | -2.96738700 | 3.35335900  |
| N | -6.95426700 | -3.11864900 | -3.16304900 |
| O | -8.02712200 | -2.93127900 | -3.70833600 |
| O | -5.90892700 | -3.32391400 | -3.75739400 |
| C | 0.30574400  | -5.10597500 | -3.28826900 |
| C | -0.44960900 | -4.28184700 | -4.16178600 |
| C | -0.11343000 | -4.24974900 | -5.52910500 |
| C | 0.96009600  | -5.00067700 | -5.96764900 |
| C | 1.71627200  | -5.79005800 | -5.07120200 |

|   |             |             |             |
|---|-------------|-------------|-------------|
| C | 1.40349000  | -5.85658500 | -3.72614600 |
| C | -1.30465300 | -4.12482100 | -2.08274900 |
| C | -1.44894900 | -3.64362900 | -3.36730100 |
| H | -0.68514300 | -3.63716300 | -6.21929500 |
| H | 1.23541700  | -4.98447400 | -7.01715600 |
| H | 2.55812300  | -6.36145500 | -5.44934400 |
| H | 1.97515600  | -6.46874900 | -3.03581900 |
| N | -0.24301700 | -4.99988900 | -2.03834800 |
| H | 0.16772700  | -5.36078400 | -1.18751200 |
| H | -2.23047000 | -2.97187800 | -3.69438000 |
| C | -2.20587600 | -3.83460200 | -0.96879900 |
| H | -2.13078800 | -1.87761700 | 0.17270200  |
| O | -2.68887900 | -2.66132700 | -0.82714300 |
| C | -2.48889900 | -0.69614300 | 1.95641500  |
| C | -1.51336200 | -1.28935500 | 1.08655700  |
| C | -0.72239300 | -2.44831700 | 1.50822100  |
| C | -0.98560400 | -2.94942300 | 2.81616700  |
| C | -1.87791600 | -2.36990000 | 3.67994200  |
| C | -2.78170900 | -1.28025800 | 3.22423700  |
| H | -0.99320100 | -0.58466400 | 0.44008200  |
| H | -0.37579400 | -3.76479200 | 3.17834300  |
| C | 0.23194200  | -3.02756800 | 0.64180500  |
| C | 0.99227300  | -4.19668000 | 1.01779300  |
| C | 0.67805200  | -2.31709100 | -0.53256600 |
| C | 2.11102400  | -4.60432800 | 0.35915800  |
| H | 0.66606200  | -4.75628200 | 1.88611100  |
| C | 1.80040400  | -2.63049500 | -1.22887100 |
| H | 0.09989400  | -1.46049500 | -0.85109700 |
| C | 2.57324900  | -3.83194000 | -0.82728600 |
| O | 3.57812400  | -4.18256900 | -1.45387600 |
| O | -3.73324700 | -0.89649500 | 3.96495500  |
| C | 2.94354200  | -5.80373400 | 0.81877200  |
| C | 2.96802800  | -6.87663200 | -0.28550400 |
| C | 4.38352600  | -5.35500900 | 1.13821000  |
| C | 2.37961900  | -6.43561600 | 2.09717500  |
| H | 1.94845000  | -7.18212400 | -0.55531200 |
| H | 3.46865100  | -6.49949700 | -1.17817900 |
| H | 3.50026800  | -7.76616800 | 0.06883000  |
| H | 4.37866700  | -4.60063900 | 1.93181500  |
| H | 4.96036100  | -6.21559700 | 1.49358600  |
| H | 4.87610100  | -4.94053800 | 0.25989300  |
| H | 3.01900400  | -7.27257300 | 2.39250600  |
| H | 2.36221200  | -5.72028800 | 2.92617700  |
| H | 1.36877600  | -6.82837700 | 1.95818200  |

|                          |              |              |              |
|--------------------------|--------------|--------------|--------------|
| C                        | 2. 35554200  | -1. 72707500 | -2. 33376500 |
| C                        | 3. 68980000  | -1. 13759900 | -1. 83399400 |
| C                        | 2. 59890400  | -2. 47904100 | -3. 65502800 |
| C                        | 1. 40225700  | -0. 56523800 | -2. 63775400 |
| H                        | 3. 53984900  | -0. 57205100 | -0. 90836900 |
| H                        | 4. 42023400  | -1. 92755500 | -1. 65003700 |
| H                        | 4. 09639300  | -0. 45604800 | -2. 58897200 |
| H                        | 1. 65952400  | -2. 84912100 | -4. 07247000 |
| H                        | 3. 04030000  | -1. 78353600 | -4. 37812100 |
| H                        | 3. 27434600  | -3. 32166600 | -3. 51793600 |
| H                        | 1. 82742200  | 0. 04476800  | -3. 44014600 |
| H                        | 0. 42554600  | -0. 93193600 | -2. 97358700 |
| H                        | 1. 25345200  | 0. 08603300  | -1. 76984400 |
| C                        | -3. 28697300 | 0. 51540800  | 1. 47446000  |
| C                        | -4. 75789900 | 0. 09634700  | 1. 27614000  |
| C                        | -3. 20549900 | 1. 65453300  | 2. 50624000  |
| C                        | -2. 77445700 | 1. 05658400  | 0. 13306000  |
| H                        | -4. 84116700 | -0. 62352900 | 0. 45276900  |
| H                        | -5. 14994200 | -0. 34966100 | 2. 19331600  |
| H                        | -5. 36825500 | 0. 96910300  | 1. 01719500  |
| H                        | -2. 16756100 | 1. 98138800  | 2. 62910200  |
| H                        | -3. 79270300 | 2. 51227900  | 2. 15950000  |
| H                        | -3. 58854000 | 1. 32429700  | 3. 47163900  |
| H                        | -3. 40325300 | 1. 89692700  | -0. 17695200 |
| H                        | -1. 74541800 | 1. 42554600  | 0. 20709800  |
| H                        | -2. 81629200 | 0. 29939700  | -0. 65792600 |
| C                        | -1. 90736100 | -2. 77866000 | 5. 15761400  |
| C                        | -1. 59218700 | -1. 52245600 | 5. 99469200  |
| C                        | -3. 27586400 | -3. 34222700 | 5. 58142400  |
| C                        | -0. 85024500 | -3. 83970100 | 5. 48947700  |
| H                        | -0. 60275200 | -1. 12835100 | 5. 74030100  |
| H                        | -2. 34071900 | -0. 74934800 | 5. 82032600  |
| H                        | -1. 59112100 | -1. 78573700 | 7. 05789000  |
| H                        | -3. 53271300 | -4. 22962000 | 4. 99418400  |
| H                        | -3. 22783500 | -3. 63663500 | 6. 63582100  |
| H                        | -4. 05546700 | -2. 59074800 | 5. 46012500  |
| H                        | -0. 89153800 | -4. 05663500 | 6. 56081000  |
| H                        | -1. 03172700 | -4. 77886200 | 4. 95562900  |
| H                        | 0. 16331500  | -3. 49687800 | 5. 25768000  |
| <b>TS3<sup>HCT</sup></b> |              |              |              |
| C                        | -1. 13520200 | -4. 95080100 | -1. 67804200 |
| C                        | -0. 75244500 | -7. 11389000 | -1. 58684100 |
| C                        | -1. 83826500 | -6. 26313300 | 0. 44208200  |
| H                        | -1. 75119500 | -5. 35550600 | 1. 03672700  |



|   |             |             |             |
|---|-------------|-------------|-------------|
| N | -0.42621300 | -6.77863000 | -2.79617300 |
| N | -0.68143300 | -5.43509600 | -2.85170600 |
| N | -1.17801600 | -6.03982600 | -0.85452700 |
| C | -0.73646200 | -8.45610700 | -0.93291600 |
| H | -0.00444100 | -9.10172400 | -1.41815900 |
| H | -1.72870300 | -8.92366800 | -1.00795900 |
| C | -1.20253100 | -7.48322900 | 1.20466800  |
| O | -0.33767100 | -8.27502300 | 0.40843100  |
| C | -3.58781700 | -7.82659000 | 0.94313100  |
| C | -3.28132100 | -6.66996600 | 0.22731300  |
| C | -4.21529100 | -6.05659900 | -0.59464200 |
| C | -5.46422400 | -6.65630500 | -0.67693100 |
| C | -5.80814200 | -7.80523400 | 0.03078300  |
| C | -4.85719900 | -8.39567300 | 0.85482900  |
| C | -2.40349800 | -8.29297700 | 1.74524400  |
| H | -4.00014200 | -5.14973300 | -1.14635000 |
| H | -6.80098800 | -8.22284100 | -0.07914000 |
| H | -5.10089700 | -9.29583500 | 1.40849100  |
| H | -2.20967100 | -9.36495300 | 1.64914300  |
| H | -2.55628800 | -8.08204400 | 2.80856000  |
| C | -0.70426200 | -4.78774500 | -4.13362400 |
| C | -1.94724600 | -4.46189600 | -4.68711500 |
| C | 0.51428300  | -4.49801500 | -4.75270300 |
| C | -1.93687600 | -3.73290700 | -5.87461400 |
| C | 0.46644500  | -3.76139900 | -5.93618200 |
| C | -0.74594400 | -3.35063500 | -6.49529000 |
| H | -2.88620500 | -3.44752500 | -6.32125500 |
| H | 1.40040700  | -3.49892900 | -6.42700300 |
| C | 1.81591300  | -4.94050300 | -4.14553100 |
| H | 1.91803000  | -6.02917800 | -4.20063000 |
| H | 1.87748400  | -4.66968800 | -3.08726900 |
| H | 2.66101600  | -4.48303700 | -4.66148200 |
| C | -0.77781500 | -2.49475200 | -7.73318000 |
| H | -1.54808100 | -2.83678200 | -8.42881000 |
| H | 0.18506000  | -2.50142400 | -8.24756900 |
| H | -1.01268600 | -1.45920300 | -7.46325700 |
| C | -3.25014500 | -4.84658900 | -4.03334900 |
| H | -3.17383200 | -5.79809900 | -3.49781600 |
| H | -4.03255500 | -4.94876600 | -4.78729000 |
| H | -3.57979700 | -4.07787200 | -3.32501300 |
| H | -0.56590700 | -7.12097400 | 2.01464000  |
| N | -6.46207800 | -6.05154500 | -1.56778800 |
| O | -7.57747800 | -6.54018600 | -1.58987000 |
| O | -6.11699700 | -5.09606500 | -2.24234000 |

|   |             |             |             |
|---|-------------|-------------|-------------|
| C | -1.16367700 | -0.94075300 | -3.76302900 |
| C | -2.39998000 | -0.55811700 | -3.18281400 |
| C | -3.05155200 | 0.59388300  | -3.66489700 |
| C | -2.46608900 | 1.31161400  | -4.68957400 |
| C | -1.23598600 | 0.90738700  | -5.25563600 |
| C | -0.56937600 | -0.21823400 | -4.80626500 |
| C | -1.67593600 | -2.45501500 | -2.18966200 |
| C | -2.70351100 | -1.53015500 | -2.18334500 |
| H | -3.99860600 | 0.90683500  | -3.23596100 |
| H | -2.95545900 | 2.20104400  | -5.07236200 |
| H | -0.80554200 | 1.49218800  | -6.06222600 |
| H | 0.37344700  | -0.53390900 | -5.24365600 |
| N | -0.74119100 | -2.07947100 | -3.12920000 |
| H | 0.15362800  | -2.52544200 | -3.26752100 |
| H | -3.57792600 | -1.58520900 | -1.55134200 |
| C | -1.64011000 | -3.62875400 | -1.31838400 |
| H | -1.64350400 | -3.05021400 | 0.67916300  |
| O | -2.39959300 | -3.61373700 | -0.28328000 |
| C | -1.67782200 | -0.47347900 | 2.17384700  |
| C | -1.14304900 | -1.13265500 | 1.12499900  |
| C | -0.62185800 | -2.50592100 | 1.18577400  |
| C | -0.59782400 | -3.09245900 | 2.53226400  |
| C | -1.11964100 | -2.50216600 | 3.62827600  |
| C | -1.67668400 | -1.12453900 | 3.51151400  |
| H | -1.17704500 | -0.68103600 | 0.14024400  |
| H | -0.15354500 | -4.07593300 | 2.62924200  |
| C | 0.43507400  | -2.89920800 | 0.22622200  |
| C | 1.13024800  | -4.14208500 | 0.37455000  |
| C | 1.03943800  | -1.94110700 | -0.64491000 |
| C | 2.31566700  | -4.43193600 | -0.24235400 |
| H | 0.70608300  | -4.88470200 | 1.04363000  |
| C | 2.20677900  | -2.15656600 | -1.32503100 |
| H | 0.55668400  | -0.97639900 | -0.74626900 |
| C | 2.90023800  | -3.44686600 | -1.17314800 |
| O | 3.93689800  | -3.70517900 | -1.81496800 |
| O | -2.12980400 | -0.54273600 | 4.49950000  |
| C | 3.08900500  | -5.72399500 | 0.03321100  |
| C | 3.17761600  | -6.57200600 | -1.24751600 |
| C | 4.50642600  | -5.38956700 | 0.53660800  |
| C | 2.41201000  | -6.56966200 | 1.11497100  |
| H | 3.70045000  | -6.02813900 | -2.03548000 |
| H | 3.71382600  | -7.50517300 | -1.04153900 |
| H | 2.17326000  | -6.83133700 | -1.60635000 |
| H | 4.45338900  | -4.80301300 | 1.45999600  |

|   |             |             |             |
|---|-------------|-------------|-------------|
| H | 5.04252300  | -6.31926000 | 0.75727600  |
| H | 5.06768300  | -4.82610100 | -0.20703700 |
| H | 3.01778800  | -7.46044700 | 1.30850500  |
| H | 2.31400900  | -6.01930900 | 2.05794600  |
| H | 1.42506900  | -6.91370400 | 0.79616700  |
| C | 2.84904400  | -1.07385600 | -2.19782300 |
| C | 4.24868000  | -0.73293500 | -1.65179600 |
| C | 2.97957400  | -1.56692400 | -3.65104600 |
| C | 2.02969400  | 0.22198300  | -2.20301500 |
| H | 4.17115300  | -0.33616500 | -0.63423000 |
| H | 4.88915000  | -1.61446900 | -1.63922900 |
| H | 4.71348900  | 0.03467800  | -2.28055400 |
| H | 2.00021600  | -1.83167200 | -4.07205000 |
| H | 3.39964400  | -0.77305900 | -4.27897900 |
| H | 3.62383600  | -2.44472100 | -3.70249000 |
| H | 2.52926500  | 0.95885900  | -2.83961500 |
| H | 1.02048500  | 0.07185900  | -2.59898200 |
| H | 1.94590500  | 0.65064200  | -1.19873200 |
| C | -2.28620100 | 0.92409200  | 2.02912500  |
| C | -1.51805900 | 1.92807000  | 2.90780000  |
| C | -2.21348100 | 1.42051000  | 0.57931100  |
| C | -3.76981300 | 0.89530000  | 2.44021600  |
| H | -1.57534200 | 1.65545800  | 3.96140900  |
| H | -0.46510100 | 1.96802100  | 2.60972500  |
| H | -1.94510200 | 2.92871900  | 2.77986100  |
| H | -2.76252800 | 0.76498300  | -0.10592300 |
| H | -2.66045300 | 2.41727300  | 0.51925800  |
| H | -1.17930400 | 1.49728000  | 0.22524000  |
| H | -4.20550000 | 1.89268500  | 2.31663200  |
| H | -4.32879500 | 0.20087400  | 1.80384800  |
| H | -3.88551600 | 0.59069300  | 3.48032600  |
| C | -1.12991700 | -3.19043100 | 4.99625000  |
| C | -0.29161300 | -2.38081800 | 6.00210800  |
| C | -2.57734800 | -3.32059900 | 5.50541000  |
| C | -0.53669300 | -4.60300900 | 4.92166300  |
| H | 0.73911500  | -2.28077300 | 5.64651900  |
| H | -0.71085000 | -1.38592000 | 6.15038600  |
| H | -0.26939400 | -2.90114500 | 6.96584500  |
| H | -3.17618500 | -3.91724200 | 4.80897800  |
| H | -2.57967100 | -3.82944200 | 6.47557700  |
| H | -3.04255700 | -2.34216300 | 5.62143500  |
| H | -0.58487100 | -5.06356400 | 5.91277400  |
| H | -1.09803500 | -5.24191400 | 4.22952600  |
| H | 0.51331800  | -4.59115500 | 4.61028700  |

**M3<sup>SET</sup>**

|   |             |             |             |
|---|-------------|-------------|-------------|
| C | 0.01507700  | 0.63589000  | -0.65635300 |
| C | 1.21411300  | 0.37321300  | -2.47616700 |
| C | 2.38584000  | 1.66945700  | -0.73953100 |
| H | 2.05123300  | 2.38325800  | 0.01161400  |
| N | 0.11772700  | -0.28213000 | -2.71028900 |
| N | -0.61807500 | -0.13987100 | -1.56977000 |
| N | 1.20734300  | 0.95173800  | -1.23835700 |
| C | 2.36924500  | 0.68043300  | -3.37072600 |
| H | 2.09661000  | 0.50730100  | -4.41108100 |
| H | 3.23862700  | 0.05866300  | -3.11807000 |
| C | 3.12525000  | 2.40958600  | -1.92208800 |
| O | 2.63257500  | 2.06023800  | -3.20264700 |
| C | 4.66544300  | 0.92039200  | -0.77495500 |
| C | 3.41598700  | 0.70202300  | -0.19520900 |
| C | 3.21348200  | -0.30807100 | 0.73430400  |
| C | 4.31373200  | -1.09147600 | 1.05482700  |
| C | 5.57589900  | -0.89962600 | 0.49854200  |
| C | 5.75369200  | 0.12167000  | -0.42680400 |
| C | 4.62332800  | 2.06536100  | -1.74915400 |
| H | 2.25540000  | -0.48804900 | 1.20626900  |
| H | 6.39249400  | -1.54762800 | 0.79078800  |
| H | 6.72691400  | 0.28433400  | -0.87696100 |
| H | 5.06896500  | 1.81896500  | -2.71756600 |
| H | 5.16885100  | 2.92707000  | -1.35265300 |
| C | -1.83671600 | -0.88423100 | -1.41815200 |
| C | -1.88784100 | -1.90349500 | -0.46421400 |
| C | -2.91778500 | -0.54436200 | -2.23862900 |
| C | -3.10845300 | -2.55933800 | -0.30269100 |
| C | -4.10896900 | -1.23514700 | -2.03964700 |
| C | -4.22836300 | -2.23029900 | -1.06555600 |
| H | -3.18022600 | -3.35290500 | 0.43650000  |
| H | -4.96923200 | -0.98358200 | -2.65450900 |
| C | -2.80495300 | 0.53707900  | -3.28042000 |
| H | -2.18519400 | 0.20753900  | -4.11888500 |
| H | -2.33817800 | 1.44243100  | -2.87724600 |
| H | -3.79183600 | 0.80073300  | -3.66280100 |
| C | -5.54837300 | -2.91703000 | -0.83563500 |
| H | -5.41222900 | -3.88983500 | -0.35934100 |
| H | -6.08675000 | -3.06055600 | -1.77521200 |
| H | -6.18130200 | -2.30905700 | -0.18101400 |
| C | -0.69385800 | -2.28874400 | 0.36996000  |
| H | 0.24167600  | -2.19536300 | -0.18932400 |
| H | -0.78802400 | -3.32336600 | 0.70307200  |

|                         |              |              |             |
|-------------------------|--------------|--------------|-------------|
| H                       | -0.61417900  | -1.66228200  | 1.26567300  |
| H                       | 2.94817500   | 3.48178200   | -1.84569500 |
| N                       | 4.13080000   | -2.17719700  | 2.02669200  |
| O                       | 5.10411600   | -2.84559800  | 2.32362500  |
| O                       | 3.01267900   | -2.34936700  | 2.48119900  |
| C                       | -3.37966600  | 0.98631100   | 2.64985400  |
| C                       | -3.97677500  | 1.25402200   | 1.38951900  |
| C                       | -5.37626100  | 1.41091700   | 1.30453000  |
| C                       | -6.12304000  | 1.28517300   | 2.45575000  |
| C                       | -5.50681800  | 1.01011200   | 3.69965600  |
| C                       | -4.13782600  | 0.85737600   | 3.81901800  |
| C                       | -1.74395900  | 1.03884600   | 1.10986100  |
| C                       | -2.93281400  | 1.29710600   | 0.43248900  |
| H                       | -5.84566800  | 1.61686900   | 0.34810300  |
| H                       | -7.20098600  | 1.39685100   | 2.41565900  |
| H                       | -6.12715500  | 0.91878200   | 4.58511000  |
| H                       | -3.67115900  | 0.64924000   | 4.77535600  |
| N                       | -2.02248800  | 0.89227100   | 2.46253600  |
| H                       | -1.37533600  | 0.52008200   | 3.14370000  |
| H                       | -3.02240400  | 1.53588200   | -0.61646400 |
| C                       | -0.40477400  | 1.00398700   | 0.64901300  |
| H                       | 0.34981100   | 1.89696000   | 2.17693400  |
| O                       | 0.61658100   | 1.24337300   | 1.51179700  |
| <b>M3<sup>HAT</sup></b> |              |              |             |
| C                       | -4.37089300  | -9.83115600  | 0.31622000  |
| C                       | -5.02865200  | -11.59000800 | 1.48866000  |
| C                       | -6.27812700  | -9.53146900  | 2.01934300  |
| H                       | -5.97814200  | -8.49076800  | 2.12815900  |
| N                       | -4.17049500  | -12.08101500 | 0.65474700  |
| N                       | -3.76495700  | -10.99568900 | -0.09702700 |
| N                       | -5.18775100  | -10.24025000 | 1.35267400  |
| C                       | -5.80641700  | -12.26881700 | 2.56727500  |
| H                       | -5.29721300  | -13.17635900 | 2.89109100  |
| H                       | -6.81043200  | -12.53565100 | 2.20600900  |
| C                       | -6.60706300  | -10.19697800 | 3.40819100  |
| O                       | -5.86539500  | -11.37808800 | 3.66420100  |
| C                       | -8.58537500  | -10.21103400 | 1.98967900  |
| C                       | -7.55602800  | -9.66886100  | 1.22252700  |
| C                       | -7.72853100  | -9.36713000  | -0.12133000 |
| C                       | -8.97380700  | -9.64809500  | -0.66624500 |
| C                       | -10.02816600 | -10.18382800 | 0.07053100  |
| C                       | -9.83182700  | -10.46562100 | 1.41712700  |
| C                       | -8.13704800  | -10.44544900 | 3.40781200  |
| H                       | -6.93808400  | -8.92088500  | -0.71465200 |

|   |              |              |             |
|---|--------------|--------------|-------------|
| H | -10.97545700 | -10.37618900 | -0.41733800 |
| H | -10.63818100 | -10.88905700 | 2.00666100  |
| H | -8.35852600  | -11.45644000 | 3.76407900  |
| H | -8.63697300  | -9.74995800  | 4.08886700  |
| C | -3.03996100  | -11.21277400 | -1.30784700 |
| C | -3.65548900  | -10.93853000 | -2.53303900 |
| C | -1.71248200  | -11.65145300 | -1.21256300 |
| C | -2.86635000  | -11.03402700 | -3.68181600 |
| C | -0.97640500  | -11.75124000 | -2.38839600 |
| C | -1.52687500  | -11.41163100 | -3.62758200 |
| H | -3.31699400  | -10.80234900 | -4.64410100 |
| H | 0.06220500   | -12.06975400 | -2.33467200 |
| C | -1.09634600  | -11.96744300 | 0.12472500  |
| H | -0.01644800  | -12.09251600 | 0.02970100  |
| H | -1.51794300  | -12.88496300 | 0.54498800  |
| H | -1.29280600  | -11.17560300 | 0.85630500  |
| C | -0.67048300  | -11.40835200 | -4.86577600 |
| H | -1.27683400  | -11.48130700 | -5.77121800 |
| H | 0.04640300   | -12.23312700 | -4.85768900 |
| H | -0.10180200  | -10.47248700 | -4.91621600 |
| C | -5.10980000  | -10.55520200 | -2.63699200 |
| H | -5.70752100  | -11.01565500 | -1.84438700 |
| H | -5.51348200  | -10.87677600 | -3.59929400 |
| H | -5.24064800  | -9.47004000  | -2.56903600 |
| H | -6.31732000  | -9.52003100  | 4.21140900  |
| N | -9.18309400  | -9.37441800  | -2.09249100 |
| O | -10.30642300 | -9.51907700  | -2.54355600 |
| O | -8.22011200  | -9.02256300  | -2.75253000 |
| C | -1.18034700  | -8.10911900  | -2.07839700 |
| C | -2.05548300  | -7.34650100  | -2.89401300 |
| C | -1.55553500  | -6.79508500  | -4.08768500 |
| C | -0.23329800  | -7.01718200  | -4.42856100 |
| C | 0.61678200   | -7.78119900  | -3.60000500 |
| C | 0.15824600   | -8.33517500  | -2.41668000 |
| C | -3.21058300  | -8.12142900  | -1.11591200 |
| C | -3.33468700  | -7.35831900  | -2.25249100 |
| H | -2.20243700  | -6.20746300  | -4.73216900 |
| H | 0.16179400   | -6.60020100  | -5.34933900 |
| H | 1.64846300   | -7.93945700  | -3.89809000 |
| H | 0.80251000   | -8.93333900  | -1.77975400 |
| N | -1.90235000  | -8.54263800  | -0.99645400 |
| H | -1.54132400  | -9.10734300  | -0.24329000 |
| H | -4.25322000  | -6.90522400  | -2.59665100 |
| C | -4.27944800  | -8.49169200  | -0.16699400 |

|                   |             |             |             |
|-------------------|-------------|-------------|-------------|
| O                 | -5.16603900 | -7.64636700 | 0.15566100  |
| <b>DQ·radical</b> |             |             |             |
| C                 | 2.83921100  | 1.23725800  | 0.19923300  |
| C                 | 1.46825200  | 1.19479000  | 0.18849500  |
| C                 | 0.71865800  | -0.00001500 | -0.00004700 |
| C                 | 1.46824800  | -1.19480000 | -0.18873400 |
| C                 | 2.83920800  | -1.23722600 | -0.19973900 |
| C                 | 3.60175400  | 0.00002600  | -0.00031900 |
| H                 | 0.91847000  | 2.10874900  | 0.37681000  |
| H                 | 0.91845300  | -2.10877300 | -0.37694800 |
| C                 | -0.71865300 | -0.00002600 | 0.00008200  |
| C                 | -1.46822500 | -1.19478700 | 0.18899100  |
| C                 | -1.46826500 | 1.19473200  | -0.18869000 |
| C                 | -2.83918400 | -1.23723400 | 0.19999100  |
| H                 | -0.91841500 | -2.10871400 | 0.37738300  |
| C                 | -2.83922500 | 1.23717500  | -0.19944700 |
| H                 | -0.91849400 | 2.10866200  | -0.37717400 |
| C                 | -3.60174900 | -0.00003200 | 0.00032800  |
| O                 | 4.86018800  | 0.00004200  | -0.00043200 |
| O                 | -4.86018300 | -0.00003800 | 0.00042400  |
| C                 | 3.59977300  | -2.54782300 | -0.42566900 |
| C                 | 4.48597700  | -2.43693200 | -1.67975600 |
| C                 | 4.47625700  | -2.85839800 | 0.80176000  |
| C                 | 2.65527800  | -3.73811000 | -0.63177900 |
| H                 | 3.86988500  | -2.24001600 | -2.56392200 |
| H                 | 5.21054100  | -1.63083500 | -1.56834900 |
| H                 | 5.02093000  | -3.37986900 | -1.84307200 |
| H                 | 3.85189800  | -2.98060300 | 1.69362100  |
| H                 | 5.02481600  | -3.79404800 | 0.64147800  |
| H                 | 5.18884500  | -2.05290300 | 0.97737400  |
| H                 | 3.24940700  | -4.64608200 | -0.77758500 |
| H                 | 2.00638900  | -3.89979000 | 0.23566500  |
| H                 | 2.02272500  | -3.60822100 | -1.51631600 |
| C                 | 3.59977600  | 2.54788500  | 0.42498300  |
| C                 | 4.48622700  | 2.43706200  | 1.67890100  |
| C                 | 4.47601100  | 2.85844700  | -0.80262800 |
| C                 | 2.65528400  | 3.73814900  | 0.63123900  |
| H                 | 3.87031600  | 2.24014800  | 2.56319400  |
| H                 | 5.21079900  | 1.63099000  | 1.56737700  |
| H                 | 5.02117600  | 3.38002300  | 1.84208600  |
| H                 | 3.85146900  | 2.98060800  | -1.69436800 |
| H                 | 5.02458000  | 3.79411500  | -0.64248400 |
| H                 | 5.18858000  | 2.05296100  | -0.97835600 |
| H                 | 3.24941400  | 4.64614700  | 0.77688800  |

|   |             |             |             |
|---|-------------|-------------|-------------|
| H | 2.00621000  | 3.89977700  | -0.23607600 |
| H | 2.02291900  | 3.60827500  | 1.51591200  |
| C | -3.59980700 | 2.54774800  | -0.42545600 |
| C | -4.47610000 | 2.85851500  | 0.80206200  |
| C | -2.65532900 | 3.73799600  | -0.63188300 |
| C | -4.48620000 | 2.43668700  | -1.67939200 |
| H | -5.18865600 | 2.05304400  | 0.97790900  |
| H | -3.85159800 | 2.98085700  | 1.69380500  |
| H | -5.02468400 | 3.79414000  | 0.64172200  |
| H | -2.02293300 | 3.60798500  | -1.51651400 |
| H | -3.24947200 | 4.64595700  | -0.77770600 |
| H | -2.00628600 | 3.89978200  | 0.23542500  |
| H | -5.02115100 | 3.37961400  | -1.84277500 |
| H | -3.87025000 | 2.23961200  | -2.56362000 |
| H | -5.21077300 | 1.63063200  | -1.56775300 |
| C | -3.59972800 | -2.54780100 | 0.42616300  |
| C | -4.48591800 | -2.43670000 | 1.68024000  |
| C | -4.47622400 | -2.85861200 | -0.80120000 |
| C | -2.65521300 | -3.73803800 | 0.63247500  |
| H | -3.86982100 | -2.23959400 | 2.56436000  |
| H | -5.21051100 | -1.63064900 | 1.56869200  |
| H | -5.02083900 | -3.37962200 | 1.84374300  |
| H | -3.85187300 | -2.98097700 | -1.69304500 |
| H | -5.02477300 | -3.79423700 | -0.64073700 |
| H | -5.18882000 | -2.05315500 | -0.97695200 |
| H | -3.24932800 | -4.64599400 | 0.77844400  |
| H | -2.00632700 | -3.89986200 | -0.23494400 |
| H | -2.02265800 | -3.60798600 | 1.51698600  |

**DQH·radical**

|   |             |             |             |
|---|-------------|-------------|-------------|
| C | 2.85049500  | -1.22804300 | -0.31958600 |
| C | 1.47882500  | -1.17982500 | -0.30706200 |
| C | 0.75915900  | -0.00019100 | 0.00098900  |
| C | 1.48081800  | 1.17812000  | 0.30939100  |
| C | 2.85253100  | 1.22432300  | 0.32150800  |
| C | 3.60267800  | -0.00238200 | 0.00076200  |
| H | 0.90958800  | -2.06081400 | -0.57693000 |
| H | 0.91295800  | 2.06009600  | 0.57865300  |
| C | -0.70844600 | 0.00238100  | -0.00055200 |
| C | -1.42771500 | 1.16630900  | -0.30491700 |
| C | -1.43189800 | -1.15661000 | 0.30276000  |
| C | -2.81661000 | 1.20656300  | -0.31944000 |
| H | -0.87320400 | 2.05620700  | -0.57279200 |
| C | -2.82335700 | -1.18907600 | 0.31296700  |
| H | -0.88216000 | -2.04846500 | 0.57349000  |



|   |             |             |             |
|---|-------------|-------------|-------------|
| C | -3.50137800 | 0.00989000  | -0.00568100 |
| O | 4.85252700  | -0.00330900 | 0.00025700  |
| O | -4.86106500 | 0.07610500  | -0.02810600 |
| C | 3.61576300  | 2.50165700  | 0.66825100  |
| C | 4.49021700  | 2.27120800  | 1.91527100  |
| C | 4.50014300  | 2.92029800  | -0.52253800 |
| C | 2.66454600  | 3.66546100  | 0.97441500  |
| H | 3.87110000  | 1.97554200  | 2.76851200  |
| H | 5.23663100  | 1.49806600  | 1.73649300  |
| H | 5.00316400  | 3.20311400  | 2.17609400  |
| H | 3.88579800  | 3.10318100  | -1.41030200 |
| H | 5.02443700  | 3.84987100  | -0.27635100 |
| H | 5.23670300  | 2.15158800  | -0.75454200 |
| H | 3.25613300  | 4.55574100  | 1.20633100  |
| H | 2.02348700  | 3.90447800  | 0.11953100  |
| H | 2.02782800  | 3.45458000  | 1.83966400  |
| C | 3.61197200  | -2.50595600 | -0.66805300 |
| C | 4.48467900  | -2.27547200 | -1.91632300 |
| C | 4.49787800  | -2.92634100 | 0.52095900  |
| C | 2.65917900  | -3.66859100 | -0.97363400 |
| H | 3.86452500  | -1.97834900 | -2.76830000 |
| H | 5.23221200  | -1.50329900 | -1.73808600 |
| H | 4.99621500  | -3.20770400 | -2.17876300 |
| H | 3.88487800  | -3.10923000 | 1.40966200  |
| H | 5.02089400  | -3.85623100 | 0.27325200  |
| H | 5.23554300  | -2.15849400 | 0.75224600  |
| H | 3.24951500  | -4.55939900 | -1.20669300 |
| H | 2.01892800  | -3.90726100 | -0.11802700 |
| H | 2.02169300  | -3.45655000 | -1.83803300 |
| C | -3.58079300 | -2.48240700 | 0.66503600  |
| C | -4.43451500 | -2.95489300 | -0.53255300 |
| C | -2.61592500 | -3.63564500 | 0.97849000  |
| C | -4.43684600 | -2.28754500 | 1.93534900  |
| H | -5.16927900 | -2.22905200 | -0.89141600 |
| H | -3.78313300 | -3.18579400 | -1.38017700 |
| H | -4.97881900 | -3.86437800 | -0.26093100 |
| H | -1.98313500 | -3.41060400 | 1.84184200  |
| H | -3.19843100 | -4.53015600 | 1.21587800  |
| H | -1.97445000 | -3.87195200 | 0.12433500  |
| H | -4.96881100 | -3.21545000 | 2.16603900  |
| H | -3.78869200 | -2.04470600 | 2.78209300  |
| H | -5.18346100 | -1.49115600 | 1.87333000  |
| C | -3.57170700 | 2.49943400  | -0.66747900 |
| C | -4.43875400 | 2.29523000  | -1.92332100 |

|            |             |             |             |
|------------|-------------|-------------|-------------|
| C          | -4.44787900 | 2.94060000  | 0.52029600  |
| C          | -2.60329800 | 3.65199500  | -0.96846300 |
| H          | -3.81462200 | 2.00059500  | -2.77303900 |
| H          | -5.20279700 | 1.53351400  | -1.77143100 |
| H          | -4.93589000 | 3.23699700  | -2.17945200 |
| H          | -3.82789400 | 3.11572600  | 1.40550400  |
| H          | -4.95392300 | 3.87937800  | 0.27086700  |
| H          | -5.20463200 | 2.19595000  | 0.76600200  |
| H          | -3.18427500 | 4.54866200  | -1.20219400 |
| H          | -1.96376500 | 3.88431400  | -0.11077100 |
| H          | -1.96576900 | 3.43513900  | -1.83139500 |
| H          | -5.24381800 | -0.77614800 | 0.20019400  |
| <b>TS4</b> |             |             |             |
| C          | 0.49475300  | -0.14908000 | 0.16749700  |
| C          | 1.67576400  | -0.69744000 | 1.91109900  |
| C          | 2.62894300  | -1.50783000 | -0.22447400 |
| H          | 2.19796400  | -1.83667400 | -1.17336800 |
| N          | 0.74046400  | 0.08790100  | 2.36847600  |
| N          | 0.01606100  | 0.43052900  | 1.26994400  |
| N          | 1.56828400  | -0.85350900 | 0.55672400  |
| C          | 2.73497600  | -1.49355600 | 2.60378500  |
| H          | 2.46009700  | -1.66970700 | 3.64309600  |
| H          | 3.70020100  | -0.97073800 | 2.57046100  |
| C          | 3.24179600  | -2.70433000 | 0.59996500  |
| O          | 2.77961400  | -2.74468200 | 1.94160100  |
| C          | 4.98244600  | -1.11411700 | 0.02352300  |
| C          | 3.78435800  | -0.54782700 | -0.40809600 |
| C          | 3.72022200  | 0.75204400  | -0.88776600 |
| C          | 4.90966700  | 1.46485200  | -0.90963600 |
| C          | 6.12794100  | 0.93097100  | -0.49720300 |
| C          | 6.16477100  | -0.37644600 | -0.02645900 |
| C          | 4.77424200  | -2.52405300 | 0.50627300  |
| H          | 2.79869400  | 1.19868900  | -1.24195100 |
| H          | 7.02012400  | 1.54318000  | -0.53854300 |
| H          | 7.10142300  | -0.80688800 | 0.31066500  |
| H          | 5.23751800  | -2.71993400 | 1.47750000  |
| H          | 5.19716300  | -3.23960100 | -0.20505100 |
| C          | -0.97996600 | 1.47865700  | 1.33821200  |
| C          | -0.67269400 | 2.69689700  | 0.72508200  |
| C          | -2.18096100 | 1.23734300  | 2.01501100  |
| C          | -1.65556700 | 3.68693000  | 0.75808900  |
| C          | -3.12224300 | 2.26108100  | 2.01503000  |
| C          | -2.88654800 | 3.48171000  | 1.37741500  |
| H          | -1.44607000 | 4.64334600  | 0.28651700  |

|   |             |             |             |
|---|-------------|-------------|-------------|
| H | -4.07321600 | 2.09393000  | 2.51399900  |
| C | -2.47090900 | -0.07903000 | 2.67924700  |
| H | -1.66452700 | -0.38180000 | 3.35280400  |
| H | -2.58859100 | -0.85610500 | 1.91701500  |
| H | -3.39762100 | -0.01887000 | 3.25171000  |
| C | -3.95570600 | 4.54024500  | 1.35237600  |
| H | -3.55969000 | 5.49942300  | 1.01403600  |
| H | -4.40000700 | 4.67523200  | 2.34176500  |
| H | -4.75575800 | 4.23991600  | 0.66825100  |
| C | 0.65186700  | 2.96658100  | 0.05444800  |
| H | 1.48412400  | 2.47077100  | 0.56430100  |
| H | 0.85784900  | 4.03790200  | 0.05719600  |
| H | 0.65254300  | 2.64412100  | -0.99344700 |
| H | 2.91767500  | -3.65440500 | 0.17551700  |
| N | 4.86843500  | 2.85683200  | -1.37751300 |
| O | 5.92494000  | 3.45152200  | -1.48611500 |
| O | 3.77593000  | 3.33865100  | -1.62359800 |
| C | -3.46252700 | 0.09078900  | -0.69449000 |
| C | -3.36174700 | 1.21932400  | -1.56333600 |
| C | -4.46263400 | 2.08844200  | -1.72460800 |
| C | -5.62458700 | 1.81588600  | -1.03744500 |
| C | -5.72054400 | 0.68650600  | -0.18467000 |
| C | -4.66438800 | -0.18194300 | -0.00907900 |
| C | -1.40584200 | 0.15997200  | -1.41705000 |
| C | -2.03007400 | 1.22845800  | -2.04708800 |
| H | -4.38679900 | 2.95737900  | -2.37136600 |
| H | -6.48194500 | 2.47314200  | -1.14018400 |
| H | -6.64772700 | 0.51177200  | 0.35219200  |
| H | -4.74117800 | -1.02484400 | 0.67203700  |
| N | -2.25916700 | -0.55338600 | -0.59791500 |
| H | -2.13535600 | -1.87271700 | -0.57423600 |
| H | -1.54903900 | 1.96963400  | -2.67101400 |
| C | 0.02691600  | 0.04899800  | -1.26475800 |
| O | 0.89181800  | 0.19744600  | -2.11242400 |
| N | -2.01650900 | -3.13395500 | -0.64006200 |
| C | -0.72229700 | -3.50445200 | -0.01239500 |
| C | -0.62814200 | -3.14977200 | 1.46319100  |
| H | 0.05825200  | -2.97168900 | -0.56364700 |
| H | -0.55317500 | -4.57788900 | -0.16876100 |
| H | 0.39747000  | -3.32047700 | 1.80172900  |
| H | -0.87636200 | -2.09677600 | 1.62968900  |
| H | -1.29028000 | -3.75754800 | 2.08209900  |
| C | -3.16065600 | -3.70676500 | 0.12673400  |
| C | -4.49733800 | -3.62642300 | -0.59822600 |

|   |             |             |             |
|---|-------------|-------------|-------------|
| H | -3.21484100 | -3.15135800 | 1.06822400  |
| H | -2.92415400 | -4.75040300 | 0.37135200  |
| H | -5.29092000 | -3.86089800 | 0.11452600  |
| H | -4.68697100 | -2.62488100 | -0.99323200 |
| H | -4.56309300 | -4.34312900 | -1.41838300 |
| C | -2.05887800 | -3.55176000 | -2.07076300 |
| C | -0.85613100 | -3.11175100 | -2.89263500 |
| H | -2.96198500 | -3.11242100 | -2.49763100 |
| H | -2.16462100 | -4.64380700 | -2.10487200 |
| H | -1.06387500 | -3.33182900 | -3.94172900 |
| H | -0.68232300 | -2.03495200 | -2.81369800 |
| H | 0.05762300  | -3.64441500 | -2.62210000 |

**M4**

|   |             |             |             |
|---|-------------|-------------|-------------|
| C | 0.43725700  | -0.15269300 | 0.23667500  |
| C | 1.64595500  | -0.73169100 | 1.95332700  |
| C | 2.54993600  | -1.53116900 | -0.20567800 |
| H | 2.10308900  | -1.83496000 | -1.15515000 |
| N | 0.72885100  | 0.05839200  | 2.43621700  |
| N | -0.01219200 | 0.42086500  | 1.35342600  |
| N | 1.51042200  | -0.87290800 | 0.59973400  |
| C | 2.70959800  | -1.54752600 | 2.61543100  |
| H | 2.45711300  | -1.72784600 | 3.65937800  |
| H | 3.68104000  | -1.03860400 | 2.56255200  |
| C | 3.15266600  | -2.75030000 | 0.59053300  |
| O | 2.72148900  | -2.79431100 | 1.94264400  |
| C | 4.91474000  | -1.18901100 | 0.00553200  |
| C | 3.72061400  | -0.58917600 | -0.39135500 |
| C | 3.67501400  | 0.72155100  | -0.84356000 |
| C | 4.87957300  | 1.40862800  | -0.87392700 |
| C | 6.09374500  | 0.84095700  | -0.49555300 |
| C | 6.11159000  | -0.47642300 | -0.05222100 |
| C | 4.68603700  | -2.60401500 | 0.46328600  |
| H | 2.75567600  | 1.19352200  | -1.16970300 |
| H | 6.99768400  | 1.43488200  | -0.54380100 |
| H | 7.04486700  | -0.93424700 | 0.25642900  |
| H | 5.16789400  | -2.83275900 | 1.41790400  |
| H | 5.07401800  | -3.31275600 | -0.27437900 |
| C | -0.99719600 | 1.47456500  | 1.45359500  |
| C | -0.70644000 | 2.69109300  | 0.83059800  |
| C | -2.17590800 | 1.23637900  | 2.16909100  |
| C | -1.68326400 | 3.68651800  | 0.90062900  |
| C | -3.10931300 | 2.26579700  | 2.20867700  |
| C | -2.89089800 | 3.48718000  | 1.56485400  |
| H | -1.48579300 | 4.64233800  | 0.42299600  |

|   |             |             |             |
|---|-------------|-------------|-------------|
| H | -4.04166700 | 2.10290000  | 2.74301100  |
| C | -2.45575900 | -0.08837200 | 2.82004100  |
| H | -1.63163700 | -0.41217600 | 3.46115700  |
| H | -2.60342400 | -0.84182000 | 2.03953000  |
| H | -3.36292300 | -0.03110300 | 3.42348800  |
| C | -3.95511500 | 4.55184200  | 1.57738500  |
| H | -3.54892900 | 5.52411200  | 1.29272900  |
| H | -4.41307000 | 4.64022800  | 2.56545500  |
| H | -4.74836300 | 4.29593300  | 0.86778300  |
| C | 0.59482600  | 2.95809300  | 0.11491000  |
| H | 1.44089100  | 2.45276700  | 0.59139800  |
| H | 0.80752700  | 4.02806600  | 0.11817900  |
| H | 0.55255100  | 2.64142500  | -0.93318200 |
| H | 2.79931800  | -3.68910500 | 0.16441100  |
| N | 4.86193400  | 2.80942700  | -1.31661100 |
| O | 5.92946400  | 3.38417900  | -1.42651700 |
| O | 3.77750900  | 3.31789800  | -1.54275900 |
| C | -3.52325000 | 0.08283800  | -0.71651000 |
| C | -3.45582400 | 1.02620300  | -1.79724200 |
| C | -4.61647400 | 1.73664500  | -2.19061800 |
| C | -5.79284700 | 1.50413100  | -1.51962900 |
| C | -5.85422000 | 0.57268900  | -0.44468600 |
| C | -4.74844200 | -0.13826000 | -0.04047300 |
| C | -1.46164700 | 0.14877100  | -1.35059500 |
| C | -2.10965100 | 1.03714100  | -2.21434400 |
| H | -4.57142800 | 2.45407600  | -3.00450400 |
| H | -6.69319900 | 2.03984700  | -1.80203900 |
| H | -6.79824000 | 0.43318300  | 0.07297800  |
| H | -4.80007600 | -0.82724200 | 0.79876600  |
| N | -2.30679900 | -0.45699600 | -0.44523000 |
| H | -2.23231600 | -2.12049900 | -0.50407200 |
| H | -1.64057700 | 1.65615100  | -2.96681700 |
| C | -0.03803200 | 0.05547300  | -1.19108500 |
| O | 0.83547600  | 0.19472100  | -2.03838300 |
| N | -2.12568600 | -3.19631700 | -0.59861800 |
| C | -0.78682200 | -3.53141100 | -0.02238100 |
| C | -0.66814600 | -3.22712700 | 1.46141200  |
| H | -0.06203200 | -2.93464600 | -0.58106500 |
| H | -0.58771900 | -4.58573000 | -0.23828800 |
| H | 0.37545900  | -3.35912800 | 1.75987600  |
| H | -0.96071000 | -2.19314100 | 1.67194800  |
| H | -1.27586300 | -3.89252300 | 2.07606200  |
| C | -3.23744900 | -3.82994000 | 0.18737300  |
| C | -4.60503600 | -3.68620400 | -0.46110400 |

|   |             |             |             |
|---|-------------|-------------|-------------|
| H | -3.23323800 | -3.34688300 | 1.16619600  |
| H | -2.97438300 | -4.88406600 | 0.32387500  |
| H | -5.35667400 | -4.00340100 | 0.26429400  |
| H | -4.81730800 | -2.64813600 | -0.73072900 |
| H | -4.71194500 | -4.31362100 | -1.34698000 |
| C | -2.21139600 | -3.54873600 | -2.05658600 |
| C | -1.03110800 | -3.07556300 | -2.88929400 |
| H | -3.12854700 | -3.08854900 | -2.42514100 |
| H | -2.32172200 | -4.63617700 | -2.11458400 |
| H | -1.26640000 | -3.27129900 | -3.93717500 |
| H | -0.86624000 | -2.00012300 | -2.78539500 |
| H | -0.10882200 | -3.61025800 | -2.65495200 |

**TS5(R)**

|   |            |             |             |
|---|------------|-------------|-------------|
| C | 1.89281700 | 1.37068100  | 0.24316400  |
| C | 3.68443300 | 0.59482900  | 1.21362600  |
| C | 1.69449700 | -0.64467000 | 1.85647400  |
| H | 0.61047700 | -0.52812500 | 1.80834600  |
| N | 4.11432800 | 1.53549400  | 0.41986200  |
| N | 2.98750800 | 1.99802900  | -0.18652700 |
| N | 2.33140400 | 0.44239000  | 1.11194100  |
| C | 4.36659400 | -0.16937400 | 2.30492600  |
| H | 5.30721800 | 0.31767200  | 2.56053300  |
| H | 4.56725700 | -1.20397200 | 2.00561100  |
| C | 2.20090900 | -0.61292100 | 3.32909400  |
| O | 3.52050700 | -0.08163200 | 3.44155800  |
| C | 2.34830600 | -2.84746800 | 2.47878800  |
| C | 2.12475300 | -2.01946800 | 1.37481200  |
| C | 2.28639500 | -2.48038100 | 0.07658700  |
| C | 2.66702000 | -3.81008200 | -0.06403200 |
| C | 2.87246800 | -4.66962600 | 1.01134600  |
| C | 2.71120600 | -4.17991500 | 2.30277200  |
| C | 2.14152800 | -2.08666100 | 3.76370800  |
| H | 2.10107600 | -1.85552800 | -0.78727000 |
| H | 3.16406200 | -5.69548700 | 0.82605100  |
| H | 2.88245400 | -4.82574300 | 3.15705700  |
| H | 2.89356800 | -2.29964500 | 4.52626200  |
| H | 1.15574600 | -2.31222800 | 4.18653300  |
| C | 3.08922100 | 3.01974700  | -1.19752900 |
| C | 2.86550500 | 2.64822400  | -2.52642000 |
| C | 3.44049300 | 4.30796000  | -0.79579200 |
| C | 3.01263900 | 3.64483400  | -3.48695600 |
| C | 3.57207000 | 5.26655700  | -1.79989700 |
| C | 3.36182000 | 4.95380200  | -3.14324600 |

|   |              |              |              |
|---|--------------|--------------|--------------|
| H | 2. 84945900  | 3. 39258300  | -4. 53141400 |
| H | 3. 84258500  | 6. 28171900  | -1. 52218800 |
| C | 3. 65768000  | 4. 64789400  | 0. 65476100  |
| H | 4. 55439500  | 4. 15837600  | 1. 04457900  |
| H | 2. 81162600  | 4. 32109500  | 1. 26808500  |
| H | 3. 77114500  | 5. 72546900  | 0. 77852200  |
| C | 3. 48187000  | 6. 01246200  | -4. 20788900 |
| H | 4. 08349900  | 6. 85528900  | -3. 86219200 |
| H | 2. 49288300  | 6. 39508000  | -4. 47894300 |
| H | 3. 93718300  | 5. 60784900  | -5. 11477000 |
| C | 2. 47545800  | 1. 24202700  | -2. 89512300 |
| H | 3. 15587800  | 0. 51028300  | -2. 44704800 |
| H | 2. 50640300  | 1. 11396900  | -3. 97790600 |
| H | 1. 46145900  | 1. 01014100  | -2. 54973000 |
| H | 1. 57172400  | 0. 03728400  | 3. 93942300  |
| N | 2. 86338900  | -4. 33443400 | -1. 42215100 |
| O | 3. 14192000  | -5. 51500800 | -1. 54223700 |
| O | 2. 74125700  | -3. 55987700 | -2. 35417800 |
| C | -2. 07053800 | 0. 32461300  | 2. 06777300  |
| C | -1. 43816900 | 1. 15645700  | 3. 04334100  |
| C | -1. 88388700 | 1. 14090200  | 4. 37990000  |
| C | -2. 92198900 | 0. 29983600  | 4. 72673700  |
| C | -3. 53521500 | -0. 53040500 | 3. 75999500  |
| C | -3. 12751800 | -0. 53187500 | 2. 43980800  |
| C | -0. 48909900 | 1. 42474000  | 1. 04207600  |
| C | -0. 39974600 | 1. 85096700  | 2. 35512000  |
| H | -1. 41729100 | 1. 78407400  | 5. 12093600  |
| H | -3. 27778500 | 0. 27362300  | 5. 75194900  |
| H | -4. 34923900 | -1. 18202100 | 4. 06281100  |
| H | -3. 61481500 | -1. 17051800 | 1. 71049900  |
| N | -1. 48774900 | 0. 51839800  | 0. 83701000  |
| H | 0. 30074300  | 2. 57052200  | 2. 75936600  |
| C | 0. 46144400  | 1. 80819600  | -0. 03096700 |
| O | 0. 23952100  | 2. 52169200  | -0. 97535000 |
| C | -2. 99863900 | -1. 89041300 | -0. 72047300 |
| C | -1. 71343500 | -1. 92471400 | -0. 16333500 |
| C | -1. 34585100 | -2. 94012800 | 0. 69835900  |
| C | -2. 28687800 | -3. 92736900 | 1. 01072700  |
| C | -3. 56544900 | -3. 87832800 | 0. 45809500  |
| C | -3. 94565800 | -2. 85898600 | -0. 42261600 |
| C | -1. 98055900 | -0. 04665300 | -1. 63567300 |
| C | -0. 98162500 | -0. 71545700 | -0. 65296900 |
| H | -0. 34824400 | -2. 96303900 | 1. 12797500  |
| H | -2. 02345300 | -4. 73213700 | 1. 68807100  |

|   |             |             |             |
|---|-------------|-------------|-------------|
| H | -4.28735100 | -4.64729700 | 0.71349300  |
| H | -4.94611400 | -2.82016000 | -0.84022400 |
| N | -3.14300400 | -0.78194200 | -1.56833800 |
| O | -1.78074500 | 0.91073300  | -2.34953900 |
| C | -4.37231800 | -0.41403200 | -2.23594000 |
| H | -4.71062600 | -1.24038100 | -2.87152100 |
| H | -4.11525400 | 0.42569400  | -2.88896800 |
| C | -5.46292800 | -0.02595800 | -1.25651800 |
| C | -6.79523800 | -0.34028800 | -1.52543200 |
| C | -5.14384100 | 0.65442700  | -0.07966200 |
| C | -7.80017800 | 0.02785500  | -0.63330200 |
| H | -7.04686000 | -0.87995700 | -2.43512700 |
| C | -6.14617600 | 1.01168700  | 0.81801100  |
| H | -4.10474100 | 0.89018500  | 0.14029700  |
| C | -7.47700600 | 0.70241200  | 0.54200900  |
| H | -8.83354200 | -0.22223900 | -0.85159100 |
| H | -5.88289900 | 1.52633300  | 1.73691600  |
| H | -8.25788300 | 0.98009900  | 1.24260000  |
| O | 0.24700400  | -0.57501300 | -0.77731800 |

#### TS5(S)

|   |             |             |             |
|---|-------------|-------------|-------------|
| C | -1.35207900 | 0.47272700  | -0.18533200 |
| C | -1.95796000 | -0.87312400 | -1.77524200 |
| C | -2.44800700 | -1.71203000 | 0.49206200  |
| H | -1.94889000 | -1.55332800 | 1.44915000  |
| N | -1.44551900 | 0.15570200  | -2.38969600 |
| N | -1.07382400 | 0.99096400  | -1.37983200 |
| N | -1.94307600 | -0.69839700 | -0.42366000 |
| C | -2.40501800 | -2.20959500 | -2.26896000 |
| H | -2.05910200 | -2.37195400 | -3.28907000 |
| H | -3.50016500 | -2.29061600 | -2.24122000 |
| C | -2.14168100 | -3.14800900 | -0.06723400 |
| O | -1.77738700 | -3.16905900 | -1.43929300 |
| C | -4.51038400 | -2.92527400 | 0.40982600  |
| C | -3.95547900 | -1.65783900 | 0.58417300  |
| C | -4.74173300 | -0.53651000 | 0.80093600  |
| C | -6.11545500 | -0.74038900 | 0.82815100  |
| C | -6.70597700 | -1.99077000 | 0.66020400  |
| C | -5.89243800 | -3.09850300 | 0.45120300  |
| C | -3.43270100 | -3.95661700 | 0.20063400  |
| H | -4.31350900 | 0.44906200  | 0.94972100  |
| H | -7.78461400 | -2.07818800 | 0.69067800  |
| H | -6.33417300 | -4.07960700 | 0.31397200  |
| H | -3.63678200 | -4.63384600 | -0.63311500 |



|   |             |             |             |
|---|-------------|-------------|-------------|
| H | -3.31694200 | -4.56912500 | 1.10088500  |
| C | -0.55856900 | 2.31340600  | -1.64075800 |
| C | -1.39554200 | 3.39816400  | -1.36249000 |
| C | 0.74645900  | 2.45734400  | -2.12531600 |
| C | -0.86292100 | 4.67649600  | -1.52656500 |
| C | 1.22486100  | 3.75721800  | -2.26958900 |
| C | 0.44951700  | 4.87314700  | -1.95229500 |
| H | -1.49095500 | 5.53626200  | -1.30758000 |
| H | 2.24361900  | 3.89794400  | -2.62378900 |
| C | 1.63402200  | 1.28865000  | -2.45516200 |
| H | 1.06735400  | 0.39428400  | -2.71405100 |
| H | 2.25899300  | 1.04800200  | -1.58829700 |
| H | 2.29270600  | 1.54910100  | -3.28676600 |
| C | 1.03594700  | 6.25575200  | -2.05885100 |
| H | 0.27067600  | 7.02464300  | -1.93685100 |
| H | 1.52589200  | 6.40301400  | -3.02502400 |
| H | 1.79285000  | 6.40033600  | -1.28110600 |
| C | -2.81543800 | 3.21964900  | -0.88575800 |
| H | -3.29100400 | 2.34277800  | -1.33491300 |
| H | -3.40885000 | 4.09698900  | -1.14810800 |
| H | -2.86263400 | 3.10495300  | 0.20263500  |
| H | -1.27713700 | -3.56386300 | 0.45044400  |
| N | -6.98691500 | 0.42205100  | 1.03816700  |
| O | -8.19011900 | 0.23243400  | 1.08383000  |
| O | -6.45983400 | 1.51471900  | 1.15279500  |
| C | 2.16516100  | 2.25862900  | 0.91181600  |
| C | 1.57819200  | 3.47649900  | 1.37667300  |
| C | 2.34317800  | 4.65737000  | 1.42635900  |
| C | 3.66740800  | 4.60918200  | 1.03894800  |
| C | 4.24890300  | 3.39586200  | 0.60287000  |
| C | 3.52286500  | 2.22162800  | 0.53921300  |
| C | 0.06730200  | 1.83765000  | 1.34354900  |
| C | 0.21959700  | 3.17183800  | 1.67144700  |
| H | 1.89321000  | 5.58918300  | 1.75806200  |
| H | 4.27393800  | 5.50889300  | 1.06529200  |
| H | 5.29312000  | 3.38978400  | 0.30478400  |
| H | 3.98299400  | 1.30325000  | 0.18969400  |
| N | 1.21895700  | 1.26863600  | 0.86759400  |
| H | -0.56796400 | 3.84730400  | 1.97759300  |
| C | -1.20900800 | 1.16203100  | 1.15980800  |
| O | -2.20334400 | 1.22530400  | 1.85786500  |
| C | 3.53754100  | -1.05416400 | 1.08222600  |
| C | 2.56488300  | -0.67213200 | 2.01149500  |
| C | 2.90328000  | -0.43318900 | 3.32852100  |

|   |             |              |              |
|---|-------------|--------------|--------------|
| C | 4. 24178600 | -0. 57595600 | 3. 71015000  |
| C | 5. 20294300 | -0. 95556000 | 2. 77556300  |
| C | 4. 86762700 | -1. 20530500 | 1. 43947900  |
| C | 1. 59382900 | -1. 09549200 | -0. 13254300 |
| C | 1. 24629500 | -0. 60958900 | 1. 29738300  |
| H | 2. 13924800 | -0. 13667400 | 4. 04090600  |
| H | 4. 53429800 | -0. 39234900 | 4. 73830400  |
| H | 6. 23674600 | -1. 06575000 | 3. 08678000  |
| H | 5. 61917300 | -1. 51467800 | 0. 72086500  |
| N | 2. 95759700 | -1. 22681400 | -0. 19278300 |
| O | 0. 81073600 | -1. 36253000 | -1. 02588200 |
| C | 3. 67039500 | -1. 68311700 | -1. 37151400 |
| H | 4. 54891900 | -1. 04576000 | -1. 52313700 |
| H | 2. 98673200 | -1. 52540700 | -2. 21145800 |
| C | 4. 07493900 | -3. 13918700 | -1. 28223300 |
| C | 5. 40438600 | -3. 52658400 | -1. 43588600 |
| C | 3. 09925700 | -4. 11234700 | -1. 04735300 |
| C | 5. 76145200 | -4. 87190400 | -1. 35346500 |
| H | 6. 16590000 | -2. 77254100 | -1. 62011600 |
| C | 3. 45411600 | -5. 45407000 | -0. 96317100 |
| H | 2. 06032900 | -3. 80868200 | -0. 93894900 |
| C | 4. 78727300 | -5. 83639500 | -1. 11504600 |
| H | 6. 80024200 | -5. 16327000 | -1. 47117600 |
| H | 2. 69117300 | -6. 20461700 | -0. 78282000 |
| H | 5. 06336000 | -6. 88380200 | -1. 04822000 |
| O | 0. 13224600 | -0. 87198100 | 1. 79519800  |

### 5(R)

|   |              |              |              |
|---|--------------|--------------|--------------|
| C | -1. 00248300 | 0. 32306600  | -0. 39734400 |
| C | -1. 40046300 | -1. 01519800 | -2. 07540300 |
| C | -1. 13996200 | -2. 18248600 | 0. 07936700  |
| H | -0. 54129200 | -1. 98956200 | 0. 96918300  |
| N | -1. 51955000 | 0. 17809000  | -2. 57461300 |
| N | -1. 28908600 | 1. 00319200  | -1. 50390500 |
| N | -1. 10581600 | -0. 97073900 | -0. 74196600 |
| C | -1. 44329400 | -2. 36326600 | -2. 71773200 |
| H | -1. 22897000 | -2. 28378100 | -3. 78301200 |
| H | -2. 42891000 | -2. 82995500 | -2. 58470300 |
| C | -0. 60019400 | -3. 41147700 | -0. 73836100 |
| O | -0. 41231400 | -3. 12924700 | -2. 11841700 |
| C | -2. 85245600 | -3. 86524600 | 0. 04376600  |
| C | -2. 57381400 | -2. 54638000 | 0. 39643600  |
| C | -3. 54061200 | -1. 70607500 | 0. 93140000  |
| C | -4. 80977700 | -2. 24863500 | 1. 08054400  |

|   |             |             |             |
|---|-------------|-------------|-------------|
| C | -5.12755600 | -3.56338200 | 0.74375300  |
| C | -4.13442900 | -4.38397300 | 0.22251400  |
| C | -1.62820800 | -4.54505700 | -0.50938200 |
| H | -3.29958000 | -0.68741800 | 1.23038900  |
| H | -6.13936900 | -3.92118800 | 0.88641200  |
| H | -4.36282800 | -5.40867900 | -0.05053800 |
| H | -1.81736100 | -5.08160900 | -1.44404100 |
| H | -1.23668900 | -5.27230100 | 0.20884500  |
| C | -1.55628300 | 2.41330700  | -1.62483900 |
| C | -2.80076700 | 2.86382700  | -1.18008900 |
| C | -0.57982100 | 3.24962600  | -2.16785000 |
| C | -3.05490600 | 4.23220400  | -1.28736900 |
| C | -0.88498500 | 4.60437300  | -2.25754600 |
| C | -2.11021700 | 5.11237300  | -1.81645100 |
| H | -4.01343000 | 4.61547700  | -0.94729100 |
| H | -0.14098700 | 5.28418400  | -2.66573800 |
| C | 0.77126600  | 2.71759300  | -2.55135000 |
| H | 0.69613300  | 1.77357400  | -3.09582400 |
| H | 1.35938500  | 2.51550700  | -1.64853600 |
| H | 1.31073400  | 3.44418200  | -3.16121500 |
| C | -2.38818000 | 6.59137700  | -1.89064400 |
| H | -3.45402400 | 6.80143600  | -1.78246600 |
| H | -2.04573700 | 7.00835600  | -2.84101500 |
| H | -1.85915100 | 7.12026200  | -1.09125200 |
| C | -3.80367600 | 1.91791700  | -0.57295100 |
| H | -3.95473700 | 1.03691600  | -1.20642700 |
| H | -4.76688600 | 2.41235700  | -0.43937800 |
| H | -3.44878100 | 1.56967000  | 0.40409900  |
| H | 0.39395600  | -3.68623800 | -0.38524800 |
| N | -5.87507200 | -1.38720500 | 1.60879400  |
| O | -6.96946000 | -1.88822900 | 1.80574000  |
| O | -5.61103400 | -0.21581700 | 1.81519800  |
| C | 2.16253000  | 2.99761900  | 1.03791600  |
| C | 1.21761300  | 4.05896100  | 0.95285700  |
| C | 1.69580600  | 5.37714400  | 0.86726300  |
| C | 3.06230500  | 5.59840000  | 0.87731100  |
| C | 3.97627800  | 4.52895000  | 0.97358300  |
| C | 3.54480500  | 3.21549200  | 1.05566000  |
| C | 0.08913200  | 2.12523400  | 1.02387100  |
| C | -0.09786400 | 3.47556800  | 0.96035700  |
| H | 0.99844600  | 6.20642200  | 0.79122900  |
| H | 3.44277000  | 6.61246300  | 0.80941800  |
| H | 5.04078700  | 4.73948800  | 0.98143300  |
| H | 4.24631000  | 2.39010500  | 1.12973400  |

|   |              |              |              |
|---|--------------|--------------|--------------|
| N | 1. 42799400  | 1. 83886400  | 1. 08692500  |
| H | -1. 04325300 | 3. 99259500  | 0. 87221800  |
| C | -0. 72551400 | 0. 83945700  | 1. 04438300  |
| O | -1. 74626500 | 0. 71757200  | 1. 78741300  |
| C | 3. 79815400  | -0. 63724300 | 1. 37898700  |
| C | 2. 79504600  | 0. 01013900  | 2. 10617900  |
| C | 2. 90483400  | 0. 18413300  | 3. 47102100  |
| C | 4. 04739600  | -0. 30645300 | 4. 11293000  |
| C | 5. 03894700  | -0. 95571800 | 3. 38099500  |
| C | 4. 93280000  | -1. 13615500 | 1. 99699200  |
| C | 2. 23987200  | -0. 10869900 | -0. 20987600 |
| C | 1. 69639200  | 0. 41570000  | 1. 15871900  |
| H | 2. 11791200  | 0. 68975000  | 4. 02234900  |
| H | 4. 16132700  | -0. 18399000 | 5. 18421100  |
| H | 5. 91768700  | -1. 33552900 | 3. 89201600  |
| H | 5. 70764800  | -1. 65206000 | 1. 44093400  |
| N | 3. 46334600  | -0. 66837700 | 0. 00871300  |
| O | 1. 65929700  | -0. 03660500 | -1. 27828600 |
| C | 4. 26801300  | -1. 25730300 | -1. 05223800 |
| H | 5. 32055700  | -1. 05189400 | -0. 83791500 |
| H | 3. 99619300  | -0. 72336300 | -1. 96686400 |
| C | 4. 02353500  | -2. 74044600 | -1. 21941500 |
| C | 5. 00971100  | -3. 67602300 | -0. 91357700 |
| C | 2. 78435900  | -3. 17932300 | -1. 69775300 |
| C | 4. 76441200  | -5. 03909400 | -1. 08040200 |
| H | 5. 97853400  | -3. 34001200 | -0. 55191500 |
| C | 2. 54002200  | -4. 53840400 | -1. 86594300 |
| H | 2. 01155300  | -2. 45328100 | -1. 94250300 |
| C | 3. 53005100  | -5. 47157000 | -1. 55605600 |
| H | 5. 53921900  | -5. 76030500 | -0. 84081300 |
| H | 1. 57590600  | -4. 86210100 | -2. 24853300 |
| H | 3. 34048300  | -6. 53172400 | -1. 69025100 |
| O | 0. 45302200  | -0. 13462100 | 1. 45266200  |

**5(S)**

|   |             |              |             |
|---|-------------|--------------|-------------|
| C | 1. 29824600 | 0. 09493200  | 0. 21882700 |
| C | 2. 26697200 | -0. 36622800 | 2. 12953700 |
| C | 1. 57464600 | -2. 36990100 | 0. 87875800 |
| H | 0. 74708600 | -2. 58104400 | 0. 20371300 |
| N | 2. 32817700 | 0. 92772200  | 2. 03606600 |
| N | 1. 73249000 | 1. 19646300  | 0. 83280100 |
| N | 1. 64453600 | -0. 91449700 | 1. 03964900 |
| C | 2. 62454100 | -1. 28767900 | 3. 24965500 |
| H | 2. 71370600 | -0. 73220500 | 4. 18268600 |
| H | 3. 57220600 | -1. 80518900 | 3. 04792900 |

|   |              |              |              |
|---|--------------|--------------|--------------|
| C | 1. 37953200  | -3. 07145700 | 2. 27281600  |
| O | 1. 53991300  | -2. 18954800 | 3. 37317900  |
| C | 3. 36228700  | -3. 93733300 | 1. 16395700  |
| C | 2. 89375900  | -2. 89683200 | 0. 36476900  |
| C | 3. 60090900  | -2. 42841900 | -0. 73435200 |
| C | 4. 81116200  | -3. 05916900 | -0. 99278800 |
| C | 5. 31088700  | -4. 10841000 | -0. 22342700 |
| C | 4. 57631700  | -4. 55480000 | 0. 86871300  |
| C | 2. 40352800  | -4. 23278400 | 2. 28710800  |
| H | 3. 21981300  | -1. 62079300 | -1. 36008300 |
| H | 6. 26392400  | -4. 55186700 | -0. 48296100 |
| H | 4. 95315700  | -5. 36410700 | 1. 48487700  |
| H | 2. 89206900  | -4. 29785400 | 3. 26401800  |
| H | 1. 89620100  | -5. 18731000 | 2. 11593000  |
| C | 1. 69849600  | 2. 55309700  | 0. 35115900  |
| C | 2. 69514100  | 2. 95298900  | -0. 53676800 |
| C | 0. 66933400  | 3. 38768100  | 0. 79372900  |
| C | 2. 62636600  | 4. 26589300  | -1. 00997200 |
| C | 0. 65112500  | 4. 68673300  | 0. 30014600  |
| C | 1. 61610300  | 5. 13861600  | -0. 60657500 |
| H | 3. 38305100  | 4. 61041800  | -1. 70989000 |
| H | -0. 14601400 | 5. 35710000  | 0. 61203900  |
| C | -0. 41263600 | 2. 86571300  | 1. 69806400  |
| H | 0. 00436600  | 2. 39110600  | 2. 59163900  |
| H | -1. 01896500 | 2. 11850800  | 1. 17057000  |
| H | -1. 07539800 | 3. 67346800  | 2. 01164000  |
| C | 1. 55378900  | 6. 54932000  | -1. 13183000 |
| H | 2. 32601800  | 6. 72783900  | -1. 88221500 |
| H | 1. 68990800  | 7. 27178200  | -0. 32171200 |
| H | 0. 57932500  | 6. 74955600  | -1. 58666000 |
| C | 3. 77660700  | 2. 00087700  | -0. 97346000 |
| H | 4. 29002600  | 1. 57071300  | -0. 10701600 |
| H | 4. 51501700  | 2. 51742100  | -1. 58817500 |
| H | 3. 34266600  | 1. 17712100  | -1. 55206200 |
| H | 0. 35339200  | -3. 42936400 | 2. 36426300  |
| N | 5. 61192000  | -2. 58325200 | -2. 12828000 |
| O | 6. 62543100  | -3. 20018500 | -2. 41018700 |
| O | 5. 22304000  | -1. 59412500 | -2. 72307200 |
| C | -2. 53912200 | 1. 52659900  | -1. 07470900 |
| C | -1. 90658800 | 2. 65283800  | -1. 66820000 |
| C | -2. 67621400 | 3. 80376700  | -1. 90141800 |
| C | -4. 02156900 | 3. 79107700  | -1. 56991400 |
| C | -4. 62557600 | 2. 65353400  | -0. 99750900 |
| C | -3. 89403800 | 1. 50624200  | -0. 73403900 |

|               |             |             |             |
|---------------|-------------|-------------|-------------|
| C             | -0.37221600 | 1.03778900  | -1.42295900 |
| C             | -0.52320200 | 2.30924500  | -1.88926600 |
| H             | -2.22095900 | 4.68723200  | -2.33943300 |
| H             | -4.62567700 | 4.67405400  | -1.75196400 |
| H             | -5.68165000 | 2.67832900  | -0.74795000 |
| H             | -4.35131500 | 0.63411600  | -0.27446500 |
| N             | -1.56150000 | 0.57480100  | -0.91643400 |
| H             | 0.25457900  | 2.94935200  | -2.28196800 |
| C             | 0.69564100  | -0.02700500 | -1.22927400 |
| O             | 1.61274500  | -0.23443200 | -2.07711000 |
| C             | -3.05555600 | -2.19542600 | 0.55464600  |
| C             | -1.99512000 | -1.29465400 | 0.69855800  |
| C             | -1.50594600 | -0.98348100 | 1.95433100  |
| C             | -2.07972800 | -1.59872200 | 3.07295000  |
| C             | -3.13589300 | -2.49288000 | 2.91421800  |
| C             | -3.64967500 | -2.80210600 | 1.65032500  |
| C             | -2.59183800 | -1.57159400 | -1.60288800 |
| C             | -1.55724400 | -0.85256600 | -0.68150200 |
| H             | -0.70025500 | -0.26461800 | 2.07865700  |
| H             | -1.70189800 | -1.37427000 | 4.06414800  |
| H             | -3.57874000 | -2.95777000 | 3.78890600  |
| H             | -4.48280600 | -3.48703400 | 1.53829900  |
| N             | -3.37671500 | -2.36202400 | -0.80588800 |
| O             | -2.67508700 | -1.44134200 | -2.80386800 |
| C             | -4.50130500 | -3.13418400 | -1.30839500 |
| H             | -4.49477900 | -4.12019700 | -0.83377500 |
| H             | -4.31700400 | -3.26832400 | -2.37760400 |
| C             | -5.81838500 | -2.42613200 | -1.07362900 |
| C             | -6.82132400 | -2.99827300 | -0.29434700 |
| C             | -6.02532700 | -1.16498700 | -1.64142200 |
| C             | -8.01861000 | -2.31712100 | -0.07564100 |
| H             | -6.66973600 | -3.98276000 | 0.14192200  |
| C             | -7.21543700 | -0.48134700 | -1.41829100 |
| H             | -5.24600200 | -0.72330500 | -2.25913400 |
| C             | -8.21508400 | -1.05726900 | -0.63315600 |
| H             | -8.79363900 | -2.77023600 | 0.53411700  |
| H             | -7.36519700 | 0.49813400  | -1.86190600 |
| H             | -9.14483000 | -0.52528500 | -0.45943600 |
| O             | -0.26628300 | -1.24610100 | -1.04225600 |
| <b>TS6(R)</b> |             |             |             |
| C             | -0.98041100 | 0.11152000  | -0.41636100 |
| C             | -1.04781800 | -1.10948000 | -2.26413500 |
| C             | -1.07192400 | -2.38994500 | -0.14478700 |
| H             | -0.51781100 | -2.23810400 | 0.78355000  |

|   |             |             |             |
|---|-------------|-------------|-------------|
| N | -1.07797500 | 0.11525400  | -2.69412600 |
| N | -1.04732700 | 0.85071100  | -1.52942600 |
| N | -0.99770300 | -1.14791900 | -0.89979100 |
| C | -0.98481000 | -2.41128600 | -2.99170600 |
| H | -0.59563600 | -2.27326500 | -4.00002400 |
| H | -1.98070100 | -2.87288400 | -3.05469300 |
| C | -0.49381000 | -3.59433300 | -0.97518300 |
| O | -0.07620200 | -3.24004800 | -2.28441800 |
| C | -2.81676000 | -4.02684500 | -0.38534500 |
| C | -2.51515800 | -2.75833700 | 0.10331700  |
| C | -3.47553100 | -1.95021400 | 0.69554700  |
| C | -4.76040400 | -2.47089800 | 0.76780900  |
| C | -5.10054000 | -3.73751500 | 0.29481100  |
| C | -4.11569900 | -4.52623400 | -0.28689400 |
| C | -1.59886800 | -4.68290200 | -0.97999000 |
| H | -3.23061200 | -0.96925100 | 1.09544600  |
| H | -6.12314600 | -4.08209800 | 0.38216900  |
| H | -4.36299200 | -5.51199900 | -0.66655100 |
| H | -1.76957700 | -5.04899000 | -1.99762200 |
| H | -1.29094700 | -5.54407200 | -0.37931200 |
| C | -1.17417000 | 2.27896700  | -1.57166200 |
| C | -2.30246900 | 2.85338000  | -0.97847400 |
| C | -0.15770200 | 3.04257600  | -2.15658400 |
| C | -2.39621500 | 4.24598200  | -0.98257000 |
| C | -0.29789100 | 4.42739600  | -2.12994800 |
| C | -1.40389400 | 5.04620900  | -1.54618900 |
| H | -3.26060400 | 4.71354900  | -0.51705100 |
| H | 0.49504700  | 5.04066600  | -2.55250500 |
| C | 1.05044900  | 2.40323200  | -2.78414500 |
| H | 0.81008400  | 2.00322100  | -3.77448300 |
| H | 1.40887300  | 1.56891800  | -2.17780400 |
| H | 1.84962300  | 3.13953400  | -2.89230800 |
| C | -1.50298900 | 6.54928700  | -1.52311500 |
| H | -2.32288000 | 6.88469000  | -0.88446400 |
| H | -1.67238200 | 6.94721600  | -2.52853100 |
| H | -0.57238400 | 6.98870300  | -1.15089300 |
| C | -3.35078300 | 2.01465800  | -0.29366600 |
| H | -3.64620300 | 1.15577300  | -0.90478400 |
| H | -4.24003900 | 2.61217800  | -0.08466600 |
| H | -2.97214400 | 1.61899900  | 0.65697900  |
| H | 0.41743900  | -3.95572800 | -0.49754400 |
| N | -5.81411200 | -1.64001700 | 1.36232600  |
| O | -6.92214400 | -2.13110400 | 1.49771300  |
| O | -5.52678400 | -0.50015900 | 1.68397200  |

|   |              |              |              |
|---|--------------|--------------|--------------|
| C | 1. 78880500  | 2. 93658300  | 0. 72725600  |
| C | 0. 77597100  | 3. 86428500  | 1. 09325900  |
| C | 1. 03475600  | 5. 23558300  | 0. 94388100  |
| C | 2. 26544900  | 5. 63550800  | 0. 45184500  |
| C | 3. 25707200  | 4. 69413000  | 0. 10691900  |
| C | 3. 03777100  | 3. 33267500  | 0. 24145200  |
| C | -0. 02138400 | 1. 80311800  | 1. 41564000  |
| C | -0. 36858300 | 3. 11303100  | 1. 54532300  |
| H | 0. 27319900  | 5. 96620000  | 1. 20136300  |
| H | 2. 47594800  | 6. 69290600  | 0. 32728800  |
| H | 4. 21211900  | 5. 04395900  | -0. 27118500 |
| H | 3. 79673200  | 2. 60341100  | -0. 02678800 |
| N | 1. 25418300  | 1. 68404900  | 0. 91978700  |
| H | -1. 32163800 | 3. 50206600  | 1. 87145700  |
| C | -0. 55603600 | 0. 42217900  | 1. 56621900  |
| O | -1. 49501400 | 0. 02625900  | 2. 23681600  |
| C | 3. 99295500  | -0. 41118700 | 1. 37537500  |
| C | 2. 94009000  | 0. 22267300  | 2. 03738400  |
| C | 3. 06137300  | 0. 62643500  | 3. 35166400  |
| C | 4. 26956300  | 0. 37850500  | 4. 01159900  |
| C | 5. 31234600  | -0. 26307900 | 3. 34655400  |
| C | 5. 19443100  | -0. 67179000 | 2. 01337600  |
| C | 2. 34407400  | -0. 29651100 | -0. 21570000 |
| C | 1. 77109100  | 0. 34056400  | 1. 09293000  |
| H | 2. 23504900  | 1. 12248300  | 3. 85284000  |
| H | 4. 39500500  | 0. 68356100  | 5. 04427600  |
| H | 6. 24294700  | -0. 45341100 | 3. 87102400  |
| H | 6. 01438800  | -1. 17111200 | 1. 50987900  |
| N | 3. 62584600  | -0. 68602100 | 0. 04200900  |
| O | 1. 75483500  | -0. 44185800 | -1. 26833800 |
| C | 4. 43904100  | -1. 38175700 | -0. 94866200 |
| H | 5. 48600500  | -1. 12588200 | -0. 76649300 |
| H | 4. 15168800  | -0. 97354200 | -1. 92109600 |
| C | 4. 22806000  | -2. 87981300 | -0. 92481400 |
| C | 5. 16040800  | -3. 72830200 | -0. 32877500 |
| C | 3. 07396400  | -3. 42266800 | -1. 49932200 |
| C | 4. 94515300  | -5. 10556800 | -0. 30241700 |
| H | 6. 06586800  | -3. 31451400 | 0. 10791300  |
| C | 2. 86227700  | -4. 79794800 | -1. 47712600 |
| H | 2. 33805700  | -2. 76795600 | -1. 95922300 |
| C | 3. 79644100  | -5. 64233400 | -0. 87703700 |
| H | 5. 67767400  | -5. 75799600 | 0. 16186700  |
| H | 1. 96761000  | -5. 20660000 | -1. 93913600 |
| H | 3. 63159200  | -6. 71490900 | -0. 86229000 |



|               |             |             |             |
|---------------|-------------|-------------|-------------|
| O             | 0.64563900  | -0.38967000 | 1.53749300  |
| <b>TS6(S)</b> |             |             |             |
| C             | 1.33533300  | 0.16124700  | 0.39184000  |
| C             | 2.31266800  | -0.24508100 | 2.34694000  |
| C             | 1.56569300  | -2.26160000 | 1.14138600  |
| H             | 0.71361400  | -2.45801000 | 0.48934600  |
| N             | 2.37462300  | 1.04551100  | 2.22244200  |
| N             | 1.77518400  | 1.26670800  | 1.00181000  |
| N             | 1.69429400  | -0.81293700 | 1.26353200  |
| C             | 2.64605100  | -1.14362400 | 3.49159900  |
| H             | 2.74591600  | -0.57263500 | 4.41416200  |
| H             | 3.57960000  | -1.69323300 | 3.30765500  |
| C             | 1.37294300  | -2.92760800 | 2.55591200  |
| O             | 1.53891300  | -2.01927300 | 3.63316700  |
| C             | 3.29950200  | -3.89535200 | 1.42960500  |
| C             | 2.83544900  | -2.87729100 | 0.59953500  |
| C             | 3.50269400  | -2.51389500 | -0.56303800 |
| C             | 4.66635600  | -3.21730100 | -0.84841600 |
| C             | 5.16271900  | -4.23951100 | -0.04148800 |
| C             | 4.46867300  | -4.58457800 | 1.11150500  |
| C             | 2.38643400  | -4.09773900 | 2.60868200  |
| H             | 3.13184600  | -1.73300100 | -1.22526200 |
| H             | 6.07767800  | -4.74487000 | -0.32329900 |
| H             | 4.83972600  | -5.37608100 | 1.75384800  |
| H             | 2.91816600  | -4.09645700 | 3.56539000  |
| H             | 1.86748100  | -5.05805100 | 2.53153700  |
| C             | 1.68703800  | 2.60729700  | 0.49375800  |
| C             | 2.66841400  | 3.04037800  | -0.39730100 |
| C             | 0.59874900  | 3.39387600  | 0.87598000  |
| C             | 2.54456000  | 4.33549200  | -0.90366700 |
| C             | 0.51946200  | 4.67971600  | 0.34855000  |
| C             | 1.48326000  | 5.16598600  | -0.53882900 |
| H             | 3.29163100  | 4.69991700  | -1.60438800 |
| H             | -0.32737600 | 5.30693200  | 0.61675900  |
| C             | -0.48904600 | 2.82741700  | 1.74641800  |
| H             | -0.08258700 | 2.36317800  | 2.65006600  |
| H             | -1.04529700 | 2.05813300  | 1.19538800  |
| H             | -1.19625500 | 3.60532500  | 2.03909500  |
| C             | 1.37826800  | 6.56782000  | -1.08194300 |
| H             | 1.95054800  | 6.67884400  | -2.00530700 |
| H             | 1.76625900  | 7.29227800  | -0.35876100 |
| H             | 0.33738900  | 6.83239200  | -1.28512500 |
| C             | 3.77836500  | 2.11710000  | -0.82483100 |
| H             | 4.28294500  | 1.67973000  | 0.04230800  |

|   |              |              |              |
|---|--------------|--------------|--------------|
| H | 4. 51734300  | 2. 65356700  | -1. 42199200 |
| H | 3. 37233400  | 1. 29386200  | -1. 42432900 |
| H | 0. 34490900  | -3. 27805600 | 2. 65617300  |
| N | 5. 41309900  | -2. 86304800 | -2. 06218300 |
| O | 6. 41779200  | -3. 50396700 | -2. 32232100 |
| O | 4. 99074200  | -1. 94622700 | -2. 74349000 |
| C | -2. 44073900 | 1. 51947200  | -1. 10328500 |
| C | -1. 79131500 | 2. 66893500  | -1. 63318400 |
| C | -2. 52547000 | 3. 86179100  | -1. 73559300 |
| C | -3. 85285600 | 3. 86856500  | -1. 34060000 |
| C | -4. 47488500 | 2. 70834900  | -0. 83534600 |
| C | -3. 77997800 | 1. 51739400  | -0. 70205300 |
| C | -0. 30902600 | 0. 99744600  | -1. 58024100 |
| C | -0. 43055700 | 2. 30614300  | -1. 94072700 |
| H | -2. 05520700 | 4. 76155600  | -2. 12157100 |
| H | -4. 43003600 | 4. 78421000  | -1. 41773900 |
| H | -5. 51704200 | 2. 75048200  | -0. 53530500 |
| H | -4. 25020700 | 0. 62516800  | -0. 29768800 |
| N | -1. 48982400 | 0. 53092200  | -1. 06564500 |
| H | 0. 34996500  | 2. 95135000  | -2. 31803300 |
| C | 0. 67465800  | -0. 12309100 | -1. 50138500 |
| O | 1. 67351300  | -0. 29888400 | -2. 18334300 |
| C | -3. 00381400 | -2. 26210800 | 0. 30820500  |
| C | -1. 94963700 | -1. 36269700 | 0. 50249100  |
| C | -1. 53831400 | -1. 03212200 | 1. 78212900  |
| C | -2. 17073500 | -1. 64235100 | 2. 87081500  |
| C | -3. 21090200 | -2. 54523300 | 2. 66128500  |
| C | -3. 65462500 | -2. 86383900 | 1. 37405200  |
| C | -2. 46957400 | -1. 61456400 | -1. 82263900 |
| C | -1. 47739400 | -0. 89425000 | -0. 85434000 |
| H | -0. 74770100 | -0. 30575500 | 1. 94185400  |
| H | -1. 85241500 | -1. 40414500 | 3. 87961700  |
| H | -3. 69920000 | -3. 00609400 | 3. 51354500  |
| H | -4. 48173300 | -3. 54793700 | 1. 22071000  |
| N | -3. 27238700 | -2. 42105900 | -1. 06465400 |
| O | -2. 50771600 | -1. 46007900 | -3. 02214500 |
| C | -4. 39188100 | -3. 17206100 | -1. 61025800 |
| H | -4. 39882500 | -4. 17176600 | -1. 16566400 |
| H | -4. 18925100 | -3. 27607400 | -2. 67956900 |
| C | -5. 70865000 | -2. 46244800 | -1. 37617900 |
| C | -6. 74814200 | -3. 07641200 | -0. 68081800 |
| C | -5. 88066400 | -1. 16242100 | -1. 86099700 |
| C | -7. 94815100 | -2. 39911200 | -0. 46574200 |
| H | -6. 62176300 | -4. 08920500 | -0. 30584400 |

|             |             |             |             |
|-------------|-------------|-------------|-------------|
| C           | -7.07366800 | -0.48283100 | -1.64065000 |
| H           | -5.07457200 | -0.68624700 | -2.41544300 |
| C           | -8.11081500 | -1.10155300 | -0.94138900 |
| H           | -8.75190800 | -2.88535200 | 0.07758200  |
| H           | -7.19608200 | 0.52696900  | -2.01964000 |
| H           | -9.04287800 | -0.57288400 | -0.77019300 |
| O           | -0.16216300 | -1.27012400 | -1.20833100 |
| <b>P(R)</b> |             |             |             |
| C           | 4.59294500  | 3.65551700  | 3.13200300  |
| C           | 3.70023900  | 4.74811200  | 2.94076900  |
| C           | 4.22631500  | 6.05431400  | 2.95372100  |
| C           | 5.58344400  | 6.22374700  | 3.14151200  |
| C           | 6.44629300  | 5.11876100  | 3.32241700  |
| C           | 5.97054600  | 3.82185100  | 3.32337000  |
| C           | 2.51501100  | 2.85962900  | 2.86064100  |
| C           | 2.37682500  | 4.21730800  | 2.76819700  |
| H           | 3.57139100  | 6.90847500  | 2.81482200  |
| H           | 6.00243300  | 7.22430500  | 3.15088800  |
| H           | 7.50705300  | 5.29503600  | 3.46631700  |
| H           | 6.62768000  | 2.97055400  | 3.47003800  |
| N           | 3.82390800  | 2.52433800  | 3.10119300  |
| H           | 1.46251000  | 4.76642200  | 2.60275000  |
| C           | 1.77157700  | 1.59760000  | 2.79914200  |
| O           | 0.60809400  | 1.36357700  | 2.64447600  |
| C           | 5.94749300  | -0.18673500 | 3.41122800  |
| C           | 4.90710800  | 0.48058900  | 4.06400800  |
| C           | 4.82656400  | 0.50436500  | 5.44321100  |
| C           | 5.81230700  | -0.16682400 | 6.17267000  |
| C           | 6.84248400  | -0.83561600 | 5.51297300  |
| C           | 6.93156400  | -0.85895800 | 4.11717800  |
| C           | 4.72932100  | 0.69669500  | 1.68403100  |
| C           | 4.02856700  | 1.10027900  | 3.02109600  |
| H           | 4.01791000  | 1.03088900  | 5.94039400  |
| H           | 5.77551200  | -0.16862800 | 7.25594000  |
| H           | 7.59872500  | -1.35383100 | 6.09328100  |
| H           | 7.73148700  | -1.38789600 | 3.61097100  |
| N           | 5.82814200  | -0.04342900 | 2.01342100  |
| O           | 4.33226400  | 0.99870200  | 0.58276700  |
| C           | 6.71707000  | -0.65032600 | 1.04115900  |
| H           | 7.74069100  | -0.30743400 | 1.22702700  |
| H           | 6.40360500  | -0.25981500 | 0.06829000  |
| C           | 6.65531600  | -2.16425100 | 1.06189600  |
| C           | 7.81058800  | -2.91054400 | 0.82960500  |
| C           | 5.44657400  | -2.82565300 | 1.28467300  |

|   |             |              |             |
|---|-------------|--------------|-------------|
| C | 7. 75762800 | -4. 30249200 | 0. 80772800 |
| H | 8. 75632000 | -2. 40051000 | 0. 66483000 |
| C | 5. 39391200 | -4. 21620400 | 1. 26828700 |
| H | 4. 54403800 | -2. 25140100 | 1. 47804000 |
| C | 6. 54895800 | -4. 95798300 | 1. 02765900 |
| H | 8. 66259600 | -4. 87302900 | 0. 62520100 |
| H | 4. 44949200 | -4. 72074200 | 1. 44469300 |
| H | 6. 50724500 | -6. 04219100 | 1. 01628600 |
| O | 2. 69872400 | 0. 59120100  | 2. 99283800 |

**P(S)**

|   |              |              |              |
|---|--------------|--------------|--------------|
| C | -2. 52332400 | 1. 80339400  | -0. 40226800 |
| C | -2. 00016800 | 2. 98534000  | -0. 99910300 |
| C | -2. 85915800 | 4. 08912100  | -1. 16308800 |
| C | -4. 17374900 | 3. 97609000  | -0. 75606500 |
| C | -4. 66710300 | 2. 78492100  | -0. 17568700 |
| C | -3. 85448400 | 1. 68437400  | 0. 01788200  |
| C | -0. 37011000 | 1. 46241700  | -0. 92362700 |
| C | -0. 62164400 | 2. 74631900  | -1. 32536400 |
| H | -2. 49046900 | 5. 00787900  | -1. 60771800 |
| H | -4. 84816100 | 4. 81638400  | -0. 88187300 |
| H | -5. 70755600 | 2. 73474000  | 0. 12885200  |
| H | -4. 22804200 | 0. 77017200  | 0. 46959600  |
| N | -1. 48693900 | 0. 91294100  | -0. 34804300 |
| H | 0. 07295000  | 3. 42893500  | -1. 79064300 |
| C | 0. 65750300  | 0. 41602700  | -0. 90251700 |
| O | 1. 80128000  | 0. 41263300  | -1. 25396300 |
| C | -2. 85846500 | -1. 91273300 | 0. 95605400  |
| C | -1. 83252700 | -0. 99851900 | 1. 21117000  |
| C | -1. 48334300 | -0. 65406100 | 2. 50236500  |
| C | -2. 18129300 | -1. 25275500 | 3. 55559600  |
| C | -3. 20840100 | -2. 15733700 | 3. 29299800  |
| C | -3. 57109000 | -2. 50312200 | 1. 98665200  |
| C | -2. 15436100 | -1. 32044700 | -1. 14149200 |
| C | -1. 32056200 | -0. 50007300 | -0. 10601800 |
| H | -0. 68968500 | 0. 06321600  | 2. 68686000  |
| H | -1. 92824100 | -1. 00723900 | 4. 58063800  |
| H | -3. 74666900 | -2. 60702600 | 4. 12080300  |
| H | -4. 37986800 | -3. 19899700 | 1. 79459100  |
| N | -3. 01992000 | -2. 10075000 | -0. 43243900 |
| O | -2. 04990600 | -1. 22060900 | -2. 34294700 |
| C | -4. 06619900 | -2. 90446200 | -1. 04573000 |
| H | -4. 06331200 | -3. 89917100 | -0. 58977200 |
| H | -3. 78542200 | -3. 01057500 | -2. 09712200 |
| C | -5. 42247700 | -2. 24548000 | -0. 90801500 |

|   |             |             |             |
|---|-------------|-------------|-------------|
| C | -6.48333200 | -2.89985100 | -0.28515900 |
| C | -5.60982700 | -0.95187100 | -1.40306900 |
| C | -7.71975200 | -2.26852700 | -0.15284800 |
| H | -6.34402300 | -3.90728700 | 0.09937700  |
| C | -6.83943300 | -0.31736800 | -1.26428400 |
| H | -4.78676400 | -0.44055700 | -1.89831500 |
| C | -7.89796200 | -0.97640400 | -0.63796100 |
| H | -8.53940300 | -2.78495000 | 0.33602500  |
| H | -6.97181400 | 0.68919900  | -1.64852000 |
| H | -8.85832100 | -0.48293900 | -0.52957100 |
| O | 0.06549000  | -0.69971500 | -0.33818200 |

**Coordinates for different substituents at the IEFPCM(THF)//M062X/6-31G(d,p) level**

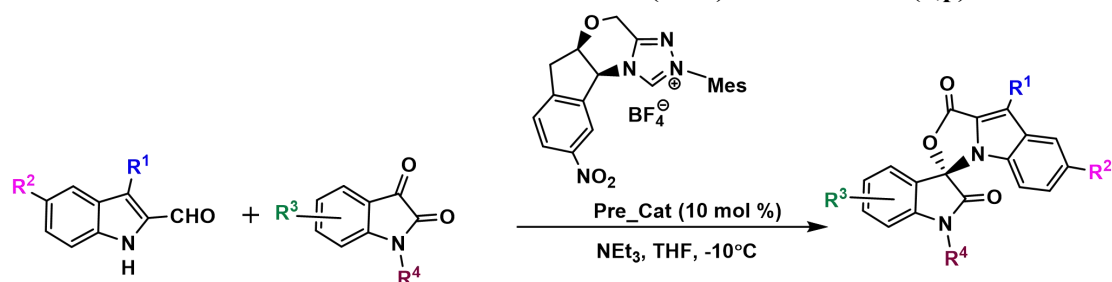

**H/H/5-MeO/Bn**

**TS5(R)**

|   |            |             |             |
|---|------------|-------------|-------------|
| C | 1.89367500 | 1.36547900  | 0.27202300  |
| C | 3.69800200 | 0.57674400  | 1.20716600  |
| C | 1.71818200 | -0.67172900 | 1.86314000  |
| H | 0.63350800 | -0.55465100 | 1.83134700  |
| N | 4.11775400 | 1.52389300  | 0.41557300  |
| N | 2.98272700 | 1.99405700  | -0.16915300 |
| N | 2.34327000 | 0.42724800  | 1.12481900  |
| C | 4.39582900 | -0.19996300 | 2.27957300  |
| H | 5.33976400 | 0.28520600  | 2.52740300  |
| H | 4.59295900 | -1.23101000 | 1.96530200  |
| C | 2.24532200 | -0.65841200 | 3.32871400  |
| O | 3.56569800 | -0.12617400 | 3.42897400  |
| C | 2.38311000 | -2.88111500 | 2.44877900  |
| C | 2.14301600 | -2.04032100 | 1.35818900  |
| C | 2.28669100 | -2.48728600 | 0.05272200  |
| C | 2.66824800 | -3.81436200 | -0.10797500 |
| C | 2.89083200 | -4.68538000 | 0.95445300  |
| C | 2.74626600 | -4.21045500 | 2.25315100  |
| C | 2.19351300 | -2.13717400 | 3.74565000  |
| H | 2.08628800 | -1.85440800 | -0.80208900 |
| H | 3.18096100 | -5.70889300 | 0.75373300  |

|   |              |              |              |
|---|--------------|--------------|--------------|
| H | 2. 93026000  | -4. 86557700 | 3. 09777300  |
| H | 2. 95648500  | -2. 35809300 | 4. 49516900  |
| H | 1. 21369100  | -2. 36953000 | 4. 17873000  |
| C | 3. 07027700  | 3. 01851900  | -1. 17901900 |
| C | 2. 82378600  | 2. 65134100  | -2. 50347300 |
| C | 3. 42789400  | 4. 30694800  | -0. 77902300 |
| C | 2. 95311500  | 3. 65247500  | -3. 46417500 |
| C | 3. 54194900  | 5. 26763500  | -1. 78119200 |
| C | 3. 30771900  | 4. 95880600  | -3. 12303200 |
| H | 2. 77054200  | 3. 40332100  | -4. 50608600 |
| H | 3. 81646000  | 6. 28262400  | -1. 50565700 |
| C | 3. 66533200  | 4. 64153000  | 0. 66947800  |
| H | 4. 56246300  | 4. 14397600  | 1. 04815900  |
| H | 2. 82314300  | 4. 32025100  | 1. 29109400  |
| H | 3. 78898000  | 5. 71798700  | 0. 79450200  |
| C | 3. 40968200  | 6. 02779200  | -4. 17930300 |
| H | 4. 22938300  | 6. 71727400  | -3. 96444600 |
| H | 2. 48650300  | 6. 61469800  | -4. 21823600 |
| H | 3. 56978200  | 5. 59275300  | -5. 16779600 |
| C | 2. 42498900  | 1. 24776300  | -2. 87227600 |
| H | 3. 09457600  | 0. 51004100  | -2. 41739800 |
| H | 2. 46347000  | 1. 11744700  | -3. 95469100 |
| H | 1. 40629400  | 1. 02559200  | -2. 53405500 |
| H | 1. 62462700  | -0. 01669100 | 3. 95645500  |
| N | 2. 84563600  | -4. 32251600 | -1. 47472700 |
| O | 3. 14141700  | -5. 49698300 | -1. 61219000 |
| O | 2. 69139300  | -3. 54176300 | -2. 39696200 |
| C | -2. 09709300 | 0. 28853300  | 2. 05677800  |
| C | -1. 46463500 | 1. 08303900  | 3. 06286500  |
| C | -1. 92568500 | 1. 03550200  | 4. 39306200  |
| C | -2. 97801000 | 0. 19811700  | 4. 70451300  |
| C | -3. 59096700 | -0. 59576600 | 3. 70787800  |
| C | -3. 16827500 | -0. 56456700 | 2. 39263400  |
| C | -0. 49008600 | 1. 39415000  | 1. 08105000  |
| C | -0. 40908300 | 1. 78250500  | 2. 40625000  |
| H | -1. 45917100 | 1. 65087300  | 5. 15759200  |
| H | -3. 34551100 | 0. 14725600  | 5. 72473700  |
| H | -4. 41748000 | -1. 24413900 | 3. 98295900  |
| H | -3. 65591900 | -1. 17324800 | 1. 63780200  |
| N | -1. 49868300 | 0. 50871100  | 0. 83779500  |
| H | 0. 29412800  | 2. 48403200  | 2. 83666800  |
| C | 0. 46020200  | 1. 80675900  | 0. 02001000  |
| O | 0. 22821100  | 2. 53902500  | -0. 90751500 |
| C | -2. 99062800 | -1. 86692400 | -0. 78036400 |

|   |             |             |             |
|---|-------------|-------------|-------------|
| C | -1.71386900 | -1.91302400 | -0.20432900 |
| C | -1.35490100 | -2.92638700 | 0.65447500  |
| C | -2.30467400 | -3.91672500 | 0.95646500  |
| C | -3.57818700 | -3.86684300 | 0.38784000  |
| C | -3.93340200 | -2.83563300 | -0.49571000 |
| C | -1.94870300 | -0.02144000 | -1.66866700 |
| C | -0.96920000 | -0.70330000 | -0.67578400 |
| H | -0.36935600 | -2.97469300 | 1.10851100  |
| H | -4.31468300 | -4.62624800 | 0.61953400  |
| H | -4.93033600 | -2.80138800 | -0.92254300 |
| N | -3.11360700 | -0.74806900 | -1.62614800 |
| O | -1.72354800 | 0.93828700  | -2.37411600 |
| C | -4.33151400 | -0.36830800 | -2.30600100 |
| H | -4.66386100 | -1.18546800 | -2.95705700 |
| H | -4.06291200 | 0.47919500  | -2.94442000 |
| C | -5.43416500 | 0.00988000  | -1.33623800 |
| C | -6.76481400 | -0.28965800 | -1.62927000 |
| C | -5.12663400 | 0.66478300  | -0.14217900 |
| C | -7.77929800 | 0.06973000  | -0.74458800 |
| H | -7.00749700 | -0.81123100 | -2.55190400 |
| C | -6.13862800 | 1.01359000  | 0.74776800  |
| H | -4.08846900 | 0.88719100  | 0.09640200  |
| C | -7.46775200 | 0.72021100  | 0.44720300  |
| H | -8.81152600 | -0.16847700 | -0.98151400 |
| H | -5.88456700 | 1.50900300  | 1.67989400  |
| H | -8.25669300 | 0.99114400  | 1.14157100  |
| O | 0.26015000  | -0.56622300 | -0.77799400 |
| O | -1.88665700 | -4.88266800 | 1.82017800  |
| C | -2.81646800 | -5.88931000 | 2.17105000  |
| H | -2.30162900 | -6.54947500 | 2.86794400  |
| H | -3.69967100 | -5.46177500 | 2.65938600  |
| H | -3.13192900 | -6.46332700 | 1.29238500  |

**TS5(S)**

|   |             |             |             |
|---|-------------|-------------|-------------|
| C | -1.35712700 | 0.45702100  | -0.18706500 |
| C | -1.98123800 | -0.85446900 | -1.79844900 |
| C | -2.47521500 | -1.72762100 | 0.45424700  |
| H | -1.97375600 | -1.59037900 | 1.41350000  |
| N | -1.45689900 | 0.17814800  | -2.39629600 |
| N | -1.07391700 | 0.99156000  | -1.37309500 |
| N | -1.96254400 | -0.70279200 | -0.44423200 |
| C | -2.44728100 | -2.17584600 | -2.31460900 |
| H | -2.10681200 | -2.32410200 | -3.33868600 |
| H | -3.54331200 | -2.24271000 | -2.28483200 |

|   |             |             |             |
|---|-------------|-------------|-------------|
| C | -2.18215000 | -3.15619700 | -0.12977700 |
| O | -1.83009700 | -3.15919200 | -1.50537300 |
| C | -4.54632400 | -2.92432200 | 0.36179600  |
| C | -3.98214000 | -1.66300900 | 0.55030500  |
| C | -4.76000500 | -0.53891400 | 0.78236500  |
| C | -6.13512500 | -0.73361900 | 0.81013400  |
| C | -6.73465600 | -1.97781100 | 0.62906900  |
| C | -5.92931900 | -3.08861200 | 0.40492900  |
| C | -3.47614900 | -3.96014900 | 0.13656500  |
| H | -4.32469800 | 0.44190500  | 0.94174400  |
| H | -7.81378900 | -2.05810300 | 0.66120100  |
| H | -6.37809200 | -4.06500000 | 0.25729900  |
| H | -3.68853800 | -4.62727200 | -0.70314400 |
| H | -3.35938000 | -4.58232900 | 1.03007200  |
| C | -0.54227700 | 2.31143300  | -1.61277200 |
| C | -1.36608600 | 3.40204600  | -1.31847500 |
| C | 0.76543800  | 2.44626800  | -2.09218200 |
| C | -0.81648700 | 4.67582200  | -1.45970500 |
| C | 1.26088500  | 3.74210300  | -2.21414000 |
| C | 0.49968300  | 4.86248200  | -1.87884100 |
| H | -1.43358300 | 5.53995500  | -1.22728400 |
| H | 2.28235700  | 3.87521700  | -2.56349500 |
| C | 1.63920500  | 1.27165800  | -2.43762400 |
| H | 1.06260900  | 0.38442300  | -2.69884900 |
| H | 2.26773800  | 1.01862200  | -1.57682900 |
| H | 2.29455200  | 1.53224200  | -3.27190200 |
| C | 1.10513900  | 6.23878200  | -1.95591300 |
| H | 0.34717700  | 7.01555800  | -1.83797200 |
| H | 1.61559300  | 6.39278700  | -2.91029800 |
| H | 1.84836000  | 6.36334600  | -1.16143000 |
| C | -2.78900800 | 3.23326800  | -0.84722800 |
| H | -3.27343400 | 2.36783100  | -1.30889700 |
| H | -3.37202600 | 4.12056700  | -1.09929800 |
| H | -2.83995200 | 3.10491600  | 0.23951300  |
| H | -1.31593300 | -3.58540800 | 0.37391900  |
| N | -6.99820100 | 0.43237500  | 1.03460000  |
| O | -8.20258400 | 0.25047000  | 1.08074200  |
| O | -6.46341900 | 1.52013600  | 1.15973800  |
| C | 2.17608800  | 2.19160500  | 0.93834800  |
| C | 1.60115200  | 3.40672600  | 1.42504600  |
| C | 2.37731700  | 4.57933800  | 1.49458300  |
| C | 3.70054500  | 4.52561900  | 1.10447800  |
| C | 4.27005000  | 3.31462900  | 0.64633900  |
| C | 3.53306300  | 2.14849900  | 0.56351400  |



|   |             |             |             |
|---|-------------|-------------|-------------|
| C | 0.07526000  | 1.78282700  | 1.36450800  |
| C | 0.24026800  | 3.10967800  | 1.71604700  |
| H | 1.93684600  | 5.50927800  | 1.84379700  |
| H | 4.31543500  | 5.41911800  | 1.14545800  |
| H | 5.31382100  | 3.30408500  | 0.34669400  |
| H | 3.98357500  | 1.23135400  | 0.19851700  |
| N | 1.22095400  | 1.21125900  | 0.87737800  |
| H | -0.54041200 | 3.78691400  | 2.03559400  |
| C | -1.20789900 | 1.12445400  | 1.16857100  |
| O | -2.20286900 | 1.18767800  | 1.86584000  |
| C | 3.51702000  | -1.13340800 | 1.05425700  |
| C | 2.54957900  | -0.75629700 | 1.99313100  |
| C | 2.88307800  | -0.53256500 | 3.30811000  |
| C | 4.22694400  | -0.68169400 | 3.69167200  |
| C | 5.19046800  | -1.05646300 | 2.75438800  |
| C | 4.83981000  | -1.28994600 | 1.41570700  |
| C | 1.56808300  | -1.14839400 | -0.15520800 |
| C | 1.22794600  | -0.67950700 | 1.28251400  |
| H | 2.13923300  | -0.23851300 | 4.04177700  |
| H | 6.22570500  | -1.17880100 | 3.04699700  |
| H | 5.59521700  | -1.59452000 | 0.69892200  |
| N | 2.92768200  | -1.28844700 | -0.22236900 |
| O | 0.77606100  | -1.39624400 | -1.04772600 |
| C | 3.63516300  | -1.73625800 | -1.40640800 |
| H | 4.51238300  | -1.09681600 | -1.55867300 |
| H | 2.94753100  | -1.57591900 | -2.24261400 |
| C | 4.04311100  | -3.19201700 | -1.32522500 |
| C | 5.37264200  | -3.57693400 | -1.48421500 |
| C | 3.06977400  | -4.16748200 | -1.09058400 |
| C | 5.73192700  | -4.92206000 | -1.40762800 |
| H | 6.13244200  | -2.82095800 | -1.66777300 |
| C | 3.42663300  | -5.50900200 | -1.01241100 |
| H | 2.03093200  | -3.86545600 | -0.97687200 |
| C | 4.75989300  | -5.88886500 | -1.16978400 |
| H | 6.77078800  | -5.21149800 | -1.52956000 |
| H | 2.66533500  | -6.26126100 | -0.83222200 |
| H | 5.03770600  | -6.93610800 | -1.10761100 |
| O | 0.11444400  | -0.93653600 | 1.78074900  |
| O | 4.49016200  | -0.44173800 | 5.00552100  |
| C | 5.83276700  | -0.56073100 | 5.43375600  |
| H | 6.48437500  | 0.13820100  | 4.89680100  |
| H | 5.83655000  | -0.31614300 | 6.49510200  |
| H | 6.20685000  | -1.58144800 | 5.29394500  |

**H/H/5-Me/Bn**

**TS5(R)**

|   |             |              |              |
|---|-------------|--------------|--------------|
| C | 1. 89793700 | 1. 38512100  | 0. 22840600  |
| C | 3. 67452500 | 0. 59046000  | 1. 21201800  |
| C | 1. 66834100 | -0. 62978000 | 1. 83514500  |
| H | 0. 58558400 | -0. 50119900 | 1. 78057400  |
| N | 4. 11917500 | 1. 53192200  | 0. 42691400  |
| N | 3. 00126900 | 2. 00590000  | -0. 18729100 |
| N | 2. 32160200 | 0. 45065700  | 1. 09781300  |
| C | 4. 34238100 | -0. 19526600 | 2. 29671100  |
| H | 5. 28797500 | 0. 27715000  | 2. 56230200  |
| H | 4. 53251500 | -1. 22752800 | 1. 98166400  |
| C | 2. 16170200 | -0. 60915300 | 3. 31024700  |
| O | 3. 49569100 | -0. 11682100 | 3. 43379100  |
| C | 2. 25296300 | -2. 84721100 | 2. 46128900  |
| C | 2. 07927400 | -2. 01047900 | 1. 35554200  |
| C | 2. 24402600 | -2. 47429700 | 0. 05879000  |
| C | 2. 56930400 | -3. 81883800 | -0. 07882400 |
| C | 2. 71693000 | -4. 68867600 | 0. 99778300  |
| C | 2. 55868300 | -4. 19425000 | 2. 28812200  |
| C | 2. 05318700 | -2. 08053900 | 3. 74387400  |
| H | 2. 09325900 | -1. 84217100 | -0. 80703700 |
| H | 2. 96378500 | -5. 72673100 | 0. 81440600  |
| H | 2. 68748600 | -4. 84917200 | 3. 14316300  |
| H | 2. 78874100 | -2. 31612300 | 4. 51594500  |
| H | 1. 05501400 | -2. 27563000 | 4. 15371400  |
| C | 3. 11845800 | 3. 03141100  | -1. 19293100 |
| C | 2. 93282300 | 2. 65771200  | -2. 52668400 |
| C | 3. 44441500 | 4. 32239600  | -0. 78121100 |
| C | 3. 08847500 | 3. 65669700  | -3. 48285400 |
| C | 3. 58792200 | 5. 28378700  | -1. 78156600 |
| C | 3. 41253300 | 4. 96984500  | -3. 12928000 |
| H | 2. 95367900 | 3. 40394500  | -4. 53138400 |
| H | 3. 83994300 | 6. 30193000  | -1. 49732300 |
| C | 3. 62510300 | 4. 66070400  | 0. 67453100  |
| H | 4. 51197700 | 4. 17057900  | 1. 08600700  |
| H | 2. 76397700 | 4. 33362400  | 1. 26641500  |
| H | 3. 73604600 | 5. 73813300  | 0. 80283200  |
| C | 3. 54683800 | 6. 02919700  | -4. 19161200 |
| H | 4. 08157400 | 6. 90322300  | -3. 81475400 |
| H | 2. 55954000 | 6. 35882200  | -4. 52994800 |
| H | 4. 08032800 | 5. 64423100  | -5. 06415400 |
| C | 2. 57981100 | 1. 24341900  | -2. 90136300 |
| H | 3. 27742600 | 0. 52910500  | -2. 45089000 |
| H | 2. 61903800 | 1. 11817300  | -3. 98421800 |

|   |              |              |              |
|---|--------------|--------------|--------------|
| H | 1. 57100700  | 0. 98339100  | -2. 56161800 |
| H | 1. 54508100  | 0. 05864800  | 3. 91464300  |
| N | 2. 76352700  | -4. 34894400 | -1. 43504300 |
| O | 2. 98701600  | -5. 54122100 | -1. 55406200 |
| O | 2. 69449900  | -3. 56719600 | -2. 36653300 |
| C | -2. 05196900 | 0. 35136600  | 2. 05588500  |
| C | -1. 41717600 | 1. 19145300  | 3. 02307700  |
| C | -1. 85271000 | 1. 17838100  | 4. 36321600  |
| C | -2. 88106200 | 0. 33043500  | 4. 72188600  |
| C | -3. 49468400 | -0. 50984800 | 3. 76394800  |
| C | -3. 09751700 | -0. 51372500 | 2. 44067400  |
| C | -0. 48534100 | 1. 45420000  | 1. 01274200  |
| C | -0. 38752100 | 1. 88703700  | 2. 32405100  |
| H | -1. 38585700 | 1. 82867800  | 5. 09805400  |
| H | -3. 22857300 | 0. 30619800  | 5. 75007900  |
| H | -4. 30024000 | -1. 16746400 | 4. 07664400  |
| H | -3. 58271800 | -1. 16178600 | 1. 71769000  |
| N | -1. 48044500 | 0. 54153700  | 0. 81998700  |
| H | 0. 31464300  | 2. 60982900  | 2. 72000400  |
| C | 0. 46955400  | 1. 82772000  | -0. 06100400 |
| O | 0. 25859900  | 2. 53321400  | -1. 01352800 |
| C | -2. 99223200 | -1. 89476800 | -0. 71416200 |
| C | -1. 69695900 | -1. 91178800 | -0. 18151600 |
| C | -1. 30029800 | -2. 91763500 | 0. 67450800  |
| C | -2. 20789100 | -3. 92995500 | 1. 02380900  |
| C | -3. 49571700 | -3. 88738400 | 0. 48740600  |
| C | -3. 91227400 | -2. 87749800 | -0. 39050000 |
| C | -2. 01599500 | -0. 03615400 | -1. 64801500 |
| C | -0. 98678900 | -0. 69900700 | -0. 69130300 |
| H | -0. 29308000 | -2. 92506600 | 1. 08368800  |
| H | -4. 20318500 | -4. 66600300 | 0. 75966200  |
| H | -4. 92321400 | -2. 86123600 | -0. 78426900 |
| N | -3. 16521700 | -0. 78805500 | -1. 56178500 |
| O | -1. 84587800 | 0. 92962400  | -2. 35890400 |
| C | -4. 40693900 | -0. 44285900 | -2. 21735200 |
| H | -4. 73807800 | -1. 27775300 | -2. 84591000 |
| H | -4. 16968000 | 0. 39823800  | -2. 87638100 |
| C | -5. 49384200 | -0. 06747100 | -1. 22980900 |
| C | -6. 82470600 | -0. 39532200 | -1. 48909600 |
| C | -5. 17304700 | 0. 61563800  | -0. 05524400 |
| C | -7. 82683800 | -0. 03644200 | -0. 59046100 |
| H | -7. 07732000 | -0. 93840600 | -2. 39650000 |
| C | -6. 17242700 | 0. 96409000  | 0. 84891900  |
| H | -4. 13441200 | 0. 86142900  | 0. 15639500  |

|               |             |             |             |
|---------------|-------------|-------------|-------------|
| C             | -7.50213000 | 0.64205700  | 0.58210800  |
| H             | -8.85941600 | -0.29631800 | -0.80159500 |
| H             | -5.90776200 | 1.48259500  | 1.76534300  |
| H             | -8.28114200 | 0.91307800  | 1.28758100  |
| O             | 0.23681700  | -0.54509500 | -0.83415000 |
| C             | -1.77851500 | -5.03083500 | 1.96004700  |
| H             | -0.96233600 | -5.61734600 | 1.52604900  |
| H             | -1.41488600 | -4.61955000 | 2.90703400  |
| H             | -2.60437700 | -5.71050500 | 2.17997500  |
| <b>TS5(S)</b> |             |             |             |
| C             | -1.35048800 | 0.47075900  | -0.18479200 |
| C             | -1.95712500 | -0.87300300 | -1.77611700 |
| C             | -2.44273200 | -1.71629400 | 0.49034800  |
| H             | -1.94224500 | -1.55838600 | 1.44690200  |
| N             | -1.44603100 | 0.15711100  | -2.38953200 |
| N             | -1.07384700 | 0.99104400  | -1.37877100 |
| N             | -1.94098500 | -0.70031600 | -0.42435500 |
| C             | -2.40394500 | -2.20891800 | -2.27150300 |
| H             | -2.05958800 | -2.36917900 | -3.29247100 |
| H             | -3.49898700 | -2.29070700 | -2.24216600 |
| C             | -2.13500000 | -3.15085500 | -0.07166700 |
| O             | -1.77439900 | -3.16963500 | -1.44474400 |
| C             | -4.50311200 | -2.93299700 | 0.41009900  |
| C             | -3.95014600 | -1.66474600 | 0.58475000  |
| C             | -4.73802400 | -0.54486400 | 0.80300500  |
| C             | -6.11138000 | -0.75109200 | 0.83160500  |
| C             | -6.69998600 | -2.00236300 | 0.66352700  |
| C             | -5.88482000 | -3.10860600 | 0.45291200  |
| C             | -3.42379400 | -3.96219300 | 0.19864700  |
| H             | -4.31124800 | 0.44134900  | 0.95171500  |
| H             | -7.77844500 | -2.09159000 | 0.69508300  |
| H             | -6.32504700 | -4.09034900 | 0.31539900  |
| H             | -3.62815000 | -4.63975600 | -0.63474600 |
| H             | -3.30495200 | -4.57447100 | 1.09866800  |
| C             | -0.55960100 | 2.31406600  | -1.63865700 |
| C             | -1.39743800 | 3.39795400  | -1.35967500 |
| C             | 0.74518800  | 2.45926600  | -2.12342300 |
| C             | -0.86612700 | 4.67682900  | -1.52367500 |
| C             | 1.22227900  | 3.75965600  | -2.26765100 |
| C             | 0.44593600  | 4.87477800  | -1.95000700 |
| H             | -1.49486400 | 5.53597000  | -1.30424000 |
| H             | 2.24080000  | 3.90144100  | -2.62212400 |
| C             | 1.63376600  | 1.29138600  | -2.45340000 |
| H             | 1.06784400  | 0.39630100  | -2.71147400 |

|   |              |              |              |
|---|--------------|--------------|--------------|
| H | 2. 25938300  | 1. 05155300  | -1. 58674600 |
| H | 2. 29172400  | 1. 55219000  | -3. 28547500 |
| C | 1. 03097700  | 6. 25797800  | -2. 05667400 |
| H | 0. 26498600  | 7. 02612700  | -1. 93450400 |
| H | 1. 52056900  | 6. 40574200  | -3. 02294900 |
| H | 1. 78791000  | 6. 40331900  | -1. 27909700 |
| C | -2. 81683500 | 3. 21775400  | -0. 88213500 |
| H | -3. 29186100 | 2. 34081000  | -1. 33172100 |
| H | -3. 41125800 | 4. 09478600  | -1. 14322900 |
| H | -2. 86306000 | 3. 10196900  | 0. 20619700  |
| H | -1. 26825400 | -3. 56562700 | 0. 44319000  |
| N | -6. 98458800 | 0. 40973600  | 1. 04316700  |
| O | -8. 18743300 | 0. 21809500  | 1. 08992700  |
| O | -6. 45926400 | 1. 50324500  | 1. 15792300  |
| C | 2. 16444600  | 2. 26129000  | 0. 91366600  |
| C | 1. 57510000  | 3. 47801400  | 1. 37870900  |
| C | 2. 33800300  | 4. 66023100  | 1. 42921300  |
| C | 3. 66257600  | 4. 61443300  | 1. 04272900  |
| C | 4. 24653900  | 3. 40211200  | 0. 60699100  |
| C | 3. 52262800  | 2. 22663500  | 0. 54238300  |
| C | 0. 06749700  | 1. 83627000  | 1. 34491600  |
| C | 0. 21711000  | 3. 17070100  | 1. 67327800  |
| H | 1. 88620100  | 5. 59116700  | 1. 76092500  |
| H | 4. 26755300  | 5. 51518400  | 1. 06972800  |
| H | 5. 29110400  | 3. 39785900  | 0. 31005200  |
| H | 3. 98466500  | 1. 30863900  | 0. 19436500  |
| N | 1. 22017200  | 1. 26960100  | 0. 86892900  |
| H | -0. 57184800 | 3. 84449300  | 1. 97953600  |
| C | -1. 20760800 | 1. 15843800  | 1. 16112800  |
| O | -2. 20175800 | 1. 21935500  | 1. 85973000  |
| C | 3. 54140600  | -1. 05253700 | 1. 07293400  |
| C | 2. 57182200  | -0. 67105500 | 2. 00584200  |
| C | 2. 91270400  | -0. 42991800 | 3. 31952200  |
| C | 4. 25251700  | -0. 56442700 | 3. 72025400  |
| C | 5. 20187600  | -0. 94382200 | 2. 77020800  |
| C | 4. 86877300  | -1. 19786400 | 1. 43319200  |
| C | 1. 59429700  | -1. 09495100 | -0. 13625800 |
| C | 1. 25065500  | -0. 60908700 | 1. 29523200  |
| H | 2. 14705400  | -0. 13190800 | 4. 03208800  |
| H | 6. 23824300  | -1. 05006200 | 3. 07868300  |
| H | 5. 62494800  | -1. 50466500 | 0. 71813200  |
| N | 2. 95671600  | -1. 22585000 | -0. 20101700 |
| O | 0. 80721300  | -1. 36222500 | -1. 02672500 |
| C | 3. 66683300  | -1. 68305400 | -1. 38053500 |

|   |             |              |              |
|---|-------------|--------------|--------------|
| H | 4. 54531100 | -1. 04600500 | -1. 53417200 |
| H | 2. 98182200 | -1. 52659400 | -2. 21962000 |
| C | 4. 07171100 | -3. 13895700 | -1. 28985500 |
| C | 5. 40170800 | -3. 52623200 | -1. 43862300 |
| C | 3. 09536600 | -4. 11216200 | -1. 05771200 |
| C | 5. 75870100 | -4. 87147200 | -1. 35418100 |
| H | 6. 16367000 | -2. 77212200 | -1. 62062200 |
| C | 3. 45007800 | -5. 45379300 | -0. 97162300 |
| H | 2. 05613300 | -3. 80820100 | -0. 95284700 |
| C | 4. 78383200 | -5. 83599900 | -1. 11873700 |
| H | 6. 79794000 | -5. 16279200 | -1. 46805300 |
| H | 2. 68666100 | -6. 20439700 | -0. 79349000 |
| H | 5. 05983800 | -6. 88334100 | -1. 05046000 |
| O | 0. 13800800 | -0. 87291900 | 1. 79576700  |
| C | 4. 64400800 | -0. 31138600 | 5. 15401000  |
| H | 4. 19717100 | -1. 05517700 | 5. 82113500  |
| H | 5. 72784100 | -0. 35399000 | 5. 28079800  |
| H | 4. 30048400 | 0. 67207500  | 5. 48730700  |

**H/H/5-F/Bn**

**TS5(R)**

|   |             |              |              |
|---|-------------|--------------|--------------|
| C | 1. 89947900 | 1. 37167700  | 0. 27998300  |
| C | 3. 70904900 | 0. 59597200  | 1. 21621800  |
| C | 1. 73404100 | -0. 64774500 | 1. 89492900  |
| H | 0. 64938200 | -0. 53028200 | 1. 86842100  |
| N | 4. 12378600 | 1. 53450500  | 0. 41178400  |
| N | 2. 98577100 | 1. 99626200  | -0. 17344200 |
| N | 2. 35411200 | 0. 44391500  | 1. 14175600  |
| C | 4. 41283600 | -0. 16790400 | 2. 29402900  |
| H | 5. 35719700 | 0. 32124000  | 2. 53217200  |
| H | 4. 61012200 | -1. 20210100 | 1. 99030300  |
| C | 2. 26829400 | -0. 61848800 | 3. 35789500  |
| O | 3. 58765900 | -0. 08240600 | 3. 44620500  |
| C | 2. 40464200 | -2. 85032200 | 2. 50057200  |
| C | 2. 15747500 | -2. 02143000 | 1. 40225800  |
| C | 2. 29873600 | -2. 48137100 | 0. 10094200  |
| C | 2. 68364900 | -3. 80898800 | -0. 04764900 |
| C | 2. 91300200 | -4. 66824700 | 1. 02278800  |
| C | 2. 77166500 | -4. 18037200 | 2. 31714400  |
| C | 2. 22119900 | -2. 09293600 | 3. 79047300  |
| H | 2. 09654300 | -1. 85779500 | -0. 76021200 |
| H | 3. 20645100 | -5. 69267300 | 0. 83165100  |
| H | 2. 96205200 | -4. 82577500 | 3. 16781500  |
| H | 2. 98918400 | -2. 30473700 | 4. 53744700  |
| H | 1. 24472000 | -2. 32201100 | 4. 23266700  |

|   |              |              |              |
|---|--------------|--------------|--------------|
| C | 3. 06789900  | 3. 00930300  | -1. 19532200 |
| C | 2. 81847000  | 2. 62563100  | -2. 51592000 |
| C | 3. 42454700  | 4. 30163000  | -0. 81180700 |
| C | 2. 94392000  | 3. 61453100  | -3. 48775700 |
| C | 3. 53399800  | 5. 25159800  | -1. 82650700 |
| C | 3. 29724200  | 4. 92675500  | -3. 16262600 |
| H | 2. 75969400  | 3. 35322000  | -4. 52660800 |
| H | 3. 80712900  | 6. 26998100  | -1. 56317100 |
| C | 3. 66735300  | 4. 65451500  | 0. 63139500  |
| H | 4. 56989000  | 4. 16732700  | 1. 01078600  |
| H | 2. 83080400  | 4. 33513500  | 1. 26147300  |
| H | 3. 78477900  | 5. 73312200  | 0. 74321200  |
| C | 3. 39245800  | 5. 97641100  | -4. 23852700 |
| H | 4. 01103900  | 6. 81729700  | -3. 91875400 |
| H | 2. 39830400  | 6. 36526200  | -4. 48110400 |
| H | 3. 81534300  | 5. 56155200  | -5. 15644600 |
| C | 2. 42105600  | 1. 21688600  | -2. 86613300 |
| H | 3. 09175400  | 0. 48559900  | -2. 40259000 |
| H | 2. 45835900  | 1. 07274400  | -3. 94681700 |
| H | 1. 40292500  | 0. 99845800  | -2. 52403300 |
| H | 1. 64923200  | 0. 02831900  | 3. 98202000  |
| N | 2. 85829100  | -4. 33018800 | -1. 41000700 |
| O | 3. 16046400  | -5. 50410800 | -1. 53642700 |
| O | 2. 69502500  | -3. 55975300 | -2. 33932800 |
| C | -2. 09089200 | 0. 31444400  | 2. 08526900  |
| C | -1. 44976300 | 1. 11239300  | 3. 08315900  |
| C | -1. 90539200 | 1. 07748600  | 4. 41554300  |
| C | -2. 96110800 | 0. 24855400  | 4. 73781100  |
| C | -3. 58284100 | -0. 54905500 | 3. 74978000  |
| C | -3. 16543400 | -0. 52985400 | 2. 43263000  |
| C | -0. 48190300 | 1. 40432700  | 1. 09523700  |
| C | -0. 39297900 | 1. 80102000  | 2. 41742900  |
| H | -1. 43221700 | 1. 69605200  | 5. 17331600  |
| H | -3. 32462700 | 0. 20754400  | 5. 75983900  |
| H | -4. 41216400 | -1. 19023200 | 4. 03280800  |
| H | -3. 66188500 | -1. 14053800 | 1. 68530600  |
| N | -1. 49712600 | 0. 52322900  | 0. 86181200  |
| H | 0. 31547300  | 2. 50203800  | 2. 84005900  |
| C | 0. 46412300  | 1. 80583300  | 0. 02681700  |
| O | 0. 22608800  | 2. 52074500  | -0. 91267900 |
| C | -2. 99776000 | -1. 86139300 | -0. 73294000 |
| C | -1. 72043800 | -1. 90906200 | -0. 16151900 |
| C | -1. 35899100 | -2. 92390000 | 0. 70299700  |
| C | -2. 32710500 | -3. 88258600 | 0. 98612100  |

|   |             |             |             |
|---|-------------|-------------|-------------|
| C | -3.60012000 | -3.84879000 | 0.43697800  |
| C | -3.95476000 | -2.82352900 | -0.44626500 |
| C | -1.94876200 | -0.03023300 | -1.63983900 |
| C | -0.96962200 | -0.70920300 | -0.64558100 |
| H | -0.37309200 | -2.98135800 | 1.15400700  |
| H | -4.30697300 | -4.62664200 | 0.70264600  |
| H | -4.95065100 | -2.78111800 | -0.87362000 |
| N | -3.12032700 | -0.74954500 | -1.58291700 |
| O | -1.72263500 | 0.91871400  | -2.35725100 |
| C | -4.33859400 | -0.36987200 | -2.26428300 |
| H | -4.67256900 | -1.18883000 | -2.91201200 |
| H | -4.06702700 | 0.47376100  | -2.90644600 |
| C | -5.43904100 | 0.01539200  | -1.29517500 |
| C | -6.76976500 | -0.28920200 | -1.58261200 |
| C | -5.12952400 | 0.68063500  | -0.10730200 |
| C | -7.78259300 | 0.07520200  | -0.69816700 |
| H | -7.01386700 | -0.81861600 | -2.50035200 |
| C | -6.14000500 | 1.03429000  | 0.78247700  |
| H | -4.09133500 | 0.90783600  | 0.12675200  |
| C | -7.46921600 | 0.73564100  | 0.48764900  |
| H | -8.81490000 | -0.16693600 | -0.93052800 |
| H | -5.88464500 | 1.53787600  | 1.70980200  |
| H | -8.25686200 | 1.01043300  | 1.18192400  |
| O | 0.25925200  | -0.58121900 | -0.74778200 |
| F | -2.01464600 | -4.88446500 | 1.82987200  |

**TS5(S)**

|   |             |             |             |
|---|-------------|-------------|-------------|
| C | -1.35583100 | 0.46972800  | -0.18445800 |
| C | -1.96494400 | -0.87622900 | -1.77307800 |
| C | -2.45954600 | -1.71149900 | 0.49467600  |
| H | -1.96234300 | -1.55382800 | 1.45280200  |
| N | -1.45055300 | 0.15119800  | -2.38833200 |
| N | -1.07668700 | 0.98637400  | -1.37940800 |
| N | -1.94925600 | -0.70057500 | -0.42150500 |
| C | -2.41497300 | -2.21214800 | -2.26571200 |
| H | -2.06853100 | -2.37653700 | -3.28531200 |
| H | -3.51032100 | -2.29045600 | -2.23883500 |
| C | -2.15759100 | -3.14915800 | -0.06305400 |
| O | -1.79027300 | -3.17191600 | -1.43418100 |
| C | -4.52613000 | -2.91736700 | 0.41044100  |
| C | -3.96698700 | -1.65184200 | 0.58490900  |
| C | -4.74951100 | -0.52788500 | 0.80161700  |
| C | -6.12390700 | -0.72710100 | 0.82823200  |
| C | -6.71860200 | -1.97545600 | 0.66000800  |
| C | -5.90875500 | -3.08592400 | 0.45133800  |



|   |             |             |             |
|---|-------------|-------------|-------------|
| C | -3.45220600 | -3.95273300 | 0.20228400  |
| H | -4.31824500 | 0.45619200  | 0.95122800  |
| H | -7.79753100 | -2.05924700 | 0.69019600  |
| H | -6.35362200 | -4.06560800 | 0.31414300  |
| H | -3.65770200 | -4.62849800 | -0.63231700 |
| H | -3.34038300 | -4.56644700 | 1.10218400  |
| C | -0.55917000 | 2.30789200  | -1.64086500 |
| C | -1.39255900 | 3.39447500  | -1.35876200 |
| C | 0.74460800  | 2.44910300  | -2.12961200 |
| C | -0.85699100 | 4.67158900  | -1.52289000 |
| C | 1.22591600  | 3.74788400  | -2.27397800 |
| C | 0.45455600  | 4.86544600  | -1.95259100 |
| H | -1.48220900 | 5.53269100  | -1.30118400 |
| H | 2.24368000  | 3.88638900  | -2.63184200 |
| C | 1.62851600  | 1.27865100  | -2.46284600 |
| H | 1.05963600  | 0.38562400  | -2.72154900 |
| H | 2.25446200  | 1.03600400  | -1.59732900 |
| H | 2.28617300  | 1.53840100  | -3.29547200 |
| C | 1.04391300  | 6.24676800  | -2.05950600 |
| H | 0.28028000  | 7.01723600  | -1.93725800 |
| H | 1.53376700  | 6.39287700  | -3.02588200 |
| H | 1.80135800  | 6.38991800  | -1.28204500 |
| C | -2.81213900 | 3.21966400  | -0.87960600 |
| H | -3.29061700 | 2.34368500  | -1.32738900 |
| H | -3.40375700 | 4.09819300  | -1.14202500 |
| H | -2.85828800 | 3.10636200  | 0.20895500  |
| H | -1.29592700 | -3.56828100 | 0.45678200  |
| N | -6.99144400 | 0.43831700  | 1.03820200  |
| O | -8.19527800 | 0.25280400  | 1.08326500  |
| O | -6.46054400 | 1.52906900  | 1.15337900  |
| C | 2.16406800  | 2.25237500  | 0.90373600  |
| C | 1.58173200  | 3.46653500  | 1.38401900  |
| C | 2.34833200  | 4.64611100  | 1.44021400  |
| C | 3.66986000  | 4.60027000  | 1.04356600  |
| C | 4.24685900  | 3.39085200  | 0.59090800  |
| C | 3.51896500  | 2.21821600  | 0.52033000  |
| C | 0.06885000  | 1.82966100  | 1.34370800  |
| C | 0.22477900  | 3.16065600  | 1.68403100  |
| H | 1.90179900  | 5.57508400  | 1.78411800  |
| H | 4.27762500  | 5.49895700  | 1.07468000  |
| H | 5.28868400  | 3.38695500  | 0.28459800  |
| H | 3.97501100  | 1.30376300  | 0.15540200  |
| N | 1.21699400  | 1.26337900  | 0.85525300  |
| H | -0.55993100 | 3.83410400  | 2.00173200  |

|   |             |             |             |
|---|-------------|-------------|-------------|
| C | -1.20955700 | 1.15893200  | 1.16037600  |
| O | -2.20213400 | 1.22165600  | 1.86105500  |
| C | 3.53671800  | -1.05132100 | 1.07651200  |
| C | 2.56168300  | -0.67788200 | 2.00631800  |
| C | 2.88494000  | -0.44127200 | 3.32718100  |
| C | 4.22386800  | -0.58304600 | 3.67974400  |
| C | 5.20555900  | -0.95001700 | 2.77175100  |
| C | 4.86700800  | -1.19438100 | 1.43659900  |
| C | 1.59252900  | -1.10624600 | -0.13829300 |
| C | 1.24181900  | -0.62930100 | 1.29298500  |
| H | 2.13842200  | -0.15308000 | 4.05946800  |
| H | 6.22861600  | -1.04803700 | 3.11610700  |
| H | 5.62412700  | -1.49629700 | 0.72116000  |
| N | 2.95701200  | -1.22491500 | -0.19941400 |
| O | 0.80976400  | -1.37477100 | -1.03104500 |
| C | 3.67409800  | -1.67704900 | -1.37731800 |
| H | 4.54640700  | -1.03163600 | -1.53117800 |
| H | 2.98853500  | -1.52751200 | -2.21717800 |
| C | 4.09155000  | -3.12926600 | -1.28349300 |
| C | 5.42375800  | -3.50670700 | -1.43835200 |
| C | 3.12403600  | -4.10907600 | -1.04270700 |
| C | 5.79133500  | -4.84893300 | -1.35107900 |
| H | 6.17908600  | -2.74774800 | -1.62791100 |
| C | 3.48937500  | -5.44755700 | -0.95380600 |
| H | 2.08290600  | -3.81347500 | -0.93347900 |
| C | 4.82523900  | -5.81999900 | -1.10673600 |
| H | 6.83211500  | -5.13258700 | -1.46989100 |
| H | 2.73258600  | -6.20322000 | -0.76904700 |
| H | 5.10974600  | -6.86488600 | -1.03621700 |
| O | 0.13276900  | -0.89040800 | 1.79476000  |
| F | 4.58180900  | -0.36340500 | 4.95882300  |

**H/H/5-Br/Bn**

**TS5(R)**

|   |            |             |             |
|---|------------|-------------|-------------|
| C | 1.91059700 | 1.41108500  | 0.20916700  |
| C | 3.67392000 | 0.59967000  | 1.20460400  |
| C | 1.65742200 | -0.61142600 | 1.80026600  |
| H | 0.57590800 | -0.47566800 | 1.73816600  |
| N | 4.13046600 | 1.54617100  | 0.43165400  |
| N | 3.02073900 | 2.02983600  | -0.19009100 |
| N | 2.32225400 | 0.46788400  | 1.07516900  |
| C | 4.32799100 | -0.21363100 | 2.27787200  |
| H | 5.27671500 | 0.24372600  | 2.55838900  |
| H | 4.51106500 | -1.23911100 | 1.93699400  |
| C | 2.12993100 | -0.60220300 | 3.27859600  |

|   |             |             |             |
|---|-------------|-------------|-------------|
| O | 3.48063900  | -0.15952700 | 3.41617300  |
| C | 2.15782500  | -2.84252200 | 2.43213100  |
| C | 2.05357500  | -1.99693300 | 1.32386000  |
| C | 2.23514800  | -2.46411300 | 0.03093500  |
| C | 2.49356100  | -3.82379200 | -0.10194300 |
| C | 2.55464000  | -4.70400700 | 0.97452800  |
| C | 2.38739300  | -4.20477400 | 2.26212200  |
| C | 1.95856000  | -2.06824000 | 3.71065100  |
| H | 2.14524700  | -1.82482100 | -0.83784000 |
| H | 2.74302500  | -5.75461800 | 0.79375800  |
| H | 2.44572300  | -4.86916300 | 3.11738300  |
| H | 2.66783200  | -2.33158900 | 4.49811200  |
| H | 0.94447100  | -2.22798100 | 4.09691500  |
| C | 3.14952100  | 3.06304400  | -1.18612100 |
| C | 2.96817500  | 2.70243300  | -2.52467300 |
| C | 3.48159100  | 4.34788300  | -0.76083300 |
| C | 3.13457200  | 3.70946600  | -3.47010600 |
| C | 3.63578000  | 5.31790600  | -1.75158000 |
| C | 3.46554000  | 5.01741400  | -3.10266900 |
| H | 3.00322900  | 3.46783800  | -4.52174200 |
| H | 3.89216500  | 6.33174500  | -1.45640500 |
| C | 3.65792000  | 4.67172100  | 0.69876700  |
| H | 4.54323800  | 4.17685300  | 1.10787800  |
| H | 2.79486300  | 4.33951100  | 1.28496800  |
| H | 3.76952600  | 5.74770100  | 0.83786700  |
| C | 3.61823000  | 6.08195200  | -4.15731200 |
| H | 4.05650000  | 6.99169700  | -3.74292500 |
| H | 2.64469500  | 6.33924300  | -4.58578700 |
| H | 4.25299700  | 5.73255400  | -4.97576800 |
| C | 2.61010500  | 1.29387500  | -2.91653100 |
| H | 3.29242400  | 0.57008700  | -2.45802200 |
| H | 2.67051800  | 1.17656700  | -3.99934900 |
| H | 1.59195900  | 1.04061000  | -2.60007700 |
| H | 1.52856800  | 0.08846300  | 3.87308000  |
| N | 2.70200800  | -4.35966100 | -1.45393400 |
| O | 2.87055100  | -5.56081600 | -1.57092100 |
| O | 2.69980800  | -3.57277800 | -2.38379300 |
| C | -2.03551700 | 0.38922900  | 2.03458600  |
| C | -1.38631600 | 1.22158800  | 2.99863000  |
| C | -1.80517900 | 1.20437100  | 4.34399200  |
| C | -2.83194000 | 0.35853200  | 4.71167700  |
| C | -3.46084400 | -0.47399300 | 3.75730100  |
| C | -3.08017600 | -0.47213400 | 2.42936700  |
| C | -0.47154300 | 1.48462300  | 0.98055400  |

|               |             |             |             |
|---------------|-------------|-------------|-------------|
| C             | -0.35882800 | 1.91213300  | 2.29228100  |
| H             | -1.32600000 | 1.84905800  | 5.07574300  |
| H             | -3.16614000 | 0.32985800  | 5.74408500  |
| H             | -4.26482400 | -1.13041100 | 4.07619100  |
| H             | -3.58060800 | -1.11288400 | 1.71088800  |
| N             | -1.47602700 | 0.57972200  | 0.79230700  |
| H             | 0.35332800  | 2.62739000  | 2.68426800  |
| C             | 0.48264300  | 1.84908200  | -0.09535800 |
| O             | 0.26862600  | 2.53028100  | -1.06471400 |
| C             | -2.95827600 | -1.91303800 | -0.68323700 |
| C             | -1.65635800 | -1.89534200 | -0.16845900 |
| C             | -1.22075900 | -2.87359700 | 0.69908100  |
| C             | -2.12362800 | -3.87363600 | 1.05663200  |
| C             | -3.42194500 | -3.89796500 | 0.56011600  |
| C             | -3.85847500 | -2.90828500 | -0.32867300 |
| C             | -2.02146100 | -0.05957200 | -1.66766600 |
| C             | -0.96885100 | -0.68608300 | -0.71509500 |
| H             | -0.21441400 | -2.87000100 | 1.09968000  |
| H             | -4.09948800 | -4.68845500 | 0.86247300  |
| H             | -4.87437400 | -2.91810800 | -0.70858800 |
| N             | -3.16080800 | -0.82938500 | -1.54687300 |
| O             | -1.87649600 | 0.89027500  | -2.40213300 |
| C             | -4.41582500 | -0.52103100 | -2.19890600 |
| H             | -4.73255900 | -1.37306500 | -2.81121600 |
| H             | -4.20004400 | 0.31348400  | -2.87333300 |
| C             | -5.50086900 | -0.15244800 | -1.20753700 |
| C             | -6.82118300 | -0.54247900 | -1.43094600 |
| C             | -5.18831300 | 0.58702800  | -0.06496500 |
| C             | -7.82196600 | -0.19035100 | -0.52811000 |
| H             | -7.06709700 | -1.12746800 | -2.31376900 |
| C             | -6.18589000 | 0.92881600  | 0.84359400  |
| H             | -4.15707100 | 0.88237800  | 0.11853700  |
| C             | -7.50548800 | 0.54385300  | 0.61272700  |
| H             | -8.84645600 | -0.49889900 | -0.71089200 |
| H             | -5.92746900 | 1.49156600  | 1.73522100  |
| H             | -8.28301200 | 0.80972700  | 1.32173300  |
| O             | 0.24866100  | -0.52242300 | -0.87102800 |
| Br            | -1.53202700 | -5.22062400 | 2.25397600  |
| <b>TS5(S)</b> |             |             |             |
| C             | -1.35853900 | 0.46668500  | -0.18463500 |
| C             | -1.96687800 | -0.88118100 | -1.77204800 |
| C             | -2.46581300 | -1.71247200 | 0.49670200  |
| H             | -1.96938800 | -1.55456900 | 1.45515000  |
| N             | -1.45138400 | 0.14522200  | -2.38814100 |

|   |             |             |             |
|---|-------------|-------------|-------------|
| N | -1.07801700 | 0.98156800  | -1.38003500 |
| N | -1.95210100 | -0.70388200 | -0.42054500 |
| C | -2.41690200 | -2.21763700 | -2.26325900 |
| H | -2.06901900 | -2.38393400 | -3.28205100 |
| H | -3.51231400 | -2.29549500 | -2.23776800 |
| C | -2.16662000 | -3.15163500 | -0.05923200 |
| O | -1.79369000 | -3.17582200 | -1.42876600 |
| C | -4.53553600 | -2.91298100 | 0.41006400  |
| C | -3.97320500 | -1.64908000 | 0.58579400  |
| C | -4.75301100 | -0.52341200 | 0.80372200  |
| C | -6.12786000 | -0.71924100 | 0.83018800  |
| C | -6.72567700 | -1.96592800 | 0.66068800  |
| C | -5.91858900 | -3.07812800 | 0.45079600  |
| C | -3.46466300 | -3.95127200 | 0.20125800  |
| H | -4.31945100 | 0.45941500  | 0.95474600  |
| H | -7.80479900 | -2.04711100 | 0.69103300  |
| H | -6.36581800 | -4.05661500 | 0.31278000  |
| H | -3.67088900 | -4.62380500 | -0.63582000 |
| H | -3.35692500 | -4.56824800 | 1.09937800  |
| C | -0.55996100 | 2.30286300  | -1.64177300 |
| C | -1.39210200 | 3.38997000  | -1.35788300 |
| C | 0.74381000  | 2.44345000  | -2.13076900 |
| C | -0.85492100 | 4.66671400  | -1.51982500 |
| C | 1.22671900  | 3.74184200  | -2.27288800 |
| C | 0.45687500  | 4.85979300  | -1.94900900 |
| H | -1.47905800 | 5.52815900  | -1.29644200 |
| H | 2.24460400  | 3.87973200  | -2.63062900 |
| C | 1.62655800  | 1.27262800  | -2.46593900 |
| H | 1.05711600  | 0.38029200  | -2.72584700 |
| H | 2.25267400  | 1.02873200  | -1.60093100 |
| H | 2.28414400  | 1.53288300  | -3.29844500 |
| C | 1.04812300  | 6.24055100  | -2.05239700 |
| H | 0.28530100  | 7.01171600  | -1.92951700 |
| H | 1.53945800  | 6.38803100  | -3.01780200 |
| H | 1.80467400  | 6.38111000  | -1.27358500 |
| C | -2.81199800 | 3.21653100  | -0.87909800 |
| H | -3.29112000 | 2.34067800  | -1.32641100 |
| H | -3.40275900 | 4.09535400  | -1.14246300 |
| H | -2.85876400 | 3.10431300  | 0.20953400  |
| H | -1.30842200 | -3.57335800 | 0.46418300  |
| N | -6.99244600 | 0.44811900  | 1.04174200  |
| O | -8.19669400 | 0.26548200  | 1.08705700  |
| O | -6.45877200 | 1.53740500  | 1.15788400  |
| C | 2.16259700  | 2.24786300  | 0.89900600  |

|    |              |              |              |
|----|--------------|--------------|--------------|
| C  | 1. 58330000  | 3. 46033900  | 1. 38679000  |
| C  | 2. 35165700  | 4. 63847100  | 1. 44744100  |
| C  | 3. 67225500  | 4. 59277500  | 1. 04762300  |
| C  | 4. 24639300  | 3. 38501400  | 0. 58727800  |
| C  | 3. 51643800  | 2. 21394400  | 0. 51218700  |
| C  | 0. 06791100  | 1. 82588100  | 1. 34187000  |
| C  | 0. 22660200  | 3. 15486100  | 1. 68853000  |
| H  | 1. 90737500  | 5. 56620700  | 1. 79744000  |
| H  | 4. 28147600  | 5. 49032000  | 1. 08223300  |
| H  | 5. 28748100  | 3. 38110200  | 0. 27856600  |
| H  | 3. 97071000  | 1. 30136000  | 0. 14030700  |
| N  | 1. 21412800  | 1. 26014700  | 0. 84748400  |
| H  | -0. 55615800 | 3. 82780500  | 2. 01202500  |
| C  | -1. 21137400 | 1. 15710800  | 1. 15952800  |
| O  | -2. 20313700 | 1. 22020000  | 1. 86130300  |
| C  | 3. 53633500  | -1. 05177100 | 1. 07984600  |
| C  | 2. 55916200  | -0. 67674100 | 2. 00723600  |
| C  | 2. 88276800  | -0. 42631800 | 3. 32401600  |
| C  | 4. 22351100  | -0. 55524500 | 3. 69036000  |
| C  | 5. 20244100  | -0. 92978500 | 2. 77695100  |
| C  | 4. 86626800  | -1. 18869300 | 1. 44408200  |
| C  | 1. 59424800  | -1. 11320400 | -0. 13606300 |
| C  | 1. 23951000  | -0. 63513000 | 1. 29342100  |
| H  | 2. 12350700  | -0. 13369100 | 4. 04137200  |
| H  | 6. 23179800  | -1. 02431200 | 3. 10275900  |
| H  | 5. 62690300  | -1. 49381700 | 0. 73375000  |
| N  | 2. 96158900  | -1. 23244800 | -0. 19267400 |
| O  | 0. 81689100  | -1. 38245000 | -1. 03183300 |
| C  | 3. 68294300  | -1. 67768200 | -1. 37164500 |
| H  | 4. 55436600  | -1. 02977400 | -1. 51899600 |
| H  | 2. 99933600  | -1. 52403700 | -2. 21230900 |
| C  | 4. 10165600  | -3. 12967600 | -1. 28442400 |
| C  | 5. 43518100  | -3. 50418800 | -1. 43486500 |
| C  | 3. 13390700  | -4. 11218900 | -1. 05576800 |
| C  | 5. 80378900  | -4. 84661500 | -1. 35523800 |
| H  | 6. 19052600  | -2. 74318300 | -1. 61577300 |
| C  | 3. 50039000  | -5. 45078300 | -0. 97440400 |
| H  | 2. 09181100  | -3. 81876000 | -0. 95016000 |
| C  | 4. 83750000  | -5. 82048000 | -1. 12304400 |
| H  | 6. 84545700  | -5. 12824800 | -1. 47081900 |
| H  | 2. 74355700  | -6. 20858000 | -0. 79901900 |
| H  | 5. 12287000  | -6. 86552300 | -1. 05876400 |
| O  | 0. 13093000  | -0. 89617100 | 1. 79399500  |
| Br | 4. 72114400  | -0. 20526700 | 5. 48831200  |

**H/H/4-Br/Bn****TS5(R)**

|   |             |              |              |
|---|-------------|--------------|--------------|
| C | 1. 90004000 | 1. 37382500  | 0. 29195800  |
| C | 3. 71412400 | 0. 60052600  | 1. 22128200  |
| C | 1. 74298300 | -0. 64380600 | 1. 91033000  |
| H | 0. 65821300 | -0. 52734200 | 1. 88845200  |
| N | 4. 12492000 | 1. 53681400  | 0. 41231700  |
| N | 2. 98414900 | 1. 99711800  | -0. 16863300 |
| N | 2. 35877500 | 0. 44806500  | 1. 15371500  |
| C | 4. 42308900 | -0. 16007300 | 2. 29800800  |
| H | 5. 36782400 | 0. 33069000  | 2. 53128000  |
| H | 4. 62034400 | -1. 19483800 | 1. 99617500  |
| C | 2. 28411900 | -0. 61270900 | 3. 37096300  |
| O | 3. 60201600 | -0. 07241600 | 3. 45296300  |
| C | 2. 42175400 | -2. 84467900 | 2. 51405300  |
| C | 2. 16599400 | -2. 01731100 | 1. 41655600  |
| C | 2. 30247800 | -2. 47773700 | 0. 11487300  |
| C | 2. 69135800 | -3. 80408700 | -0. 03477300 |
| C | 2. 92985500 | -4. 66170500 | 1. 03498700  |
| C | 2. 79322600 | -4. 17337600 | 2. 32969400  |
| C | 2. 24395000 | -2. 08705700 | 3. 80456000  |
| H | 2. 09407000 | -1. 85535300 | -0. 74566600 |
| H | 3. 22715600 | -5. 68487900 | 0. 84303400  |
| H | 2. 99167000 | -4. 81697900 | 3. 17991700  |
| H | 3. 01741300 | -2. 29595900 | 4. 54670300  |
| H | 1. 27120100 | -2. 31863400 | 4. 25350900  |
| C | 3. 06240600 | 3. 00443100  | -1. 19668800 |
| C | 2. 80821400 | 2. 61254000  | -2. 51431700 |
| C | 3. 42013000 | 4. 29880700  | -0. 82265200 |
| C | 2. 93018200 | 3. 59506500  | -3. 49249700 |
| C | 3. 52548000 | 5. 24283000  | -1. 84384600 |
| C | 3. 28465600 | 4. 90962900  | -3. 17679200 |
| H | 2. 74214200 | 3. 32740200  | -4. 52911800 |
| H | 3. 79866400 | 6. 26296100  | -1. 58755200 |
| C | 3. 66827300 | 4. 66072200  | 0. 61734000  |
| H | 4. 57305300 | 4. 17700900  | 0. 99588900  |
| H | 2. 83475500 | 4. 34392800  | 1. 25265700  |
| H | 3. 78476400 | 5. 74012100  | 0. 72223800  |
| C | 3. 37966300 | 5. 94955300  | -4. 26218800 |
| H | 3. 93623500 | 6. 82599000  | -3. 92477500 |
| H | 2. 38072900 | 6. 28024400  | -4. 56336600 |
| H | 3. 87198100 | 5. 54532600  | -5. 15009400 |
| C | 2. 40854500 | 1. 20191000  | -2. 85401100 |
| H | 3. 08038300 | 0. 47290100  | -2. 38846300 |

|   |             |             |             |
|---|-------------|-------------|-------------|
| H | 2.44132800  | 1.05088200  | -3.93389300 |
| H | 1.39177200  | 0.98625400  | -2.50622800 |
| H | 1.66621700  | 0.03244500  | 3.99790900  |
| N | 2.86108900  | -4.32557200 | -1.39769800 |
| O | 3.16361700  | -5.49933400 | -1.52482000 |
| O | 2.69348000  | -3.55558200 | -2.32655300 |
| C | -2.09690900 | 0.30934300  | 2.09009600  |
| C | -1.45816700 | 1.10275900  | 3.09306900  |
| C | -1.91852400 | 1.06365400  | 4.42357900  |
| C | -2.97694200 | 0.23539000  | 4.73896400  |
| C | -3.59694400 | -0.55708300 | 3.74582600  |
| C | -3.17468600 | -0.53371900 | 2.43023100  |
| C | -0.48291900 | 1.40163900  | 1.10963600  |
| C | -0.39850500 | 1.79326100  | 2.43340400  |
| H | -1.44707500 | 1.67867800  | 5.18529200  |
| H | -3.34429000 | 0.19138300  | 5.75948900  |
| H | -4.42901600 | -1.19715500 | 4.02309400  |
| H | -3.67116100 | -1.14007500 | 1.67934800  |
| N | -1.49853400 | 0.52246700  | 0.86956600  |
| H | 0.30858000  | 2.49258200  | 2.86102100  |
| C | 0.46425500  | 1.80842000  | 0.04386700  |
| O | 0.22559400  | 2.52857300  | -0.89154600 |
| C | -2.99824800 | -1.84681000 | -0.74847400 |
| C | -1.72291000 | -1.90803700 | -0.17031100 |
| C | -1.38268200 | -2.94353200 | 0.67666600  |
| C | -2.33330700 | -3.93078100 | 0.95741700  |
| C | -3.59198200 | -3.84132900 | 0.37352800  |
| C | -3.96323600 | -2.80818500 | -0.49031900 |
| C | -1.93860100 | -0.01389200 | -1.62808200 |
| C | -0.96706200 | -0.70533200 | -0.63538400 |
| H | -0.39268400 | -2.99120800 | 1.12214200  |
| H | -4.95770600 | -2.76448300 | -0.91848200 |
| N | -3.11802400 | -0.72841800 | -1.57949300 |
| O | -1.70988000 | 0.93726300  | -2.33940100 |
| C | -4.33370900 | -0.33567600 | -2.26047200 |
| H | -4.66657200 | -1.14436800 | -2.92124000 |
| H | -4.05691700 | 0.51608300  | -2.88929900 |
| C | -5.43478100 | 0.03790900  | -1.28780600 |
| C | -6.76364300 | -0.27664100 | -1.57259700 |
| C | -5.12679100 | 0.70129200  | -0.09838200 |
| C | -7.77667400 | 0.07666900  | -0.68382900 |
| H | -7.00617400 | -0.80524900 | -2.49116900 |
| C | -6.13744600 | 1.04397600  | 0.79533700  |
| H | -4.08975700 | 0.93514500  | 0.13451100  |



|               |             |             |             |
|---------------|-------------|-------------|-------------|
| C             | -7.46505200 | 0.73571800  | 0.50309600  |
| H             | -8.80757400 | -0.17351700 | -0.91368100 |
| H             | -5.88350100 | 1.54605200  | 1.72383200  |
| H             | -8.25279100 | 1.00137300  | 1.20078700  |
| O             | 0.26287800  | -0.57847500 | -0.73241900 |
| H             | -2.10033200 | -4.75667700 | 1.61834000  |
| Br            | -4.87296000 | -5.18769600 | 0.74864100  |
| <b>TS5(S)</b> |             |             |             |
| C             | -1.35851000 | 0.46681500  | -0.18489700 |
| C             | -1.96611900 | -0.87979700 | -1.77364500 |
| C             | -2.46384600 | -1.71336500 | 0.49474400  |
| H             | -1.96598300 | -1.55599100 | 1.45258700  |
| N             | -1.45093500 | 0.14733000  | -2.38876800 |
| N             | -1.07805700 | 0.98298800  | -1.37979700 |
| N             | -1.95147800 | -0.70373400 | -0.42200700 |
| C             | -2.41542200 | -2.21609000 | -2.26596500 |
| H             | -2.06765000 | -2.38135700 | -3.28495700 |
| H             | -3.51077800 | -2.29466200 | -2.24025800 |
| C             | -2.16473500 | -3.15191800 | -0.06286400 |
| O             | -1.79146100 | -3.17456400 | -1.43232300 |
| C             | -4.53355200 | -2.91405800 | 0.40789400  |
| C             | -3.97117500 | -1.65039700 | 0.58515000  |
| C             | -4.75099600 | -0.52504500 | 0.80474400  |
| C             | -6.12581800 | -0.72094200 | 0.83156400  |
| C             | -6.72366200 | -1.96744600 | 0.66080100  |
| C             | -5.91659500 | -3.07932100 | 0.44910200  |
| C             | -3.46278700 | -3.95196000 | 0.19660900  |
| H             | -4.31743400 | 0.45765700  | 0.95655700  |
| H             | -7.80277000 | -2.04871300 | 0.69148200  |
| H             | -6.36386000 | -4.05763100 | 0.30995000  |
| H             | -3.66948200 | -4.62275300 | -0.64176000 |
| H             | -3.35470400 | -4.57085700 | 1.09335900  |
| C             | -0.56063500 | 2.30471600  | -1.64074900 |
| C             | -1.39376700 | 3.39113900  | -1.35707400 |
| C             | 0.74313200  | 2.44652300  | -2.12943300 |
| C             | -0.85770900 | 4.66836200  | -1.51884900 |
| C             | 1.22494400  | 3.74535900  | -2.27132900 |
| C             | 0.45402700  | 4.86261800  | -1.94775900 |
| H             | -1.48268800 | 5.52926000  | -1.29570100 |
| H             | 2.24279300  | 3.88412000  | -2.62884100 |
| C             | 1.62707300  | 1.27676500  | -2.46527300 |
| H             | 1.05842800  | 0.38359800  | -2.72393800 |
| H             | 2.25529000  | 1.03423400  | -1.60134200 |
| H             | 2.28294900  | 1.53760300  | -3.29893400 |

|   |             |             |             |
|---|-------------|-------------|-------------|
| C | 1.04411900  | 6.24385600  | -2.05130700 |
| H | 0.28069900  | 7.01444000  | -1.92850500 |
| H | 1.53528300  | 6.39157800  | -3.01676000 |
| H | 1.80067300  | 6.38511800  | -1.27260700 |
| C | -2.81349100 | 3.21631000  | -0.87832200 |
| H | -3.29203900 | 2.34052800  | -1.32639000 |
| H | -3.40489300 | 4.09497300  | -1.14076900 |
| H | -2.85999500 | 3.10297500  | 0.21022300  |
| H | -1.30658000 | -3.57416900 | 0.46018600  |
| N | -6.99033200 | 0.44617100  | 1.04476200  |
| O | -8.19456500 | 0.26349700  | 1.09028200  |
| O | -6.45662600 | 1.53533700  | 1.16201100  |
| C | 2.16370900  | 2.24682100  | 0.90127000  |
| C | 1.58271700  | 3.46080700  | 1.38288800  |
| C | 2.35021500  | 4.63955700  | 1.44050800  |
| C | 3.67185100  | 4.59306400  | 1.04400400  |
| C | 4.24752600  | 3.38394900  | 0.58956100  |
| C | 3.51823400  | 2.21218100  | 0.51730100  |
| C | 0.06753300  | 1.82592200  | 1.34227700  |
| C | 0.22522900  | 3.15613300  | 1.68305800  |
| H | 1.90437400  | 5.56846200  | 1.78544500  |
| H | 4.28046200  | 5.49110400  | 1.07637100  |
| H | 5.28925000  | 3.37909200  | 0.28311200  |
| H | 3.97415400  | 1.29900100  | 0.14912300  |
| N | 1.21503900  | 1.25868000  | 0.85272600  |
| H | -0.55849600 | 3.83034400  | 2.00155100  |
| C | -1.21131200 | 1.15541200  | 1.16014000  |
| O | -2.20285300 | 1.21853100  | 1.86206800  |
| C | 3.53553200  | -1.05239800 | 1.07706400  |
| C | 2.55934000  | -0.67699300 | 2.00636000  |
| C | 2.89630600  | -0.43316400 | 3.32140200  |
| C | 4.23378300  | -0.55779500 | 3.71110600  |
| C | 5.18235600  | -0.92949500 | 2.76571900  |
| C | 4.86806500  | -1.19192300 | 1.42969300  |
| C | 1.59507600  | -1.10749100 | -0.13789700 |
| C | 1.24171100  | -0.62602300 | 1.29115500  |
| H | 2.13362400  | -0.14212000 | 4.03693800  |
| H | 5.63176700  | -1.49593300 | 0.72350500  |
| N | 2.96328200  | -1.23045600 | -0.19540200 |
| O | 0.81873200  | -1.37697700 | -1.03406200 |
| C | 3.68329200  | -1.67958400 | -1.37399800 |
| H | 4.55561500  | -1.03333400 | -1.52344700 |
| H | 2.99917600  | -1.52634300 | -2.21426500 |
| C | 4.09924900  | -3.13208900 | -1.28327000 |

|    |            |             |             |
|----|------------|-------------|-------------|
| C  | 5.43298800 | -3.50861700 | -1.42623500 |
| C  | 3.12887700 | -4.11269200 | -1.05734000 |
| C  | 5.79931600 | -4.85137300 | -1.34182200 |
| H  | 6.19039700 | -2.74915100 | -1.60493000 |
| C  | 3.49311100 | -5.45159600 | -0.97142000 |
| H  | 2.08673800 | -3.81739500 | -0.95729900 |
| C  | 4.83047900 | -5.82335600 | -1.11255600 |
| H  | 6.84121400 | -5.13460800 | -1.45097200 |
| H  | 2.73442600 | -6.20802700 | -0.79815100 |
| H  | 5.11409900 | -6.86862700 | -1.04439500 |
| O  | 0.13035700 | -0.88984300 | 1.78920200  |
| H  | 4.53538400 | -0.36837200 | 4.73411600  |
| Br | 6.99281700 | -1.08625500 | 3.30781400  |

**Et/H/H/Bn**

**R1**

|   |             |             |             |
|---|-------------|-------------|-------------|
| C | -0.20458500 | 1.13149600  | -0.45858200 |
| C | -1.52313700 | 1.32286200  | 0.03027200  |
| C | -1.93983200 | 2.61809200  | 0.39742400  |
| C | -1.05021900 | 3.66401400  | 0.26869300  |
| C | 0.25980000  | 3.45065000  | -0.22355100 |
| C | 0.70145900  | 2.19582700  | -0.59182700 |
| C | -1.23466800 | -0.85733400 | -0.43107000 |
| C | -2.17055500 | 0.04759700  | 0.03590400  |
| H | -2.94323600 | 2.78439900  | 0.77842700  |
| H | -1.35135800 | 4.66806600  | 0.54796900  |
| H | 0.93384700  | 4.29660700  | -0.31246000 |
| H | 1.70572600  | 2.03538700  | -0.96949800 |
| N | -0.05452100 | -0.19560100 | -0.73407000 |
| H | 0.78334500  | -0.63018800 | -1.09063100 |
| C | -1.36279600 | -2.29273300 | -0.63209700 |
| H | -0.47985500 | -2.78997900 | -1.08181000 |
| O | -2.35544700 | -2.93515200 | -0.34002300 |
| C | -3.56373000 | -0.25390900 | 0.49755300  |
| H | -4.02140400 | -0.97798700 | -0.18204400 |
| H | -4.15948300 | 0.66373400  | 0.45133900  |
| C | -3.58534200 | -0.81957000 | 1.92213700  |
| H | -3.12582400 | -0.11884300 | 2.62490700  |
| H | -3.02958200 | -1.75984300 | 1.95560100  |
| H | -4.61042900 | -1.01288600 | 2.24906000  |

**si-M2**

|   |             |             |            |
|---|-------------|-------------|------------|
| C | -4.73399200 | -6.18888000 | 0.96775800 |
| C | -5.84966900 | -7.84305400 | 1.97535600 |
| C | -6.43245700 | -5.60762200 | 2.82271300 |
| H | -5.85420400 | -4.72768500 | 3.09552000 |

|   |              |             |             |
|---|--------------|-------------|-------------|
| N | -5.24631100  | -8.44154600 | 1.01328200  |
| N | -4.54689800  | -7.42884400 | 0.35826500  |
| N | -5.56801200  | -6.49687200 | 2.05218000  |
| C | -6.77832700  | -8.41216100 | 2.99691600  |
| H | -6.54492100  | -9.46027800 | 3.18432600  |
| H | -7.81901800  | -8.34254200 | 2.64657000  |
| C | -6.97575600  | -6.33460600 | 4.11059400  |
| O | -6.59156600  | -7.69471900 | 4.20119500  |
| C | -8.83875900  | -5.56406800 | 2.74325900  |
| C | -7.67627800  | -5.23351300 | 2.04818100  |
| C | -7.72620800  | -4.67021300 | 0.77998800  |
| C | -8.98668600  | -4.47146100 | 0.23268200  |
| C | -10.16821800 | -4.78880500 | 0.89951300  |
| C | -10.09197500 | -5.33797900 | 2.17376600  |
| C | -8.51591100  | -6.15021500 | 4.09142500  |
| H | -6.83149500  | -4.39781800 | 0.23231300  |
| H | -11.11978800 | -4.60731400 | 0.41611600  |
| H | -10.99960400 | -5.59436400 | 2.70994300  |
| H | -9.01715800  | -7.10728100 | 4.26826300  |
| H | -8.83158900  | -5.47418100 | 4.89173400  |
| C | -4.03346200  | -7.67215800 | -0.94450700 |
| C | -4.63039100  | -7.06566500 | -2.05628400 |
| C | -2.89670200  | -8.48497400 | -1.06655000 |
| C | -4.00058900  | -7.21441500 | -3.29388900 |
| C | -2.31747100  | -8.62137100 | -2.32450600 |
| C | -2.83546400  | -7.96304400 | -3.44317800 |
| H | -4.43723200  | -6.72795700 | -4.16348200 |
| H | -1.42312300  | -9.23182100 | -2.43023700 |
| C | -2.30486800  | -9.15650200 | 0.14473700  |
| H | -2.97088200  | -9.93604900 | 0.52567300  |
| H | -2.16612400  | -8.44463300 | 0.96612300  |
| H | -1.34025800  | -9.60753900 | -0.09508000 |
| C | -2.12469500  | -8.02829400 | -4.76884900 |
| H | -2.81623800  | -7.87130700 | -5.59990200 |
| H | -1.62554900  | -8.99040900 | -4.90794500 |
| H | -1.35998100  | -7.24440100 | -4.81734700 |
| C | -5.90823600  | -6.27884000 | -1.93993300 |
| H | -6.55158200  | -6.67888200 | -1.14955800 |
| H | -6.45833100  | -6.30745600 | -2.88306300 |
| H | -5.70562600  | -5.22971400 | -1.70150200 |
| H | -6.53861600  | -5.87290100 | 4.99580800  |
| N | -9.07380400  | -3.90398100 | -1.11736000 |
| O | -10.18241500 | -3.71309700 | -1.58701300 |
| O | -8.03194800  | -3.65628900 | -1.70188900 |

|   |             |             |             |
|---|-------------|-------------|-------------|
| C | -1.46447400 | -5.03588700 | -1.73868200 |
| C | -2.19427200 | -3.94829100 | -2.28170800 |
| C | -1.72198900 | -3.33930600 | -3.45752200 |
| C | -0.56737300 | -3.82438600 | -4.05040000 |
| C | 0.13707300  | -4.91156000 | -3.49346200 |
| C | -0.30148900 | -5.53229600 | -2.33405000 |
| C | -3.29089700 | -4.71189500 | -0.45959000 |
| C | -3.35453500 | -3.75751900 | -1.45688200 |
| H | -2.26084900 | -2.50511700 | -3.89932000 |
| H | -0.19623400 | -3.36477300 | -4.96104800 |
| H | 1.03713400  | -5.27032300 | -3.98307300 |
| H | 0.22653000  | -6.37947800 | -1.90685400 |
| N | -2.12556500 | -5.44637000 | -0.61247500 |
| H | -1.87189400 | -6.23884100 | -0.04385100 |
| C | -4.23004000 | -4.96902400 | 0.62379400  |
| H | -4.04278500 | -3.35617800 | 1.66971300  |
| O | -4.77037100 | -3.84746800 | 1.26561800  |
| C | -4.43035900 | -2.73312900 | -1.65904600 |
| C | -4.04875700 | -1.35623100 | -1.10492000 |
| H | -5.35625500 | -3.06905900 | -1.17873800 |
| H | -4.64662800 | -2.64794300 | -2.73140300 |
| H | -4.83006900 | -0.61654500 | -1.30095300 |
| H | -3.89802000 | -1.41780600 | -0.02338100 |
| H | -3.11717100 | -0.99947000 | -1.55475200 |

**TS5(S)**

|   |             |             |             |
|---|-------------|-------------|-------------|
| C | -1.34311400 | 0.50313700  | -0.23504200 |
| C | -1.96995000 | -0.88845700 | -1.77699100 |
| C | -2.42562600 | -1.66403800 | 0.52065800  |
| H | -1.91235000 | -1.47850800 | 1.46524200  |
| N | -1.47312300 | 0.12499000  | -2.42934600 |
| N | -1.09150800 | 0.98891200  | -1.44852200 |
| N | -1.93336000 | -0.67645100 | -0.43017600 |
| C | -2.41694300 | -2.24071400 | -2.22561800 |
| H | -2.08429900 | -2.43109600 | -3.24534900 |
| H | -3.51121000 | -2.32644100 | -2.18079500 |
| C | -2.12727400 | -3.11530200 | -0.00308400 |
| O | -1.77336800 | -3.17226500 | -1.37663400 |
| C | -4.49088400 | -2.87611600 | 0.49409800  |
| C | -3.93155300 | -1.60631300 | 0.63257300  |
| C | -4.71253700 | -0.47934800 | 0.83866500  |
| C | -6.08600700 | -0.67957600 | 0.88944700  |
| C | -6.68116800 | -1.93189600 | 0.75533300  |
| C | -5.87259300 | -3.04546700 | 0.55846800  |
| C | -3.41793300 | -3.91434400 | 0.29494500  |

|   |             |             |             |
|---|-------------|-------------|-------------|
| H | -4.27992300 | 0.50775600  | 0.96399600  |
| H | -7.75945900 | -2.01646700 | 0.80245900  |
| H | -6.31780000 | -4.02836400 | 0.44793100  |
| H | -3.63223000 | -4.60852200 | -0.52219500 |
| H | -3.29456500 | -4.50843300 | 1.20642700  |
| C | -0.58839000 | 2.31267400  | -1.72001000 |
| C | -1.45405900 | 3.38406200  | -1.47102200 |
| C | 0.73615700  | 2.47437800  | -2.13167300 |
| C | -0.92350800 | 4.66849200  | -1.56570700 |
| C | 1.21493100  | 3.78174300  | -2.20365000 |
| C | 0.41684400  | 4.88192500  | -1.89362300 |
| H | -1.57017300 | 5.51932100  | -1.36625000 |
| H | 2.25300900  | 3.93763500  | -2.48969600 |
| C | 1.63735700  | 1.32107400  | -2.47910500 |
| H | 1.08479600  | 0.39464100  | -2.63165700 |
| H | 2.35754200  | 1.15491800  | -1.67118300 |
| H | 2.19728300  | 1.55542100  | -3.38814600 |
| C | 1.00545600  | 6.26709400  | -1.88655100 |
| H | 0.22776700  | 7.03346300  | -1.90582500 |
| H | 1.66980300  | 6.42140200  | -2.74053900 |
| H | 1.60078400  | 6.40749800  | -0.97727000 |
| C | -2.90669800 | 3.16443400  | -1.12555200 |
| H | -3.35870500 | 2.41250600  | -1.78001400 |
| H | -3.46263100 | 4.09589500  | -1.24232700 |
| H | -3.04141400 | 2.82714000  | -0.09238700 |
| H | -1.25969700 | -3.51942800 | 0.51886700  |
| N | -6.95187800 | 0.48894300  | 1.08841200  |
| O | -8.15459700 | 0.30308500  | 1.15646700  |
| O | -6.42088200 | 1.58255400  | 1.17187700  |
| C | 2.21975200  | 2.27574100  | 0.83557200  |
| C | 1.65163300  | 3.50589700  | 1.28578100  |
| C | 2.43453900  | 4.67265100  | 1.35532100  |
| C | 3.76518600  | 4.60245600  | 0.99190300  |
| C | 4.32911900  | 3.37864400  | 0.56275100  |
| C | 3.58278100  | 2.21728300  | 0.48461900  |
| C | 0.10927400  | 1.90162300  | 1.24295700  |
| C | 0.27529600  | 3.24440300  | 1.55710300  |
| H | 1.99604100  | 5.61095300  | 1.68732900  |
| H | 4.38878000  | 5.48975700  | 1.03300400  |
| H | 5.37799200  | 3.35276300  | 0.28230300  |
| H | 4.03355300  | 1.29213300  | 0.14108600  |
| N | 1.25663500  | 1.30468500  | 0.78067900  |
| C | -1.17733900 | 1.25541200  | 1.07396800  |
| O | -2.17783400 | 1.39364800  | 1.75894000  |

|   |             |             |             |
|---|-------------|-------------|-------------|
| C | 3.54818400  | -1.03543700 | 1.06377100  |
| C | 2.58015000  | -0.63159000 | 1.98897800  |
| C | 2.92309800  | -0.37491800 | 3.30152500  |
| C | 4.26134800  | -0.52099400 | 3.68274200  |
| C | 5.21778900  | -0.92250400 | 2.75243400  |
| C | 4.87782500  | -1.19096400 | 1.42109500  |
| C | 1.60117800  | -1.08338800 | -0.14560900 |
| C | 1.26110900  | -0.57630200 | 1.27782300  |
| H | 2.16275700  | -0.06201900 | 4.01084900  |
| H | 4.55721400  | -0.32322800 | 4.70732100  |
| H | 6.25138300  | -1.03550100 | 3.06337400  |
| H | 5.62558000  | -1.51732300 | 0.70608500  |
| N | 2.96417800  | -1.22352000 | -0.20676600 |
| O | 0.81467600  | -1.35779200 | -1.03420900 |
| C | 3.67220100  | -1.69667800 | -1.38139500 |
| H | 4.55145500  | -1.06326000 | -1.54510000 |
| H | 2.98594700  | -1.54931900 | -2.22107100 |
| C | 4.07504800  | -3.15208400 | -1.27366400 |
| C | 5.40316300  | -3.54337600 | -1.42911100 |
| C | 3.09972900  | -4.12053700 | -1.01903500 |
| C | 5.75926800  | -4.88772100 | -1.32886400 |
| H | 6.16451300  | -2.79291900 | -1.62818800 |
| C | 3.45358500  | -5.46133900 | -0.91712900 |
| H | 2.06175800  | -3.81411400 | -0.90910300 |
| C | 4.78545800  | -5.84743800 | -1.07071600 |
| H | 6.79710600  | -5.18197500 | -1.44784800 |
| H | 2.69081800  | -6.20828300 | -0.72154900 |
| H | 5.06076600  | -6.89404600 | -0.98967300 |
| O | 0.14657800  | -0.80837600 | 1.78425300  |
| C | -0.76281500 | 4.22525700  | 2.00159300  |
| C | -0.87717000 | 4.29079700  | 3.52916400  |
| H | -1.73714500 | 3.94743100  | 1.58256100  |
| H | -0.51330800 | 5.21453700  | 1.59929200  |
| H | -1.61652600 | 5.03499000  | 3.83751400  |
| H | -1.18095200 | 3.31612600  | 3.91975700  |
| H | 0.08515000  | 4.55324500  | 3.97812200  |

**Bn/H/H/Bn**

**R1**

|   |             |            |             |
|---|-------------|------------|-------------|
| C | -0.31574500 | 1.00018000 | -0.46573100 |
| C | -1.59761300 | 1.25660900 | 0.08686800  |
| C | -1.94319300 | 2.57728000 | 0.43924900  |
| C | -1.02052100 | 3.58228100 | 0.23714800  |
| C | 0.25308200  | 3.30305300 | -0.31378700 |
| C | 0.62420700  | 2.02270400 | -0.67157300 |

|              |             |             |             |
|--------------|-------------|-------------|-------------|
| C            | -1.42292000 | -0.94337400 | -0.34587700 |
| C            | -2.29149300 | 0.00856200  | 0.15424500  |
| H            | -2.92017900 | 2.79604100  | 0.86166800  |
| H            | -1.26808800 | 4.60474000  | 0.50187000  |
| H            | 0.95523300  | 4.11761800  | -0.45886100 |
| H            | 1.60053800  | 1.81198000  | -1.09496200 |
| N            | -0.23476500 | -0.33730400 | -0.72011300 |
| H            | 0.56197500  | -0.81168700 | -1.11820800 |
| C            | -1.62208100 | -2.37499700 | -0.52165300 |
| H            | -0.76930200 | -2.91889900 | -0.97480000 |
| O            | -2.64022400 | -2.96497100 | -0.21027300 |
| C            | -3.66744300 | -0.22883800 | 0.70684700  |
| H            | -4.18902700 | -0.96607900 | 0.09214500  |
| H            | -4.23256200 | 0.70857700  | 0.65529300  |
| C            | -3.62624700 | -0.71525200 | 2.14401400  |
| C            | -3.14712900 | 0.12219900  | 3.15613400  |
| C            | -4.05320200 | -2.00055200 | 2.47855000  |
| C            | -3.10381600 | -0.31262500 | 4.47674800  |
| H            | -2.80251600 | 1.12228700  | 2.90196300  |
| C            | -4.01120400 | -2.43883200 | 3.80161800  |
| H            | -4.40732200 | -2.66071500 | 1.69284300  |
| C            | -3.53811600 | -1.59688300 | 4.80394600  |
| H            | -2.73236400 | 0.35069600  | 5.25175400  |
| H            | -4.34733100 | -3.44148300 | 4.04753200  |
| H            | -3.50579700 | -1.93778200 | 5.83390300  |
| <b>si-M2</b> |             |             |             |
| C            | -4.63037100 | -6.24055900 | 0.90708500  |
| C            | -5.81946600 | -7.80561000 | 1.96878800  |
| C            | -6.21931900 | -5.52263200 | 2.81501700  |
| H            | -5.55602900 | -4.70287100 | 3.08244900  |
| N            | -5.29014400 | -8.45209200 | 0.99363000  |
| N            | -4.55077900 | -7.49428700 | 0.30298300  |
| N            | -5.45286500 | -6.47912300 | 2.01896400  |
| C            | -6.74318300 | -8.31119800 | 3.02683600  |
| H            | -6.55624100 | -9.36705600 | 3.22275100  |
| H            | -7.78909300 | -8.19474400 | 2.70616600  |
| C            | -6.79756400 | -6.21153400 | 4.11007500  |
| O            | -6.48488200 | -7.58828100 | 4.21406500  |
| C            | -8.61723500 | -5.29107300 | 2.77758500  |
| C            | -7.44230300 | -5.02550300 | 2.07508400  |
| C            | -7.46950500 | -4.39918900 | 0.83521100  |
| C            | -8.71851100 | -4.07463700 | 0.32384600  |
| C            | -9.91163400 | -4.33163600 | 0.99640500  |
| C            | -9.85781100 | -4.94338600 | 2.24245700  |



|   |              |              |             |
|---|--------------|--------------|-------------|
| C | -8.32569800  | -5.94447400  | 4.10117700  |
| H | -6.56382000  | -4.15639300  | 0.29227500  |
| H | -10.85313600 | -4.05071300  | 0.54148400  |
| H | -10.77378500 | -5.14981500  | 2.78603000  |
| H | -8.88012500  | -6.87790000  | 4.24282500  |
| H | -8.60492700  | -5.28391000  | 4.92727900  |
| C | -4.10276100  | -7.76679900  | -1.01584100 |
| C | -4.69302000  | -7.10926400  | -2.10272200 |
| C | -3.02034900  | -8.64353600  | -1.17964100 |
| C | -4.10116800  | -7.26790800  | -3.35688600 |
| C | -2.48084500  | -8.79015000  | -2.45468800 |
| C | -2.98504300  | -8.08062600  | -3.54792600 |
| H | -4.52982100  | -6.74218400  | -4.20740500 |
| H | -1.63006800  | -9.45344000  | -2.59485800 |
| C | -2.43932000  | -9.36553000  | 0.00779400  |
| H | -3.16272800  | -10.06849700 | 0.43013600  |
| H | -2.18574000  | -8.66556900  | 0.81204400  |
| H | -1.53937200  | -9.91433900  | -0.27496300 |
| C | -2.31535400  | -8.16452000  | -4.89375600 |
| H | -3.03039200  | -8.00739300  | -5.70470400 |
| H | -1.83122900  | -9.13320200  | -5.03896600 |
| H | -1.54480600  | -7.38899800  | -4.97351300 |
| C | -5.92069400  | -6.25340200  | -1.93784200 |
| H | -6.55615500  | -6.62298400  | -1.12674400 |
| H | -6.50355800  | -6.24612200  | -2.86148500 |
| H | -5.65337100  | -5.21849900  | -1.70018400 |
| H | -6.33156300  | -5.76341200  | 4.98745900  |
| N | -8.78067900  | -3.42472200  | -0.98915800 |
| O | -9.87661700  | -3.12714000  | -1.42985100 |
| O | -7.72995900  | -3.21712500  | -1.57685000 |
| C | -1.45355200  | -5.18297900  | -2.00936800 |
| C | -2.12032500  | -3.99856000  | -2.41317400 |
| C | -1.65706500  | -3.31381200  | -3.55004500 |
| C | -0.57647900  | -3.82593300  | -4.24866300 |
| C | 0.06127800   | -5.01398700  | -3.83652100 |
| C | -0.36688300  | -5.70795000  | -2.71476300 |
| C | -3.17097400  | -4.83275200  | -0.59290900 |
| C | -3.21217100  | -3.79334000  | -1.50657100 |
| H | -2.14380000  | -2.39881200  | -3.87738900 |
| H | -0.21258200  | -3.30855400  | -5.13070700 |
| H | 0.90335400   | -5.39201500  | -4.40783700 |
| H | 0.11357300   | -6.62865300  | -2.39740500 |
| N | -2.08272500  | -5.63690900  | -0.88020300 |
| H | -1.85896100  | -6.49199200  | -0.39621700 |

|   |             |             |             |
|---|-------------|-------------|-------------|
| C | -4.05681200 | -5.05975000 | 0.53803900  |
| H | -3.77742900 | -3.28828700 | 1.26403400  |
| O | -4.51203300 | -3.91402000 | 1.19779500  |
| C | -4.23839200 | -2.69954200 | -1.57146600 |
| H | -5.24040800 | -3.10605700 | -1.39053900 |
| H | -4.25658600 | -2.30207000 | -2.59466200 |
| C | -4.01890100 | -1.54768800 | -0.60702800 |
| C | -2.73563900 | -1.07839100 | -0.31485700 |
| C | -5.11514900 | -0.93134700 | 0.00297700  |
| C | -2.55306200 | -0.00872600 | 0.56001500  |
| H | -1.87761300 | -1.56096900 | -0.77659700 |
| C | -4.93592900 | 0.13728600  | 0.87715500  |
| H | -6.11445600 | -1.30659100 | -0.20801900 |
| C | -3.65262600 | 0.60299900  | 1.15806600  |
| H | -1.54970300 | 0.34560900  | 0.77597500  |
| H | -5.79780300 | 0.60211500  | 1.34613300  |
| H | -3.51042700 | 1.43224700  | 1.84368900  |

**TS5(S)**

|   |             |             |             |
|---|-------------|-------------|-------------|
| C | -1.32043000 | 0.55339400  | -0.23110500 |
| C | -1.97947800 | -0.87335700 | -1.72630300 |
| C | -2.41040800 | -1.58393400 | 0.59698900  |
| H | -1.88361000 | -1.37755400 | 1.52985800  |
| N | -1.48350900 | 0.11858800  | -2.41211300 |
| N | -1.08138400 | 1.00448900  | -1.46015300 |
| N | -1.92345600 | -0.62571000 | -0.38633000 |
| C | -2.44270300 | -2.23336500 | -2.13281500 |
| H | -2.12536800 | -2.45338100 | -3.15143400 |
| H | -3.53689100 | -2.30931000 | -2.07143900 |
| C | -2.12846300 | -3.05061600 | 0.10864000  |
| O | -1.79432800 | -3.14658300 | -1.26774300 |
| C | -4.48317100 | -2.78223100 | 0.63147700  |
| C | -3.91449500 | -1.51260600 | 0.72590900  |
| C | -4.68619000 | -0.37527200 | 0.90928900  |
| C | -6.05992600 | -0.56546400 | 0.98488100  |
| C | -6.66402500 | -1.81744500 | 0.89654600  |
| C | -5.86469500 | -2.94110100 | 0.72025900  |
| C | -3.41968800 | -3.83274300 | 0.44606800  |
| H | -4.24741200 | 0.61293400  | 0.99967500  |
| H | -7.74201900 | -1.89416000 | 0.96130600  |
| H | -6.31690500 | -3.92403700 | 0.64354200  |
| H | -3.64946000 | -4.54714600 | -0.34908300 |
| H | -3.28730700 | -4.40279000 | 1.37151100  |
| C | -0.57901800 | 2.31927900  | -1.77150200 |
| C | -1.43647900 | 3.39857800  | -1.53266500 |

|   |             |             |             |
|---|-------------|-------------|-------------|
| C | 0.74092600  | 2.46595300  | -2.20601500 |
| C | -0.90221200 | 4.67914000  | -1.66383100 |
| C | 1.22412200  | 3.76870300  | -2.31016000 |
| C | 0.43411900  | 4.87932100  | -2.01297200 |
| H | -1.54303200 | 5.53671300  | -1.47423800 |
| H | 2.25934400  | 3.91455000  | -2.61180100 |
| C | 1.63014300  | 1.29939600  | -2.54043200 |
| H | 1.06992700  | 0.37290500  | -2.66147700 |
| H | 2.36234000  | 1.14751500  | -1.74070600 |
| H | 2.17623000  | 1.50824100  | -3.46396400 |
| C | 1.03016600  | 6.26098600  | -2.04926500 |
| H | 0.26156600  | 7.03120500  | -1.95935600 |
| H | 1.58545900  | 6.42942100  | -2.97581300 |
| H | 1.73398400  | 6.37937500  | -1.21803800 |
| C | -2.88232500 | 3.19571700  | -1.15037300 |
| H | -3.32703300 | 2.35904200  | -1.69783900 |
| H | -3.45750800 | 4.09441200  | -1.37850000 |
| H | -3.00251100 | 2.99218900  | -0.08071500 |
| H | -1.25602500 | -3.44601300 | 0.62921000  |
| N | -6.91597800 | 0.61411500  | 1.16045800  |
| O | -8.11781700 | 0.43724400  | 1.25948100  |
| O | -6.37789900 | 1.70690800  | 1.19412800  |
| C | 2.27294000  | 2.32681300  | 0.73730500  |
| C | 1.72545300  | 3.57379900  | 1.16286400  |
| C | 2.52001700  | 4.73410200  | 1.18818800  |
| C | 3.84332300  | 4.63977900  | 0.80359500  |
| C | 4.38773400  | 3.39907600  | 0.39856500  |
| C | 3.62886000  | 2.24357800  | 0.36591800  |
| C | 0.16467400  | 1.98384900  | 1.18443400  |
| C | 0.35126800  | 3.33255100  | 1.45847900  |
| H | 2.09719700  | 5.68452200  | 1.50547800  |
| H | 4.47667100  | 5.52100700  | 0.81213600  |
| H | 5.43139000  | 3.35482100  | 0.10163600  |
| H | 4.06396900  | 1.30400600  | 0.04174800  |
| N | 1.29929500  | 1.36451000  | 0.72319700  |
| C | -1.12700800 | 1.33257400  | 1.05741500  |
| O | -2.11069200 | 1.47448800  | 1.76575300  |
| C | 3.57468600  | -0.99234800 | 1.04844500  |
| C | 2.62112000  | -0.55205500 | 1.97215900  |
| C | 2.98151000  | -0.25668100 | 3.27186100  |
| C | 4.32252400  | -0.40416900 | 3.64226100  |
| C | 5.26416000  | -0.84457900 | 2.71424000  |
| C | 4.90675300  | -1.15014000 | 1.39552200  |
| C | 1.61394000  | -1.05455900 | -0.13832600 |

|   |              |              |              |
|---|--------------|--------------|--------------|
| C | 1. 29506800  | -0. 50846500 | 1. 27528100  |
| H | 2. 23285400  | 0. 08816800  | 3. 97877100  |
| H | 4. 63225600  | -0. 17657900 | 4. 65643600  |
| H | 6. 30008000  | -0. 95842000 | 3. 01702700  |
| H | 5. 64283300  | -1. 50565800 | 0. 68233100  |
| N | 2. 97444000  | -1. 21172300 | -0. 20975600 |
| O | 0. 81427400  | -1. 34140500 | -1. 01097200 |
| C | 3. 66421800  | -1. 72621800 | -1. 37758600 |
| H | 4. 54030100  | -1. 09942300 | -1. 57903800 |
| H | 2. 96423800  | -1. 60885400 | -2. 21070400 |
| C | 4. 07127900  | -3. 17665300 | -1. 22445800 |
| C | 5. 39282900  | -3. 57442200 | -1. 41657400 |
| C | 3. 10896300  | -4. 13353600 | -0. 89081800 |
| C | 5. 75459900  | -4. 91353900 | -1. 27564900 |
| H | 6. 14467600  | -2. 83275200 | -1. 67611000 |
| C | 3. 46857400  | -5. 46909600 | -0. 74767300 |
| H | 2. 07565100  | -3. 82391200 | -0. 75067100 |
| C | 4. 79365800  | -5. 86160300 | -0. 93868500 |
| H | 6. 78735800  | -5. 21239600 | -1. 42397500 |
| H | 2. 71541400  | -6. 20672900 | -0. 48914300 |
| H | 5. 07359800  | -6. 90388200 | -0. 82464700 |
| O | 0. 18410800  | -0. 71359400 | 1. 79932100  |
| C | -0. 66600300 | 4. 35137700  | 1. 87322700  |
| H | -1. 66925800 | 3. 99276900  | 1. 61502700  |
| H | -0. 49713200 | 5. 27874800  | 1. 31284600  |
| C | -0. 60850300 | 4. 64039000  | 3. 36207400  |
| C | -0. 21189700 | 5. 88762900  | 3. 84263800  |
| C | -0. 94349100 | 3. 63728600  | 4. 27680300  |
| C | -0. 15019100 | 6. 13398800  | 5. 21419100  |
| H | 0. 04694100  | 6. 67499500  | 3. 13863500  |
| C | -0. 88693300 | 3. 88136700  | 5. 64459700  |
| H | -1. 25409800 | 2. 66589600  | 3. 89878200  |
| C | -0. 48776900 | 5. 13181700  | 6. 11824800  |
| H | 0. 16221000  | 7. 10967100  | 5. 57347400  |
| H | -1. 15426300 | 3. 09572000  | 6. 34474800  |
| H | -0. 44138800 | 5. 32156300  | 7. 18589500  |

**H/Me/H/Bn**

**R1**

|   |              |             |              |
|---|--------------|-------------|--------------|
| C | -0. 23585400 | 1. 06483400 | -0. 45143000 |
| C | -1. 54377600 | 1. 19695800 | 0. 08095900  |
| C | -1. 96907500 | 2. 45660400 | 0. 55490300  |
| C | -1. 11067500 | 3. 53578100 | 0. 49581400  |
| C | 0. 19368000  | 3. 36523000 | -0. 04489500 |
| C | 0. 64797300  | 2. 15396300 | -0. 51933600 |

|   |             |             |             |
|---|-------------|-------------|-------------|
| C | -1.22994500 | -0.93586200 | -0.56639500 |
| C | -2.15601300 | -0.08643400 | -0.00289700 |
| H | -2.96867900 | 2.57343400  | 0.96480000  |
| H | 0.85280000  | 4.22867800  | -0.08238900 |
| H | 1.64618500  | 2.04457200  | -0.92995800 |
| N | -0.07012100 | -0.23599900 | -0.83687000 |
| H | 0.76525000  | -0.62502300 | -1.24828300 |
| H | -3.15111900 | -0.37081900 | 0.30634600  |
| C | -1.35540400 | -2.35896500 | -0.86774900 |
| H | -0.46304000 | -2.83098900 | -1.32461500 |
| O | -2.35917000 | -3.00463500 | -0.64096600 |
| C | -1.52389000 | 4.89699900  | 0.99575800  |
| H | -0.89470000 | 5.21683500  | 1.83246100  |
| H | -1.42507900 | 5.65185400  | 0.20967400  |
| H | -2.56175900 | 4.89424500  | 1.33531200  |

**si-M2**

|   |              |             |             |
|---|--------------|-------------|-------------|
| C | -4.68054200  | -6.34296600 | 0.88834900  |
| C | -5.81301800  | -7.92010600 | 1.99690900  |
| C | -6.38430600  | -5.64155900 | 2.71025900  |
| H | -5.81158600  | -4.74006400 | 2.91367700  |
| N | -5.20578700  | -8.58515100 | 1.08174400  |
| N | -4.49750100  | -7.62106700 | 0.36781300  |
| N | -5.52587500  | -6.57386200 | 1.98503900  |
| C | -6.74517600  | -8.41800100 | 3.05156100  |
| H | -6.52754300  | -9.45888500 | 3.29075300  |
| H | -7.78737800  | -8.34790700 | 2.70562900  |
| C | -6.89571900  | -6.28142800 | 4.05608500  |
| O | -6.53446500  | -7.64189900 | 4.21438900  |
| C | -8.79065200  | -5.60690900 | 2.68448200  |
| C | -7.64715400  | -5.33397400 | 1.93473100  |
| C | -7.73170900  | -4.88458600 | 0.62326900  |
| C | -9.00746900  | -4.74256600 | 0.09238800  |
| C | -10.17011500 | -5.00631900 | 0.81341700  |
| C | -10.05888100 | -5.43935800 | 2.12915100  |
| C | -8.43135600  | -6.06993000 | 4.07080200  |
| H | -6.85311900  | -4.64696300 | 0.03417200  |
| H | -11.13436000 | -4.87461700 | 0.33911300  |
| H | -10.95119500 | -5.65399000 | 2.70777400  |
| H | -8.94127700  | -6.99538500 | 4.35634900  |
| H | -8.70645800  | -5.31235900 | 4.81120700  |
| C | -3.97111600  | -7.94866000 | -0.90875300 |
| C | -4.54828000  | -7.40672300 | -2.06536300 |
| C | -2.82964800  | -8.76308100 | -0.96042100 |
| C | -3.89119300  | -7.61825300 | -3.27768000 |

|               |              |              |             |
|---------------|--------------|--------------|-------------|
| C             | -2.21702500  | -8.95666300  | -2.19739900 |
| C             | -2.71392900  | -8.36173100  | -3.35996200 |
| H             | -4.31056300  | -7.18448700  | -4.18283400 |
| H             | -1.31881900  | -9.56772300  | -2.25009800 |
| C             | -2.26350300  | -9.36199900  | 0.30058100  |
| H             | -2.96619000  | -10.07329800 | 0.74296100  |
| H             | -2.08522300  | -8.58976800  | 1.05679500  |
| H             | -1.32263000  | -9.87550800  | 0.09582500  |
| C             | -1.98051800  | -8.49207700  | -4.66866700 |
| H             | -2.67557200  | -8.55149800  | -5.50967700 |
| H             | -1.34140400  | -9.37771600  | -4.68161500 |
| H             | -1.34394500  | -7.61408100  | -4.82726700 |
| C             | -5.81826100  | -6.59889000  | -2.01819000 |
| H             | -6.47051600  | -6.92593100  | -1.20251400 |
| H             | -6.36280900  | -6.69706200  | -2.95969600 |
| H             | -5.60066400  | -5.53645500  | -1.86598800 |
| H             | -6.42178800  | -5.77772700  | 4.89833200  |
| N             | -9.13357200  | -4.29940600  | -1.30069700 |
| O             | -10.25519900 | -4.13699200  | -1.75020400 |
| O             | -8.10918300  | -4.12110600  | -1.93774800 |
| C             | -1.54391400  | -5.03321600  | -2.05399700 |
| C             | -2.18890600  | -3.80007800  | -2.31410200 |
| C             | -1.70855900  | -2.99397600  | -3.36188600 |
| C             | -0.63422800  | -3.42005700  | -4.12852500 |
| C             | -0.02611000  | -4.66678700  | -3.84916000 |
| C             | -0.46562900  | -5.48415200  | -2.82043800 |
| C             | -3.26472300  | -4.84429400  | -0.61166800 |
| C             | -3.27074900  | -3.69724000  | -1.38511700 |
| H             | -2.18575700  | -2.04115600  | -3.57801500 |
| H             | 0.81155100   | -4.98835800  | -4.46296300 |
| H             | 0.00191500   | -6.44392600  | -2.61942800 |
| N             | -2.18613400  | -5.62064300  | -0.99099700 |
| H             | -1.99086600  | -6.54972900  | -0.65212500 |
| H             | -3.99814900  | -2.90277100  | -1.30528200 |
| C             | -4.18191100  | -5.14028400  | 0.47532600  |
| H             | -4.08296200  | -3.41033400  | 1.32244300  |
| O             | -4.78600300  | -4.00662000  | 1.03114500  |
| C             | -0.10335500  | -2.57589400  | -5.26130600 |
| H             | -0.15689700  | -3.11133700  | -6.21463900 |
| H             | -0.67289100  | -1.64928700  | -5.36298200 |
| H             | 0.94631400   | -2.31016300  | -5.09941700 |
| <b>TS5(S)</b> |              |              |             |
| C             | -1.35500000  | 0.46684100   | -0.17635100 |
| C             | -1.96270400  | -0.86652800  | -1.77661300 |

|   |             |             |             |
|---|-------------|-------------|-------------|
| C | -2.45840900 | -1.71894300 | 0.48406500  |
| H | -1.96046100 | -1.56770200 | 1.44306600  |
| N | -1.44439900 | 0.16398500  | -2.38322100 |
| N | -1.07151300 | 0.99142700  | -1.36734500 |
| N | -1.94979200 | -0.70053000 | -0.42400600 |
| C | -2.41582100 | -2.19732200 | -2.27994700 |
| H | -2.07019700 | -2.35422000 | -3.30100900 |
| H | -3.51136000 | -2.27308400 | -2.25338200 |
| C | -2.15422500 | -3.15182500 | -0.08389200 |
| O | -1.79345400 | -3.16607800 | -1.45710500 |
| C | -4.52214700 | -2.92898500 | 0.39502100  |
| C | -3.96598600 | -1.66280900 | 0.57464300  |
| C | -4.75128400 | -0.54136500 | 0.79436300  |
| C | -6.12527500 | -0.74400200 | 0.81956900  |
| C | -6.71694600 | -1.99317000 | 0.64680800  |
| C | -5.90436900 | -3.10099500 | 0.43457000  |
| C | -3.44529600 | -3.96055900 | 0.18263100  |
| H | -4.32207500 | 0.44326000  | 0.94667800  |
| H | -7.79569300 | -2.07956100 | 0.67605800  |
| H | -6.34693500 | -4.08117200 | 0.29342500  |
| H | -3.65022500 | -4.63546400 | -0.65274300 |
| H | -3.32932300 | -4.57525400 | 1.08139200  |
| C | -0.54257100 | 2.31064900  | -1.61868600 |
| C | -1.36722200 | 3.40319300  | -1.33250900 |
| C | 0.76566600  | 2.44431900  | -2.09627400 |
| C | -0.81636900 | 4.67605200  | -1.47506400 |
| C | 1.26416100  | 3.73946300  | -2.21560600 |
| C | 0.50350900  | 4.86083900  | -1.88460200 |
| H | -1.43406600 | 5.54111100  | -1.24729600 |
| H | 2.28810600  | 3.87016800  | -2.55863400 |
| C | 1.63949200  | 1.26982200  | -2.44117400 |
| H | 1.06362800  | 0.38161700  | -2.70045200 |
| H | 2.27045600  | 1.01965600  | -1.58160800 |
| H | 2.29308700  | 1.52988800  | -3.27703900 |
| C | 1.11594600  | 6.23473000  | -1.94061600 |
| H | 0.35253800  | 7.01508800  | -1.91415700 |
| H | 1.71736200  | 6.36483700  | -2.84399900 |
| H | 1.77850600  | 6.37661400  | -1.07901000 |
| C | -2.79095300 | 3.23586400  | -0.86337300 |
| H | -3.27355700 | 2.36710800  | -1.32069700 |
| H | -3.37443100 | 4.12117000  | -1.12139500 |
| H | -2.84350400 | 3.11352600  | 0.22406700  |
| H | -1.28879800 | -3.57129400 | 0.42933600  |
| N | -6.99586600 | 0.41851900  | 1.03269700  |

|   |             |             |             |
|---|-------------|-------------|-------------|
| O | -8.19933100 | 0.22992400  | 1.07624900  |
| O | -6.46791700 | 1.51027200  | 1.15190400  |
| C | 2.14690500  | 2.25123800  | 0.90444000  |
| C | 1.55953600  | 3.46853000  | 1.36279500  |
| C | 2.31148200  | 4.66050300  | 1.37347900  |
| C | 3.62754800  | 4.64332500  | 0.95417100  |
| C | 4.20454900  | 3.41516500  | 0.53331100  |
| C | 3.49915800  | 2.22931600  | 0.50916900  |
| C | 0.05863200  | 1.81954100  | 1.36437500  |
| C | 0.20888500  | 3.15843800  | 1.68127800  |
| H | 1.85288400  | 5.59249400  | 1.69755200  |
| H | 5.24351200  | 3.41845700  | 0.21133800  |
| H | 3.97046200  | 1.31271300  | 0.16895600  |
| N | 1.20735600  | 1.25429600  | 0.87943500  |
| H | -0.57989700 | 3.83279800  | 1.98715400  |
| C | -1.21684700 | 1.14703700  | 1.17487500  |
| O | -2.21548600 | 1.20705900  | 1.86768200  |
| C | 3.53419600  | -1.05220600 | 1.08984400  |
| C | 2.55957800  | -0.68089900 | 2.02144200  |
| C | 2.89771500  | -0.44139900 | 3.33841600  |
| C | 4.23805500  | -0.57270100 | 3.71774600  |
| C | 5.20124000  | -0.94145700 | 2.78090400  |
| C | 4.86615600  | -1.19169100 | 1.44482500  |
| C | 1.58878200  | -1.10905800 | -0.12194100 |
| C | 1.23981200  | -0.62927400 | 1.30920300  |
| H | 2.13191500  | -0.15386800 | 4.05257500  |
| H | 4.53044200  | -0.38864300 | 4.74586400  |
| H | 6.23649300  | -1.04277000 | 3.09031700  |
| H | 5.61942500  | -1.49297800 | 0.72455000  |
| N | 2.95361100  | -1.22939600 | -0.18425700 |
| O | 0.80627600  | -1.38031800 | -1.01457300 |
| C | 3.66832400  | -1.68106500 | -1.36363600 |
| H | 4.54359100  | -1.03918600 | -1.51514000 |
| H | 2.98362900  | -1.52628600 | -2.20329900 |
| C | 4.07977900  | -3.13527600 | -1.27513800 |
| C | 5.41099100  | -3.51710600 | -1.42743200 |
| C | 3.10787600  | -4.11264400 | -1.04197000 |
| C | 5.77338700  | -4.86104600 | -1.34524800 |
| H | 6.16967900  | -2.75995900 | -1.61055400 |
| C | 3.46800400  | -5.45292000 | -0.95807800 |
| H | 2.06765500  | -3.81318700 | -0.93452000 |
| C | 4.80291600  | -5.82968800 | -1.10854800 |
| H | 6.81350900  | -5.14806500 | -1.46189600 |
| H | 2.70787400  | -6.20662300 | -0.77903700 |



|   |            |             |             |
|---|------------|-------------|-------------|
| H | 5.08328300 | -6.87597400 | -1.04197200 |
| O | 0.12745900 | -0.89562800 | 1.80671800  |
| C | 4.46169300 | 5.89994500  | 0.92856100  |
| H | 5.33028300 | 5.81601100  | 1.58990000  |
| H | 4.84213000 | 6.10214100  | -0.07823400 |
| H | 3.87781800 | 6.76660400  | 1.24807700  |

**H/Cl/H/Bn**

**R1**

|    |             |             |             |
|----|-------------|-------------|-------------|
| C  | -0.23306100 | 1.07032500  | -0.44547700 |
| C  | -1.54618100 | 1.20323000  | 0.07867700  |
| C  | -1.97812900 | 2.45769500  | 0.55274300  |
| C  | -1.09084800 | 3.50653400  | 0.48293600  |
| C  | 0.21448700  | 3.37193700  | -0.04033000 |
| C  | 0.65663200  | 2.15313300  | -0.50974900 |
| C  | -1.23215200 | -0.92617200 | -0.56581500 |
| C  | -2.16171400 | -0.07853100 | -0.00904500 |
| H  | -2.97351000 | 2.59348100  | 0.96038100  |
| H  | 0.86398000  | 4.23917100  | -0.06731700 |
| H  | 1.65645100  | 2.04033100  | -0.91392200 |
| N  | -0.06934100 | -0.23004300 | -0.82857900 |
| H  | 0.76828400  | -0.62166700 | -1.23368800 |
| H  | -3.15940800 | -0.35996400 | 0.29328900  |
| C  | -1.36053600 | -2.35239600 | -0.86830700 |
| H  | -0.46806400 | -2.82979500 | -1.31771500 |
| O  | -2.37020100 | -2.98800200 | -0.64703700 |
| Cl | -1.58345200 | 5.08543900  | 1.06394800  |

**si-M2**

|   |              |             |            |
|---|--------------|-------------|------------|
| C | -4.68633300  | -6.33775500 | 0.87289100 |
| C | -5.81309800  | -7.91222400 | 1.98842000 |
| C | -6.38759800  | -5.63206600 | 2.69579700 |
| H | -5.81592700  | -4.72825200 | 2.89141400 |
| N | -5.20064100  | -8.57953900 | 1.07790100 |
| N | -4.49832800  | -7.61552200 | 0.35942000 |
| N | -5.53313600  | -6.56495100 | 1.96624300 |
| C | -6.74135100  | -8.40732100 | 3.04774300 |
| H | -6.52235500  | -9.44745600 | 3.28875600 |
| H | -7.78480000  | -8.33815400 | 2.70562400 |
| C | -6.88715300  | -6.26768600 | 4.04809700 |
| O | -6.52516400  | -7.62782300 | 4.20724200 |
| C | -8.79367300  | -5.60191300 | 2.68847800 |
| C | -7.65673900  | -5.33287600 | 1.92756300 |
| C | -7.75188100  | -4.89755900 | 0.61223500 |
| C | -9.03174400  | -4.76336000 | 0.08958300 |
| C | -10.18831000 | -5.02143900 | 0.82226600 |

|   |              |              |             |
|---|--------------|--------------|-------------|
| C | -10.06635000 | -5.44170400  | 2.14124700  |
| C | -8.42237300  | -6.05484800  | 4.07499800  |
| H | -6.87832400  | -4.66479800  | 0.01375600  |
| H | -11.15634200 | -4.89615600  | 0.35395300  |
| H | -10.95382500 | -5.65319600  | 2.72837300  |
| H | -8.93020300  | -6.97785400  | 4.37186700  |
| H | -8.68986000  | -5.29157300  | 4.81230400  |
| C | -3.96482200  | -7.94903300  | -0.91319200 |
| C | -4.54204400  | -7.41759200  | -2.07470000 |
| C | -2.81951000  | -8.75875300  | -0.95562200 |
| C | -3.88164600  | -7.63566200  | -3.28407400 |
| C | -2.20325000  | -8.95808100  | -2.19007300 |
| C | -2.70117500  | -8.37519000  | -3.35841000 |
| H | -4.30182800  | -7.21182100  | -4.19349500 |
| H | -1.30302000  | -9.56651300  | -2.23664800 |
| C | -2.25480500  | -9.34915100  | 0.31005500  |
| H | -2.95079200  | -10.07075900 | 0.74625000  |
| H | -2.09301500  | -8.57512500  | 1.06794500  |
| H | -1.30548900  | -9.84962800  | 0.11243500  |
| C | -1.96882200  | -8.51795000  | -4.66653300 |
| H | -2.66564400  | -8.60578200  | -5.50357700 |
| H | -1.31520700  | -9.39290900  | -4.66432900 |
| H | -1.34764700  | -7.63325400  | -4.84652400 |
| C | -5.81568900  | -6.61483200  | -2.03697500 |
| H | -6.46547900  | -6.93229800  | -1.21570000 |
| H | -6.36124800  | -6.73002300  | -2.97591200 |
| H | -5.60385000  | -5.54883300  | -1.90217800 |
| H | -6.40552000  | -5.76165600  | 4.88449100  |
| N | -9.16864300  | -4.33669500  | -1.30766100 |
| O | -10.29349300 | -4.17473300  | -1.74882300 |
| O | -8.14913800  | -4.17133000  | -1.95602100 |
| C | -1.53954100  | -5.02576500  | -2.05470100 |
| C | -2.17507100  | -3.78160000  | -2.30470500 |
| C | -1.68507600  | -2.96390100  | -3.33637900 |
| C | -0.60913300  | -3.42574700  | -4.07034700 |
| C | 0.00788200   | -4.66514400  | -3.83095900 |
| C | -0.45949600  | -5.48170900  | -2.81166800 |
| C | -3.26948000  | -4.83562500  | -0.62383800 |
| C | -3.26109400  | -3.67874000  | -1.38408700 |
| H | -2.13861900  | -2.00457500  | -3.56044100 |
| H | 0.84589000   | -4.97349700  | -4.44512500 |
| H | -0.00324100  | -6.44723200  | -2.61586500 |
| N | -2.19579900  | -5.61744300  | -1.00582800 |
| H | -2.00449200  | -6.54867400  | -0.66993000 |

|               |             |             |             |
|---------------|-------------|-------------|-------------|
| H             | -3.98137100 | -2.87882800 | -1.30169400 |
| C             | -4.19367700 | -5.13206200 | 0.45383700  |
| H             | -4.11957300 | -3.41003400 | 1.32220700  |
| O             | -4.81246000 | -3.99933800 | 0.99425000  |
| Cl            | 0.02404400  | -2.42494700 | -5.37115900 |
| <b>TS5(S)</b> |             |             |             |
| C             | -1.35484800 | 0.46941500  | -0.17027600 |
| C             | -1.95810200 | -0.85932900 | -1.77536000 |
| C             | -2.45040100 | -1.72249800 | 0.48264200  |
| H             | -1.95168800 | -1.57348200 | 1.44170500  |
| N             | -1.44206000 | 0.17491900  | -2.37772300 |
| N             | -1.07154100 | 0.99954800  | -1.35907300 |
| N             | -1.94607700 | -0.69851900 | -0.42213400 |
| C             | -2.40479600 | -2.19033100 | -2.28400700 |
| H             | -2.05785000 | -2.34155600 | -3.30543900 |
| H             | -3.49988200 | -2.27182100 | -2.25796200 |
| C             | -2.14246700 | -3.15224400 | -0.09208900 |
| O             | -1.77723200 | -3.15810500 | -1.46398700 |
| C             | -4.51155600 | -2.93653000 | 0.38558500  |
| C             | -3.95806900 | -1.67044200 | 0.57378100  |
| C             | -4.74590800 | -0.55188000 | 0.79894300  |
| C             | -6.11949200 | -0.75719900 | 0.82132400  |
| C             | -6.70848200 | -2.00645900 | 0.64055400  |
| C             | -5.89350400 | -3.11140900 | 0.42259900  |
| C             | -3.43285400 | -3.96468100 | 0.16652000  |
| H             | -4.31991400 | 0.43326300  | 0.95644400  |
| H             | -7.78710300 | -2.09507200 | 0.66791000  |
| H             | -6.33404500 | -4.09153100 | 0.27493400  |
| H             | -3.63593300 | -4.63300900 | -0.67460800 |
| H             | -3.31707900 | -4.58669900 | 1.06019800  |
| C             | -0.54276600 | 2.31975400  | -1.60688200 |
| C             | -1.36745900 | 3.41102100  | -1.31780100 |
| C             | 0.76609500  | 2.45503600  | -2.08426100 |
| C             | -0.81599100 | 4.68473500  | -1.45533600 |
| C             | 1.26562800  | 3.75013600  | -2.19612500 |
| C             | 0.50388100  | 4.87108200  | -1.86356900 |
| H             | -1.43396800 | 5.54893400  | -1.22544300 |
| H             | 2.28916500  | 3.88246000  | -2.54009600 |
| C             | 1.63793700  | 1.28195000  | -2.44011500 |
| H             | 1.06049700  | 0.39683100  | -2.70608700 |
| H             | 2.27218900  | 1.02195300  | -1.58593000 |
| H             | 2.28987800  | 1.54865700  | -3.27504800 |
| C             | 1.11356100  | 6.24580000  | -1.93236300 |
| H             | 0.35996800  | 7.02415200  | -1.79783800 |

|   |              |              |              |
|---|--------------|--------------|--------------|
| H | 1. 61364300  | 6. 40787600  | -2. 89097500 |
| H | 1. 86796800  | 6. 35989100  | -1. 14581700 |
| C | -2. 79034300 | 3. 24134600  | -0. 84711300 |
| H | -3. 27382200 | 2. 37527800  | -1. 30848700 |
| H | -3. 37413300 | 4. 12821100  | -1. 09876400 |
| H | -2. 84149600 | 3. 11324300  | 0. 23993900  |
| H | -1. 27775800 | -3. 57265900 | 0. 42152300  |
| N | -6. 99243700 | 0. 40267200  | 1. 03949900  |
| O | -8. 19549400 | 0. 21161000  | 1. 08083000  |
| O | -6. 46642400 | 1. 49470800  | 1. 16470800  |
| C | 2. 14649400  | 2. 26177700  | 0. 89480200  |
| C | 1. 54372000  | 3. 48505400  | 1. 32258600  |
| C | 2. 26900600  | 4. 68947300  | 1. 28791600  |
| C | 3. 57070700  | 4. 63456700  | 0. 84364700  |
| C | 4. 19262500  | 3. 42923100  | 0. 45586700  |
| C | 3. 49391100  | 2. 23819200  | 0. 48927200  |
| C | 0. 06190800  | 1. 82466000  | 1. 37029500  |
| C | 0. 19648900  | 3. 17015200  | 1. 65362300  |
| H | 1. 81597200  | 5. 63192700  | 1. 57847900  |
| H | 5. 22508600  | 3. 45068900  | 0. 12508600  |
| H | 3. 97447200  | 1. 31614300  | 0. 17973300  |
| N | 1. 21588700  | 1. 25861500  | 0. 90186700  |
| H | -0. 59797400 | 3. 84570700  | 1. 93995400  |
| C | -1. 21216600 | 1. 13639000  | 1. 18693000  |
| O | -2. 20221300 | 1. 18668600  | 1. 88917400  |
| C | 3. 54196100  | -1. 05089800 | 1. 08638100  |
| C | 2. 57089300  | -0. 67049000 | 2. 01793400  |
| C | 2. 91139000  | -0. 43164700 | 3. 33438100  |
| C | 4. 25071600  | -0. 57368700 | 3. 71343800  |
| C | 5. 21056200  | -0. 95069200 | 2. 77653400  |
| C | 4. 87311400  | -1. 19959900 | 1. 44076300  |
| C | 1. 59612200  | -1. 09297400 | -0. 12476000 |
| C | 1. 25034000  | -0. 60281000 | 1. 30519800  |
| H | 2. 14833000  | -0. 13646600 | 4. 04836800  |
| H | 4. 54492400  | -0. 39109300 | 4. 74125500  |
| H | 6. 24510700  | -1. 05969500 | 3. 08554800  |
| H | 5. 62375000  | -1. 50766900 | 0. 72069700  |
| N | 2. 95944600  | -1. 22473100 | -0. 18793800 |
| O | 0. 80986400  | -1. 36089200 | -1. 01485200 |
| C | 3. 66828500  | -1. 69182100 | -1. 36543900 |
| H | 4. 54812100  | -1. 05803300 | -1. 52395800 |
| H | 2. 98284700  | -1. 53816900 | -2. 20464800 |
| C | 4. 06919200  | -3. 14819100 | -1. 26650400 |
| C | 5. 39789800  | -3. 53912700 | -1. 41738800 |

|    |            |             |             |
|----|------------|-------------|-------------|
| C  | 3.09138300 | -4.11782300 | -1.02604300 |
| C  | 5.75219400 | -4.88461400 | -1.32665000 |
| H  | 6.16095300 | -2.78784600 | -1.60632400 |
| C  | 3.44353200 | -5.45972800 | -0.93351300 |
| H  | 2.05294200 | -3.81157300 | -0.92024000 |
| C  | 4.77596400 | -5.84560300 | -1.08264900 |
| H  | 6.79038300 | -5.17884700 | -1.44234500 |
| H  | 2.67902500 | -6.20766400 | -0.74903600 |
| H  | 5.04984200 | -6.89314900 | -1.00941100 |
| O  | 0.13581000 | -0.87278200 | 1.80250100  |
| Cl | 4.50203000 | 6.12158700  | 0.73314300  |

**H/Br/H/Bn**

**R1**

|    |             |             |             |
|----|-------------|-------------|-------------|
| C  | -0.23130300 | 1.06988200  | -0.44214200 |
| C  | -1.54413800 | 1.20209100  | 0.08309300  |
| C  | -1.97602600 | 2.45693100  | 0.55557000  |
| C  | -1.09040400 | 3.50692200  | 0.48307300  |
| C  | 0.21477000  | 3.37272200  | -0.03961500 |
| C  | 0.65786600  | 2.15323000  | -0.50714600 |
| C  | -1.23159100 | -0.92613100 | -0.56456000 |
| C  | -2.16029800 | -0.07929500 | -0.00560000 |
| H  | -2.97174400 | 2.59175800  | 0.96237200  |
| H  | 0.86453600  | 4.23940700  | -0.06982000 |
| H  | 1.65763500  | 2.04070300  | -0.91168600 |
| N  | -0.06837500 | -0.22998200 | -0.82687100 |
| H  | 0.76837900  | -0.62123800 | -1.23416700 |
| H  | -3.15812300 | -0.36037800 | 0.29661400  |
| C  | -1.36244000 | -2.35133300 | -0.87135100 |
| H  | -0.47158700 | -2.82889100 | -1.32366900 |
| O  | -2.37301800 | -2.98567200 | -0.65076200 |
| Br | -1.63371600 | 5.21891300  | 1.10125400  |

**si-M2**

|   |             |             |            |
|---|-------------|-------------|------------|
| C | -4.68588200 | -6.34478300 | 0.86895700 |
| C | -5.81590300 | -7.91272800 | 1.99067700 |
| C | -6.38263000 | -5.63021100 | 2.69348100 |
| H | -5.80975600 | -4.72691300 | 2.88700200 |
| N | -5.20947700 | -8.58378900 | 1.07890000 |
| N | -4.50536300 | -7.62391000 | 0.35715700 |
| N | -5.52964600 | -6.56677600 | 1.96615200 |
| C | -6.74506900 | -8.40282500 | 3.05163400 |
| H | -6.52887900 | -9.44309700 | 3.29463200 |
| H | -7.78839800 | -8.33154000 | 2.70952900 |
| C | -6.88377500 | -6.26072700 | 4.04732400 |
| O | -6.52663700 | -7.62178100 | 4.20949100 |

|   |              |              |             |
|---|--------------|--------------|-------------|
| C | -8.78838400  | -5.59354700  | 2.68568600  |
| C | -7.65067400  | -5.33084700  | 1.92375000  |
| C | -7.74434800  | -4.90131400  | 0.60640700  |
| C | -9.02380800  | -4.76624500  | 0.08289400  |
| C | -10.18112400 | -5.01770000  | 0.81667100  |
| C | -10.06052600 | -5.43222500  | 2.13760200  |
| C | -8.41818400  | -6.04180000  | 4.07408600  |
| H | -6.87006500  | -4.67415600  | 0.00668800  |
| H | -11.14876600 | -4.89204500  | 0.34764800  |
| H | -10.94870100 | -5.63865800  | 2.72548400  |
| H | -8.92956400  | -6.96135600  | 4.37548100  |
| H | -8.68201300  | -5.27396900  | 4.80798000  |
| C | -3.96894100  | -7.96487100  | -0.91210400 |
| C | -4.54377100  | -7.44034300  | -2.07813600 |
| C | -2.82368600  | -8.77491600  | -0.94695700 |
| C | -3.88234700  | -7.66777300  | -3.28498100 |
| C | -2.20525900  | -8.98246600  | -2.17928600 |
| C | -2.70211800  | -8.40879400  | -3.35251500 |
| H | -4.30078200  | -7.24981500  | -4.19793200 |
| H | -1.30500700  | -9.59112100  | -2.22024200 |
| C | -2.26117200  | -9.35630400  | 0.32368300  |
| H | -2.96050000  | -10.07059400 | 0.76651700  |
| H | -2.09548400  | -8.57570300  | 1.07376400  |
| H | -1.31418300  | -9.86274100  | 0.13025300  |
| C | -1.97238900  | -8.56507300  | -4.66076800 |
| H | -2.67057200  | -8.71873400  | -5.48730500 |
| H | -1.27772200  | -9.40724500  | -4.63142000 |
| H | -1.39645700  | -7.65936800  | -4.88078300 |
| C | -5.81448100  | -6.63280500  | -2.04644500 |
| H | -6.46551700  | -6.94192200  | -1.22304100 |
| H | -6.36026000  | -6.75228500  | -2.98469300 |
| H | -5.59886500  | -5.56657000  | -1.91903500 |
| H | -6.39999800  | -5.75448000  | 4.88234400  |
| N | -9.15944900  | -4.34657600  | -1.31659600 |
| O | -10.28381200 | -4.18375200  | -1.75866200 |
| O | -8.13944400  | -4.18771600  | -1.96578600 |
| C | -1.55483200  | -5.01142100  | -2.07955700 |
| C | -2.17435100  | -3.75195600  | -2.29080100 |
| C | -1.67483900  | -2.91145100  | -3.29896300 |
| C | -0.60733300  | -3.36612400  | -4.04956100 |
| C | -0.00865000  | -4.62117900  | -3.85118500 |
| C | -0.48493200  | -5.46096500  | -2.85467900 |
| C | -3.27155800  | -4.83562400  | -0.63072600 |
| C | -3.25283900  | -3.65923000  | -1.36064000 |

|    |             |             |             |
|----|-------------|-------------|-------------|
| H  | -2.11293700 | -1.93817100 | -3.48978100 |
| H  | 0.82305400  | -4.92411700 | -4.47593100 |
| H  | -0.04115600 | -6.43780300 | -2.68805200 |
| N  | -2.21253700 | -5.62246800 | -1.04323100 |
| H  | -2.02688200 | -6.56270200 | -0.72968600 |
| H  | -3.96120200 | -2.85201700 | -1.25230500 |
| C  | -4.19103000 | -5.13999700 | 0.44863000  |
| H  | -4.10233700 | -3.42690500 | 1.33333700  |
| O  | -4.80038000 | -4.00768300 | 1.00088000  |
| Br | 0.09787000  | -2.23888800 | -5.41516300 |

**TS5(S)**

|   |             |             |             |
|---|-------------|-------------|-------------|
| C | -1.35518600 | 0.46724000  | -0.15850600 |
| C | -1.95843600 | -0.84547000 | -1.77709600 |
| C | -2.45673500 | -1.72726300 | 0.47230400  |
| H | -1.95872500 | -1.58707500 | 1.43324100  |
| N | -1.43470300 | 0.19109400  | -2.36861700 |
| N | -1.06353000 | 1.00591600  | -1.34210500 |
| N | -1.95051000 | -0.69587100 | -0.42278500 |
| C | -2.41084300 | -2.16964900 | -2.29827800 |
| H | -2.06412800 | -2.31308200 | -3.32089200 |
| H | -3.50629400 | -2.24621000 | -2.27346100 |
| C | -2.14842500 | -3.15204300 | -0.11394800 |
| O | -1.78814600 | -3.14819900 | -1.48734400 |
| C | -4.51659700 | -2.94224600 | 0.36899300  |
| C | -3.96451200 | -1.67643800 | 0.56349700  |
| C | -4.75379900 | -0.56014800 | 0.79487700  |
| C | -6.12709500 | -0.76757500 | 0.81762000  |
| C | -6.71454400 | -2.01669000 | 0.63120600  |
| C | -5.89822200 | -3.11931000 | 0.40655800  |
| C | -3.43671000 | -3.96782700 | 0.14361400  |
| H | -4.32927500 | 0.42485500  | 0.95683900  |
| H | -7.79300000 | -2.10697600 | 0.65955500  |
| H | -6.33752800 | -4.09930500 | 0.25443000  |
| H | -3.64019800 | -4.63291200 | -0.69991600 |
| H | -3.31815800 | -4.59317600 | 1.03463700  |
| C | -0.52013100 | 2.32226000  | -1.58285500 |
| C | -1.33034000 | 3.42211100  | -1.28600700 |
| C | 0.78928100  | 2.44564400  | -2.06301500 |
| C | -0.76245100 | 4.69001100  | -1.41465700 |
| C | 1.30537200  | 3.73487800  | -2.16545300 |
| C | 0.55919200  | 4.86339200  | -1.82352500 |
| H | -1.36869700 | 5.55985600  | -1.17486700 |
| H | 2.33240400  | 3.85652800  | -2.50313300 |
| C | 1.64721100  | 1.26534400  | -2.42804600 |

|   |              |              |              |
|---|--------------|--------------|--------------|
| H | 1. 06021400  | 0. 38812400  | -2. 69887200 |
| H | 2. 28060300  | 0. 99350200  | -1. 57714200 |
| H | 2. 30076600  | 1. 53055300  | -3. 26221600 |
| C | 1. 18185600  | 6. 23209400  | -1. 90719300 |
| H | 0. 51201000  | 6. 99799800  | -1. 51098700 |
| H | 1. 41953200  | 6. 48952700  | -2. 94397500 |
| H | 2. 11723500  | 6. 26340700  | -1. 33895900 |
| C | -2. 75432100 | 3. 26595300  | -0. 81388000 |
| H | -3. 24894100 | 2. 41025800  | -1. 28282200 |
| H | -3. 32767100 | 4. 16222300  | -1. 05611000 |
| H | -2. 80627900 | 3. 12783300  | 0. 27198900  |
| H | -1. 28121700 | -3. 57461000 | 0. 39363200  |
| N | -7. 00153100 | 0. 38984100  | 1. 04283900  |
| O | -8. 20425200 | 0. 19676300  | 1. 08457800  |
| O | -6. 47705000 | 1. 48201400  | 1. 17315500  |
| C | 2. 12471000  | 2. 26051500  | 0. 89574800  |
| C | 1. 51281500  | 3. 48065300  | 1. 32022800  |
| C | 2. 21276800  | 4. 69652700  | 1. 23754200  |
| C | 3. 49739800  | 4. 65651000  | 0. 74644400  |
| C | 4. 13457500  | 3. 45555000  | 0. 37169700  |
| C | 3. 46281600  | 2. 25142900  | 0. 45884300  |
| C | 0. 05086100  | 1. 80583000  | 1. 40255200  |
| C | 0. 17532200  | 3. 15388800  | 1. 67647800  |
| H | 1. 74688900  | 5. 63710800  | 1. 51293700  |
| H | 5. 15452100  | 3. 48947800  | 0. 00577800  |
| H | 3. 95341100  | 1. 33110300  | 0. 15916000  |
| N | 1. 20514000  | 1. 24820100  | 0. 92494200  |
| H | -0. 62279600 | 3. 82457100  | 1. 96413100  |
| C | -1. 22037600 | 1. 11641600  | 1. 20878700  |
| O | -2. 21443800 | 1. 15694500  | 1. 90574400  |
| C | 3. 54123600  | -1. 04748600 | 1. 09451100  |
| C | 2. 56966000  | -0. 67534800 | 2. 02888700  |
| C | 2. 91107300  | -0. 43876400 | 3. 34551000  |
| C | 4. 25184800  | -0. 57443400 | 3. 72180600  |
| C | 5. 21225900  | -0. 94257900 | 2. 78198700  |
| C | 4. 87387000  | -1. 18920700 | 1. 44603800  |
| C | 1. 59326000  | -1. 09921300 | -0. 11273700 |
| C | 1. 24748700  | -0. 61253600 | 1. 31824400  |
| H | 2. 14747600  | -0. 15074200 | 4. 06184400  |
| H | 4. 54677300  | -0. 39376300 | 4. 74976000  |
| H | 6. 24797900  | -1. 04651200 | 3. 08879000  |
| H | 5. 62495700  | -1. 49101900 | 0. 72377600  |
| N | 2. 95706100  | -1. 22385400 | -0. 17886500 |
| O | 0. 80611300  | -1. 37061700 | -1. 00102800 |



|    |            |             |             |
|----|------------|-------------|-------------|
| C  | 3.66533800 | -1.69045400 | -1.35701400 |
| H  | 4.54352900 | -1.05487400 | -1.51749800 |
| H  | 2.97832000 | -1.53915100 | -2.19537400 |
| C  | 4.06938700 | -3.14590500 | -1.25704100 |
| C  | 5.39864600 | -3.53463300 | -1.40872000 |
| C  | 3.09354200 | -4.11706200 | -1.01472600 |
| C  | 5.75533300 | -4.87943600 | -1.31695700 |
| H  | 6.16025000 | -2.78228400 | -1.59922400 |
| C  | 3.44807300 | -5.45823200 | -0.92111500 |
| H  | 2.05468100 | -3.81252300 | -0.90835300 |
| C  | 4.78104900 | -5.84190700 | -1.07107000 |
| H  | 6.79392500 | -5.17195600 | -1.43337100 |
| H  | 2.68500800 | -6.20728800 | -0.73520400 |
| H  | 5.05686100 | -6.88889000 | -0.99703900 |
| O  | 0.13426000 | -0.88919800 | 1.81526500  |
| Br | 4.44174100 | 6.29390300  | 0.51724900  |

**Coordinates for rate-determining step catalyzed by different catalysts at the IEFPCM(THF)//M062X/6-31G(d,p) level**

*NHC<sub>A</sub>*

*si-M2*

|   |              |             |            |
|---|--------------|-------------|------------|
| C | -4.66212500  | -6.09745800 | 0.90552000 |
| C | -5.68792500  | -7.81881700 | 1.88994300 |
| C | -6.46466300  | -5.62834100 | 2.69122600 |
| H | -5.97275600  | -4.67872100 | 2.89853300 |
| N | -4.98834100  | -8.39969000 | 0.98203900 |
| N | -4.32952200  | -7.33952700 | 0.33445500 |
| N | -5.53006800  | -6.45559500 | 1.93711700 |
| C | -6.59459900  | -8.42206800 | 2.91333200 |
| H | -6.31931100  | -9.45920300 | 3.10448400 |
| H | -7.63652000  | -8.38949600 | 2.56301200 |
| C | -6.87122200  | -6.34422400 | 4.03224800 |
| O | -6.42524300  | -7.69005000 | 4.11166300 |
| C | -8.85906100  | -5.77537300 | 2.75143700 |
| C | -7.77096500  | -5.42875400 | 1.95454000 |
| C | -7.93992800  | -4.98942800 | 0.64428100 |
| C | -9.23456900  | -4.90005500 | 0.13829100 |
| C | -10.33175200 | -5.24121600 | 0.93418800 |
| C | -10.15294000 | -5.68029300 | 2.24437600 |
| C | -8.41278600  | -6.22525800 | 4.11999700 |
| H | -7.07934000  | -4.72985600 | 0.03376000 |
| H | -11.33412300 | -5.16685300 | 0.52442500 |
| H | -11.00839500 | -5.95125500 | 2.85618100 |
| H | -8.84537600  | -7.18524400 | 4.42021300 |

|   |             |             |             |
|---|-------------|-------------|-------------|
| H | -8.69466900 | -5.49437600 | 4.88472200  |
| C | -3.91438200 | -7.53132300 | -0.99206700 |
| C | -4.48724400 | -6.83833100 | -2.05702200 |
| C | -2.80609100 | -8.33781500 | -1.25506600 |
| C | -3.92411500 | -6.88302000 | -3.32585200 |
| C | -2.26497500 | -8.42645500 | -2.52593600 |
| C | -2.81576200 | -7.68085700 | -3.56172400 |
| H | -6.38473500 | -5.85280800 | 4.87503700  |
| C | -1.41089500 | -5.13271800 | -1.72418800 |
| C | -2.17575600 | -4.17702800 | -2.44215400 |
| C | -1.74881400 | -3.80242100 | -3.72803100 |
| C | -0.60155100 | -4.37556300 | -4.24974000 |
| C | 0.14474900  | -5.31797300 | -3.51320000 |
| C | -0.24564700 | -5.70734100 | -2.24194400 |
| C | -3.24406300 | -4.64823500 | -0.50621400 |
| C | -3.32674700 | -3.87734400 | -1.64404500 |
| H | -2.32169700 | -3.08420800 | -4.30685900 |
| H | -0.26964600 | -4.09977400 | -5.24542800 |
| H | 1.03770200  | -5.75087100 | -3.95214500 |
| H | 0.31527000  | -6.44620100 | -1.67734200 |
| N | -2.06127400 | -5.36550500 | -0.53772000 |
| H | -1.75932700 | -5.99738400 | 0.18931500  |
| H | -4.16145200 | -3.24323600 | -1.90479800 |
| C | -4.22447200 | -4.86231100 | 0.54868100  |
| H | -4.29065500 | -3.13527400 | 1.40091800  |
| O | -4.92495000 | -3.75682500 | 1.01994200  |
| H | -9.39397600 | -4.56318300 | -0.88092000 |
| F | -5.56576300 | -6.08254700 | -1.86260500 |
| F | -4.44853700 | -6.16158400 | -4.31251000 |
| F | -2.26748900 | -7.72176400 | -4.77060700 |
| F | -1.17908700 | -9.16502000 | -2.74620900 |
| F | -2.20903300 | -8.97426900 | -0.24963800 |

**TS5(R)**

|   |             |             |             |
|---|-------------|-------------|-------------|
| C | -1.50186700 | 0.11324400  | -0.07130300 |
| C | -1.81081900 | -1.26600500 | -1.72243700 |
| C | -2.20131600 | -2.24936300 | 0.51308200  |
| H | -1.77210300 | -2.01175600 | 1.48807000  |
| N | -1.44372700 | -0.15698300 | -2.29496100 |
| N | -1.25630200 | 0.69746100  | -1.25041500 |
| N | -1.88244100 | -1.12564500 | -0.36520600 |
| C | -1.96966500 | -2.65199500 | -2.25417900 |
| H | -1.57826300 | -2.71503900 | -3.26861400 |
| H | -3.02360200 | -2.95932100 | -2.24747300 |
| C | -1.57326800 | -3.57009300 | -0.06532600 |

|   |             |             |             |
|---|-------------|-------------|-------------|
| O | -1.16644800 | -3.46954600 | -1.42403500 |
| C | -3.94627000 | -3.87123100 | 0.33148700  |
| C | -3.68745300 | -2.52088600 | 0.55419700  |
| C | -4.71174600 | -1.60914600 | 0.78729100  |
| C | -6.02367400 | -2.07695400 | 0.78316000  |
| C | -6.29304800 | -3.42939600 | 0.55753600  |
| C | -5.25859900 | -4.33600800 | 0.33389900  |
| C | -2.66706100 | -4.64393600 | 0.12994900  |
| H | -4.48603800 | -0.56330300 | 0.97368200  |
| H | -7.32100900 | -3.77748300 | 0.55575000  |
| H | -5.47307200 | -5.38572800 | 0.15790400  |
| H | -2.69152800 | -5.31199000 | -0.73567400 |
| H | -2.44212800 | -5.25601600 | 1.00951000  |
| C | -0.82663700 | 2.02938400  | -1.48824100 |
| C | -1.60028600 | 3.09752700  | -1.04860000 |
| C | 0.39610500  | 2.28086600  | -2.10517600 |
| C | -1.16494800 | 4.40199100  | -1.21587700 |
| C | 0.82928500  | 3.58555200  | -2.28982500 |
| C | 0.05148800  | 4.64402700  | -1.83931900 |
| H | -0.65549400 | -3.80236500 | 0.47513100  |
| C | 1.46819800  | 2.61506600  | 0.90960300  |
| C | 0.64850600  | 3.65298200  | 1.45315500  |
| C | 1.08050900  | 4.99255100  | 1.39646700  |
| C | 2.30271500  | 5.27121200  | 0.81781700  |
| C | 3.11756600  | 4.23426600  | 0.30422400  |
| C | 2.72671700  | 2.90994700  | 0.35140400  |
| C | -0.42084600 | 1.69542600  | 1.51628500  |
| C | -0.56386800 | 3.02724000  | 1.86301900  |
| H | 0.44810200  | 5.78983700  | 1.77670300  |
| H | 2.64624800  | 6.29801000  | 0.74644500  |
| H | 4.06843100  | 4.49029200  | -0.15293800 |
| H | 3.34314800  | 2.12681200  | -0.07752100 |
| N | 0.79318300  | 1.42607000  | 0.94418500  |
| H | -1.46632300 | 3.49530200  | 2.23271500  |
| C | -1.51753700 | 0.75615700  | 1.31090000  |
| O | -2.49212000 | 0.55653500  | 2.00379200  |
| C | 3.61881000  | -0.25656300 | 0.98460400  |
| C | 2.59811600  | -0.16247600 | 1.93619100  |
| C | 2.89149400  | 0.07574500  | 3.26390000  |
| C | 4.23213800  | 0.22784300  | 3.63491400  |
| C | 5.24101700  | 0.13537600  | 2.67794000  |
| C | 4.95269900  | -0.11171600 | 1.33052600  |
| C | 1.72108700  | -0.69069500 | -0.22483600 |
| C | 1.28765400  | -0.37542100 | 1.23158700  |

|   |             |             |             |
|---|-------------|-------------|-------------|
| H | 2.09056100  | 0.14452700  | 3.99399500  |
| H | 4.48942700  | 0.41657800  | 4.67151200  |
| H | 6.27683000  | 0.25152800  | 2.98029000  |
| H | 5.74390000  | -0.20135200 | 0.59368400  |
| N | 3.07725300  | -0.49937900 | -0.29537200 |
| O | 1.00776100  | -1.08906500 | -1.12537700 |
| C | 3.85880600  | -0.74271000 | -1.49321100 |
| H | 4.58309400  | 0.06976800  | -1.61723000 |
| H | 3.14976000  | -0.69503700 | -2.32479800 |
| C | 4.56144600  | -2.08369300 | -1.46673100 |
| C | 5.93526800  | -2.18124000 | -1.67861500 |
| C | 3.81919400  | -3.24525000 | -1.23482700 |
| C | 6.56537700  | -3.42511700 | -1.66031900 |
| H | 6.51636600  | -1.27987800 | -1.85940800 |
| C | 4.44671700  | -4.48561600 | -1.21285800 |
| H | 2.74519900  | -3.16934700 | -1.08046900 |
| C | 5.82251400  | -4.57799500 | -1.42557600 |
| H | 7.63629600  | -3.49043800 | -1.82396500 |
| H | 3.86388000  | -5.38311000 | -1.03147400 |
| H | 6.31190100  | -5.54651100 | -1.40670800 |
| O | 0.28338300  | -0.94304700 | 1.71803500  |
| H | -6.84215400 | -1.38664400 | 0.95834600  |
| F | -2.74459700 | 2.86121900  | -0.41264000 |
| F | -1.88618400 | 5.41249300  | -0.74461900 |
| F | 0.47687600  | 5.88890000  | -1.99324400 |
| F | 2.00141000  | 3.82242000  | -2.86714500 |
| F | 1.17856400  | 1.28365400  | -2.48790700 |

***NHC<sub>B</sub>***

***si-M2***

|   |             |             |            |
|---|-------------|-------------|------------|
| C | -4.72055800 | -6.34364300 | 0.82609200 |
| C | -5.84554100 | -7.92155700 | 1.93771300 |
| C | -6.41657800 | -5.64645400 | 2.66631300 |
| H | -5.83536700 | -4.74560300 | 2.84885500 |
| N | -5.22081800 | -8.59083000 | 1.03581000 |
| N | -4.52086900 | -7.62366600 | 0.31809000 |
| N | -5.57849200 | -6.57423300 | 1.90882800 |
| C | -6.76123700 | -8.41812700 | 3.00663100 |
| H | -6.55090200 | -9.46399700 | 3.23043500 |
| H | -7.80999700 | -8.32791800 | 2.68701000 |
| C | -6.86581400 | -6.28845500 | 4.03347700 |
| O | -6.50871100 | -7.65464500 | 4.16980600 |
| C | -8.81645800 | -5.59656400 | 2.75416700 |
| C | -7.71199700 | -5.33802800 | 1.94647000 |
| C | -7.86295900 | -4.87951800 | 0.63978700 |

|   |              |              |             |
|---|--------------|--------------|-------------|
| C | -9.15214900  | -4.69380000  | 0.14586700  |
| C | -10.26434000 | -4.95579700  | 0.95048000  |
| C | -10.10470100 | -5.40431700  | 2.25982800  |
| C | -8.39635400  | -6.06675100  | 4.12330300  |
| H | -6.99095100  | -4.66481700  | 0.02822100  |
| H | -11.26243000 | -4.80837900  | 0.55010400  |
| H | -10.97130200 | -5.60811400  | 2.88213500  |
| H | -8.89168300  | -6.99369700  | 4.43069600  |
| H | -8.62756500  | -5.31434500  | 4.88398000  |
| C | -3.95712000  | -7.96397700  | -0.93813400 |
| C | -4.51092600  | -7.44524700  | -2.11643200 |
| C | -2.80630800  | -8.76727400  | -0.95100800 |
| C | -3.82433600  | -7.66713700  | -3.31007500 |
| C | -2.16207000  | -8.97065300  | -2.17041700 |
| C | -2.63748500  | -8.39876100  | -3.35338600 |
| H | -4.22694900  | -7.25144100  | -4.23120600 |
| H | -1.25675800  | -9.57284600  | -2.19336700 |
| C | -2.26403600  | -9.34342000  | 0.33077700  |
| H | -2.96955600  | -10.05665500 | 0.76521700  |
| H | -2.11240000  | -8.55957700  | 1.08059600  |
| H | -1.31276000  | -9.84839300  | 0.15502800  |
| C | -1.87390100  | -8.54192500  | -4.64337500 |
| H | -2.55014600  | -8.63980800  | -5.49617200 |
| H | -1.21270900  | -9.41100400  | -4.62189500 |
| H | -1.25672000  | -7.65210500  | -4.81185100 |
| C | -5.78904600  | -6.64932000  | -2.10725200 |
| H | -6.45380800  | -6.97025200  | -1.30008000 |
| H | -6.31092100  | -6.76764000  | -3.05924900 |
| H | -5.57895700  | -5.58407900  | -1.96268100 |
| H | -6.34607300  | -5.79377800  | 4.85423600  |
| C | -1.53789400  | -5.01991300  | -2.06830900 |
| C | -2.17183300  | -3.77658700  | -2.32308500 |
| C | -1.66626300  | -2.96258800  | -3.35085200 |
| C | -0.58080300  | -3.40503800  | -4.09015100 |
| C | 0.02188100   | -4.65107500  | -3.82789100 |
| C | -0.44815800  | -5.47495300  | -2.81467800 |
| C | -3.28684400  | -4.83784900  | -0.65536500 |
| C | -3.27014300  | -3.68007100  | -1.41285100 |
| H | -2.12893300  | -2.00404800  | -3.56730000 |
| H | -0.18799800  | -2.78469700  | -4.88966300 |
| H | 0.86779700   | -4.97177900  | -4.42762700 |
| H | 0.00419100   | -6.44135300  | -2.61049600 |
| N | -2.20512800  | -5.61568000  | -1.02645500 |
| H | -2.01859900  | -6.54888400  | -0.69392800 |

|               |             |             |             |
|---------------|-------------|-------------|-------------|
| H             | -3.99153800 | -2.88042900 | -1.33336000 |
| C             | -4.22494200 | -5.13791100 | 0.41088700  |
| H             | -4.15496900 | -3.41855100 | 1.27936900  |
| O             | -4.84822700 | -4.00407500 | 0.94559500  |
| H             | -9.29469700 | -4.33962800 | -0.87009100 |
| <b>TS5(S)</b> |             |             |             |
| C             | -1.35879900 | 0.48086100  | -0.17231000 |
| C             | -1.96695200 | -0.86336800 | -1.76089900 |
| C             | -2.46347400 | -1.70559200 | 0.50232800  |
| H             | -1.97635100 | -1.53909400 | 1.46414000  |
| N             | -1.45246900 | 0.16419200  | -2.37686400 |
| N             | -1.07853800 | 0.99879700  | -1.36773200 |
| N             | -1.95158100 | -0.68868500 | -0.40979100 |
| C             | -2.41025000 | -2.20150700 | -2.25357100 |
| H             | -2.06620600 | -2.36111300 | -3.27494000 |
| H             | -3.50450000 | -2.28717200 | -2.22077100 |
| C             | -2.13198200 | -3.13761700 | -0.05007800 |
| O             | -1.77444100 | -3.15743700 | -1.42657200 |
| C             | -4.50461400 | -2.94429000 | 0.40295300  |
| C             | -3.97310700 | -1.66796100 | 0.57090700  |
| C             | -4.78499300 | -0.55657200 | 0.76900700  |
| C             | -6.16518000 | -0.74507300 | 0.79026300  |
| C             | -6.70799600 | -2.02159000 | 0.62116400  |
| C             | -5.88408800 | -3.12950900 | 0.42978600  |
| C             | -3.40805800 | -3.96517300 | 0.22410300  |
| H             | -4.34426500 | 0.42696900  | 0.90827400  |
| H             | -7.78541900 | -2.15140500 | 0.63716000  |
| H             | -6.31224800 | -4.11844400 | 0.29663000  |
| H             | -3.58697200 | -4.66243100 | -0.59913700 |
| H             | -3.28281000 | -4.55885800 | 1.13594300  |
| C             | -0.56010000 | 2.31920200  | -1.63120200 |
| C             | -1.39385700 | 3.40687700  | -1.35492500 |
| C             | 0.74414700  | 2.46033600  | -2.11879900 |
| C             | -0.85942400 | 4.68396900  | -1.52197400 |
| C             | 1.22504100  | 3.75910400  | -2.26609800 |
| C             | 0.45288900  | 4.87732000  | -1.94962600 |
| H             | -1.48559800 | 5.54537800  | -1.30389600 |
| H             | 2.24353200  | 3.89691700  | -2.62227500 |
| C             | 1.62875600  | 1.28990800  | -2.45026100 |
| H             | 1.05944100  | 0.39611000  | -2.70490200 |
| H             | 2.25720700  | 1.04982800  | -1.58575900 |
| H             | 2.28420000  | 1.54816600  | -3.28516300 |
| C             | 1.04222500  | 6.25853100  | -2.05876400 |
| H             | 0.27845000  | 7.02924300  | -1.93851800 |

|   |              |              |              |
|---|--------------|--------------|--------------|
| H | 1. 53281400  | 6. 40308100  | -3. 02502100 |
| H | 1. 79915300  | 6. 40321400  | -1. 28101000 |
| C | -2. 81332700 | 3. 23089800  | -0. 87657000 |
| H | -3. 29133600 | 2. 35731200  | -1. 32945300 |
| H | -3. 40424900 | 4. 11164200  | -1. 13341100 |
| H | -2. 85787000 | 3. 10986500  | 0. 21124400  |
| H | -1. 25600800 | -3. 53601000 | 0. 46287600  |
| C | 2. 17452700  | 2. 26054300  | 0. 91206500  |
| C | 1. 58991900  | 3. 48135100  | 1. 37195100  |
| C | 2. 35722100  | 4. 66078100  | 1. 41631200  |
| C | 3. 68130900  | 4. 60872400  | 1. 02829000  |
| C | 4. 26019900  | 3. 39278900  | 0. 59658600  |
| C | 3. 53167900  | 2. 21964600  | 0. 53827600  |
| C | 0. 07554700  | 1. 84495500  | 1. 34660500  |
| C | 0. 23062600  | 3. 18005800  | 1. 66817800  |
| H | 1. 90928800  | 5. 59488900  | 1. 74446800  |
| H | 4. 28941400  | 5. 50750800  | 1. 05082200  |
| H | 5. 30415100  | 3. 38345700  | 0. 29762900  |
| H | 3. 98973800  | 1. 29906400  | 0. 19188800  |
| N | 1. 22621400  | 1. 27210900  | 0. 87351600  |
| H | -0. 55566400 | 3. 85836500  | 1. 97130200  |
| C | -1. 20499400 | 1. 17135000  | 1. 17112600  |
| O | -2. 19260500 | 1. 24333700  | 1. 87686300  |
| C | 3. 54022800  | -1. 05463400 | 1. 08210700  |
| C | 2. 57090200  | -0. 66800400 | 2. 01295600  |
| C | 2. 91304800  | -0. 42889200 | 3. 32886200  |
| C | 4. 25189400  | -0. 57587900 | 3. 70802500  |
| C | 5. 20974700  | -0. 95982500 | 2. 77187200  |
| C | 4. 87062000  | -1. 21000300 | 1. 43681600  |
| C | 1. 59308000  | -1. 09007900 | -0. 12821600 |
| C | 1. 25002200  | -0. 60065800 | 1. 30191100  |
| H | 2. 15146900  | -0. 12889800 | 4. 04245600  |
| H | 4. 54719100  | -0. 39226500 | 4. 73540600  |
| H | 6. 24384400  | -1. 07336500 | 3. 08097600  |
| H | 5. 61947300  | -1. 52290300 | 0. 71690000  |
| N | 2. 95696600  | -1. 22602600 | -0. 19120700 |
| O | 0. 80849600  | -1. 35524700 | -1. 02036000 |
| C | 3. 66533700  | -1. 68423400 | -1. 37166100 |
| H | 4. 54505400  | -1. 04911300 | -1. 52609200 |
| H | 2. 97954900  | -1. 52506400 | -2. 20961000 |
| C | 4. 06682800  | -3. 14122700 | -1. 28385000 |
| C | 5. 39529300  | -3. 53120400 | -1. 43952000 |
| C | 3. 08947100  | -4. 11256000 | -1. 04831700 |
| C | 5. 74984400  | -4. 87727400 | -1. 35851600 |

|   |             |             |             |
|---|-------------|-------------|-------------|
| H | 6.15800700  | -2.77844700 | -1.62415700 |
| C | 3.44182400  | -5.45506600 | -0.96559100 |
| H | 2.05130300  | -3.80687900 | -0.93820700 |
| C | 4.77401700  | -5.83996300 | -1.11953100 |
| H | 6.78789400  | -5.17065900 | -1.47784400 |
| H | 2.67759600  | -6.20419100 | -0.78478700 |
| H | 5.04804100  | -6.88799600 | -1.05387300 |
| O | 0.13723900  | -0.86119600 | 1.80372800  |
| H | -6.82415700 | 0.10408400  | 0.93963300  |
